# Supplementary material for: Translatomics Probes Into the Role of Lycopene on Improving Hepatic Steatosis Induced by High-Fat Diet
Source: Front Nutr. 2021 Nov 2;8:727785. doi: 10.3389/fnut.2021.727785 (PMC8594419; doi:10.3389/fnut.2021.727785)
Supplement: Supplementary Table 4 — KEGG pathways of DEGs in Ribo-seq. [file Table_4.XLSX]

## Sheet: out.path
KEGG_A_class	KEGG_B_class	Pathway	out (576)	All (8154)	Pvalue	Qvalue	Pathway ID	Genes	K_IDs
Metabolism	Global and overview maps	Metabolic pathways	160	1353	1.6425e-12	4.91107e-10	ko01100	ENSMUSG00000000088;ENSMUSG00000000326;ENSMUSG00000001670;ENSMUSG00000001750;ENSMUSG00000001891;ENSMUSG00000002010;ENSMUSG00000002416;ENSMUSG00000003865;ENSMUSG00000005899;ENSMUSG00000006678;ENSMUSG00000006731;ENSMUSG00000009646;ENSMUSG00000009863;ENSMUSG00000015474;ENSMUSG00000015889;ENSMUSG00000016252;ENSMUSG00000016427;ENSMUSG00000017721;ENSMUSG00000018547;ENSMUSG00000020022;ENSMUSG00000020051;…	K02264+K00545+K00815+K02154+K00963+K00030+K03958+K00693+K12353+K02320+K00725+K01047+K00235+K01074+K01254+K02135+K03945+K05292+K00920+K11352+K00500+K01634+K00025+K00726+K03462+K15728+K17398+K01437+K03016+K01724+K08729+K03937+K18083+K03950+K00413+K00758+K14156+K00700+K17497+K02131+K02137+K03949+K15728+K17726+K12405+K00281+K03103+K13811+K13711+K14454+K01106+K01755+K00857+K00760+K03860+K02136+K00031+…
Metabolism	Energy metabolism	Oxidative phosphorylation	24	136	2.40829e-05	0.0036004	ko00190	ENSMUSG00000000088;ENSMUSG00000001750;ENSMUSG00000002416;ENSMUSG00000009863;ENSMUSG00000016252;ENSMUSG00000016427;ENSMUSG00000020022;ENSMUSG00000021764;ENSMUSG00000022450;ENSMUSG00000022551;ENSMUSG00000022890;ENSMUSG00000022956;ENSMUSG00000023089;ENSMUSG00000025781;ENSMUSG00000026032;ENSMUSG00000026260;ENSMUSG00000029632;ENSMUSG00000030869;ENSMUSG00000035674;ENSMUSG00000035885;ENSMUSG00000040048;…	K02264+K02154+K03958+K00235+K02135+K03945+K11352+K03937+K03950+K00413+K02131+K02137+K03949+K02136+K03959+K03954+K03948+K03955+K03947+K02273+K03966+K03951+K02129+K02265
Human Diseases	Endocrine and metabolic diseases	Non-alcoholic fatty liver disease (NAFLD)	25	152	5.58571e-05	0.0054205	ko04932	ENSMUSG00000000088;ENSMUSG00000002108;ENSMUSG00000002416;ENSMUSG00000005373;ENSMUSG00000009863;ENSMUSG00000016427;ENSMUSG00000017801;ENSMUSG00000020022;ENSMUSG00000020715;ENSMUSG00000021116;ENSMUSG00000021764;ENSMUSG00000022450;ENSMUSG00000022551;ENSMUSG00000023089;ENSMUSG00000026032;ENSMUSG00000026260;ENSMUSG00000029632;ENSMUSG00000030869;ENSMUSG00000035674;ENSMUSG00000035885;ENSMUSG00000038894;…	K02264+K08536+K03958+K09113+K00235+K03945+K09113+K11352+K08852+K03237+K03937+K03950+K00413+K03949+K03959+K03954+K03948+K03955+K03947+K02273+K07187+K03966+K03951+K16172+K02265
Human Diseases	Neurodegenerative diseases	Parkinson disease	24	146	7.9077e-05	0.0054205	ko05012	ENSMUSG00000000088;ENSMUSG00000002416;ENSMUSG00000009863;ENSMUSG00000016252;ENSMUSG00000016427;ENSMUSG00000020022;ENSMUSG00000021764;ENSMUSG00000021771;ENSMUSG00000022450;ENSMUSG00000022551;ENSMUSG00000022890;ENSMUSG00000022956;ENSMUSG00000023089;ENSMUSG00000025781;ENSMUSG00000026032;ENSMUSG00000026260;ENSMUSG00000029632;ENSMUSG00000030869;ENSMUSG00000032562;ENSMUSG00000035674;ENSMUSG00000035885;…	K02264+K03958+K00235+K02135+K03945+K11352+K03937+K15040+K03950+K00413+K02131+K02137+K03949+K02136+K03959+K03954+K03948+K03955+K04630+K03947+K02273+K03966+K03951+K02265
Human Diseases	Neurodegenerative diseases	Huntington disease	29	195	9.72519e-05	0.0054205	ko05016	ENSMUSG00000000088;ENSMUSG00000002416;ENSMUSG00000009863;ENSMUSG00000016252;ENSMUSG00000016427;ENSMUSG00000020022;ENSMUSG00000021018;ENSMUSG00000021764;ENSMUSG00000021771;ENSMUSG00000022450;ENSMUSG00000022521;ENSMUSG00000022551;ENSMUSG00000022890;ENSMUSG00000022956;ENSMUSG00000023089;ENSMUSG00000025781;ENSMUSG00000026032;ENSMUSG00000026260;ENSMUSG00000028478;ENSMUSG00000029104;ENSMUSG00000029632;…	K02264+K03958+K00235+K02135+K03945+K11352+K03016+K03937+K15040+K03950+K04498+K00413+K02131+K02137+K03949+K02136+K03959+K03954+K04644+K04533+K03948+K03955+K03014+K03947+K02273+K11829+K03966+K03951+K02265
Human Diseases	Neurodegenerative diseases	Alzheimer disease	27	177	0.000108773	0.0054205	ko05010	ENSMUSG00000000088;ENSMUSG00000002416;ENSMUSG00000009863;ENSMUSG00000015750;ENSMUSG00000016252;ENSMUSG00000016427;ENSMUSG00000020022;ENSMUSG00000020715;ENSMUSG00000021764;ENSMUSG00000022450;ENSMUSG00000022551;ENSMUSG00000022890;ENSMUSG00000022956;ENSMUSG00000023089;ENSMUSG00000025781;ENSMUSG00000026032;ENSMUSG00000026260;ENSMUSG00000029632;ENSMUSG00000030730;ENSMUSG00000030869;ENSMUSG00000032086;…	K02264+K03958+K00235+K06172+K02135+K03945+K11352+K08852+K03937+K03950+K00413+K02131+K02137+K03949+K02136+K03959+K03954+K03948+K05853+K03955+K04521+K03947+K02273+K03966+K03951+K02265+K04371
Genetic Information Processing	Folding, sorting and degradation	Protein processing in endoplasmic reticulum	25	164	0.000196182	0.00746869	ko04141	ENSMUSG00000015656;ENSMUSG00000020715;ENSMUSG00000020986;ENSMUSG00000021116;ENSMUSG00000021270;ENSMUSG00000024807;ENSMUSG00000025757;ENSMUSG00000025823;ENSMUSG00000025935;ENSMUSG00000027422;ENSMUSG00000028410;ENSMUSG00000028577;ENSMUSG00000029657;ENSMUSG00000030036;ENSMUSG00000030082;ENSMUSG00000031701;ENSMUSG00000031835;ENSMUSG00000032115;ENSMUSG00000032437;ENSMUSG00000036646;ENSMUSG00000040462;…	K03283+K08852+K14006+K03237+K04079+K10601+K09485+K09582+K14010+K14000+K09502+K14018+K09485+K01228+K10956+K09503+K08653+K09486+K07151+K01230+K10088+K14003+K14014+K07342+K03283
Organismal Systems	Environmental adaptation	Thermogenesis	32	233	0.000199831	0.00746869	ko04714	ENSMUSG00000000088;ENSMUSG00000002416;ENSMUSG00000003123;ENSMUSG00000007880;ENSMUSG00000009863;ENSMUSG00000016252;ENSMUSG00000016427;ENSMUSG00000020022;ENSMUSG00000021764;ENSMUSG00000022450;ENSMUSG00000022551;ENSMUSG00000022890;ENSMUSG00000022956;ENSMUSG00000023020;ENSMUSG00000023089;ENSMUSG00000025781;ENSMUSG00000026032;ENSMUSG00000026260;ENSMUSG00000026500;ENSMUSG00000027305;ENSMUSG00000029632;…	K02264+K03958+K07188+K11653+K00235+K02135+K03945+K11352+K03937+K03950+K00413+K02131+K02137+K18181+K03949+K02136+K03959+K03954+K18184+K18159+K03948+K03955+K01897+K04362+K03947+K02273+K11651+K03966+K03951+K02129+K18179+K02265
Metabolism	Xenobiotics biodegradation and metabolism	Drug metabolism - other enzymes	16	89	0.000434223	0.0144259	ko00983	ENSMUSG00000001663;ENSMUSG00000001665;ENSMUSG00000022615;ENSMUSG00000025574;ENSMUSG00000025630;ENSMUSG00000025934;ENSMUSG00000026839;ENSMUSG00000027823;ENSMUSG00000028755;ENSMUSG00000029268;ENSMUSG00000032478;ENSMUSG00000035811;ENSMUSG00000035824;ENSMUSG00000060803;ENSMUSG00000068762;ENSMUSG00000090165	K00799+K00799+K00758+K00857+K00760+K00799+K00757+K01951+K01489+K00699+K00940+K00699+K00857+K00799+K00799+K00699
Human Diseases	Cancers	MicroRNAs in cancer	26	200	0.00175037	0.0523362	ko05206	ENSMUSG00000003031;ENSMUSG00000004936;ENSMUSG00000020661;ENSMUSG00000021546;ENSMUSG00000022521;ENSMUSG00000024014;ENSMUSG00000026435;ENSMUSG00000026842;ENSMUSG00000032366;ENSMUSG00000038894;ENSMUSG00000055980;ENSMUSG00000065405;ENSMUSG00000065408;ENSMUSG00000065453;ENSMUSG00000065490;ENSMUSG00000065493;ENSMUSG00000065519;ENSMUSG00000065523;ENSMUSG00000065551;ENSMUSG00000065564;ENSMUSG00000065574;…	K06624+K04368+K17398+K12886+K04498+K04702+K15379+K06619+K10373+K07187+K16172+K17110+K17183+K16980+K17040+K16982+K16864+K17131+K17178+K16980+K16975+K16989+K16995+K17165+K17001+K16980
Metabolism	Glycan biosynthesis and metabolism	N-Glycan biosynthesis	10	51	0.00260542	0.0708201	ko00510	ENSMUSG00000020346;ENSMUSG00000030036;ENSMUSG00000031286;ENSMUSG00000032123;ENSMUSG00000032437;ENSMUSG00000035704;ENSMUSG00000036620;ENSMUSG00000036646;ENSMUSG00000075470;ENSMUSG00000078919	K00726+K01228+K07432+K01001+K07151+K03849+K00738+K01230+K03850+K00721
Metabolism	Lipid metabolism	Glycerophospholipid metabolism	15	99	0.00381369	0.0950245	ko00564	ENSMUSG00000004270;ENSMUSG00000009646;ENSMUSG00000020593;ENSMUSG00000021518;ENSMUSG00000022617;ENSMUSG00000024052;ENSMUSG00000026922;ENSMUSG00000027346;ENSMUSG00000027695;ENSMUSG00000030275;ENSMUSG00000031545;ENSMUSG00000035596;ENSMUSG00000050860;ENSMUSG00000070644;ENSMUSG00000075703	K13515+K01047+K15728+K08729+K14156+K15728+K13509+K18695+K01115+K00894+K13506+K13516+K06124+K00894+K00993
Metabolism	Glycan biosynthesis and metabolism	Glycosaminoglycan biosynthesis - heparan sulfate / heparin	6	24	0.00543218	0.122617	ko00534	ENSMUSG00000027198;ENSMUSG00000028838;ENSMUSG00000039308;ENSMUSG00000040151;ENSMUSG00000054008;ENSMUSG00000070407	K02367+K02368+K02577+K02513+K02576+K07809
Metabolism	Amino acid metabolism	Cysteine and methionine metabolism	9	48	0.00574128	0.122617	ko00270	ENSMUSG00000001670;ENSMUSG00000020321;ENSMUSG00000020661;ENSMUSG00000025190;ENSMUSG00000029597;ENSMUSG00000032350;ENSMUSG00000042032;ENSMUSG00000053907;ENSMUSG00000071708	K00815+K00025+K17398+K14454+K17989+K11204+K00789+K00789+K00802
Cellular Processes	Cell growth and death	Ferroptosis	8	41	0.00705224	0.140575	ko04216	ENSMUSG00000004270;ENSMUSG00000021771;ENSMUSG00000024661;ENSMUSG00000026389;ENSMUSG00000031278;ENSMUSG00000032350;ENSMUSG00000056234;ENSMUSG00000075706	K13515+K15040+K00522+K10142+K01897+K11204+K09289+K05361
Genetic Information Processing	Transcription	Spliceosome	18	137	0.0075981	0.141989	ko03040	ENSMUSG00000001383;ENSMUSG00000002477;ENSMUSG00000004096;ENSMUSG00000010608;ENSMUSG00000015656;ENSMUSG00000020929;ENSMUSG00000021134;ENSMUSG00000021546;ENSMUSG00000025982;ENSMUSG00000028902;ENSMUSG00000030056;ENSMUSG00000031134;ENSMUSG00000061136;ENSMUSG00000061479;ENSMUSG00000071172;ENSMUSG00000090553;ENSMUSG00000090877;ENSMUSG00000091625	K12848+K11087+K12863+K12822+K03283+K12852+K12893+K12886+K12828+K12827+K12870+K12885+K12821+K11091+K12892+K11097+K03283+K12624
Metabolism	Amino acid metabolism	Phenylalanine, tyrosine and tryptophan biosynthesis	3	7	0.00989813	0.174091	ko00400	ENSMUSG00000001670;ENSMUSG00000020051;ENSMUSG00000025190	K00815+K00500+K14454
Cellular Processes	Transport and catabolism	Mitophagy - animal	10	63	0.0121805	0.202332	ko04137	ENSMUSG00000017686;ENSMUSG00000018567;ENSMUSG00000020130;ENSMUSG00000024387;ENSMUSG00000026672;ENSMUSG00000027363;ENSMUSG00000029500;ENSMUSG00000033124;ENSMUSG00000035158;ENSMUSG00000078566	K07870+K08341+K20168+K03115+K19946+K11839+K15637+K17907+K09455+K15464
Metabolism	Amino acid metabolism	Phenylalanine metabolism	5	22	0.0166371	0.248861	ko00360	ENSMUSG00000001670;ENSMUSG00000020051;ENSMUSG00000024694;ENSMUSG00000025190;ENSMUSG00000063683	K00815+K00500+K00628+K14454+K00628
Metabolism	Metabolism of other amino acids	Glutathione metabolism	10	66	0.0166462	0.248861	ko00480	ENSMUSG00000001663;ENSMUSG00000001665;ENSMUSG00000025934;ENSMUSG00000025950;ENSMUSG00000032350;ENSMUSG00000057103;ENSMUSG00000060803;ENSMUSG00000068762;ENSMUSG00000071708;ENSMUSG00000075706	K00799+K00799+K00799+K00031+K11204+K20838+K00799+K00799+K00802+K05361
Metabolism	Global and overview maps	Carbon metabolism	15	119	0.0200076	0.270948	ko01200	ENSMUSG00000002010;ENSMUSG00000009863;ENSMUSG00000020321;ENSMUSG00000024827;ENSMUSG00000025190;ENSMUSG00000025950;ENSMUSG00000025991;ENSMUSG00000026526;ENSMUSG00000027261;ENSMUSG00000029009;ENSMUSG00000029597;ENSMUSG00000032047;ENSMUSG00000041426;ENSMUSG00000041798;ENSMUSG00000043445	K00030+K00235+K00025+K00281+K14454+K00031+K01948+K01679+K11517+K00297+K17989+K00626+K05605+K12407+K19269
Metabolism	Global and overview maps	Biosynthesis of amino acids	11	78	0.0204498	0.270948	ko01230	ENSMUSG00000001670;ENSMUSG00000002010;ENSMUSG00000020051;ENSMUSG00000025190;ENSMUSG00000025533;ENSMUSG00000025950;ENSMUSG00000025991;ENSMUSG00000029597;ENSMUSG00000031173;ENSMUSG00000042032;ENSMUSG00000053907	K00815+K00030+K00500+K14454+K01755+K00031+K01948+K17989+K00611+K00789+K00789
Metabolism	Carbohydrate metabolism	Citrate cycle (TCA cycle)	6	32	0.0226469	0.270948	ko00020	ENSMUSG00000002010;ENSMUSG00000009863;ENSMUSG00000020321;ENSMUSG00000025950;ENSMUSG00000026526;ENSMUSG00000027513	K00030+K00235+K00025+K00031+K01679+K01596
Metabolism	Lipid metabolism	Fatty acid elongation	6	32	0.0226469	0.270948	ko00062	ENSMUSG00000015474;ENSMUSG00000035376;ENSMUSG00000036880;ENSMUSG00000038754;ENSMUSG00000041220;ENSMUSG00000052392	K01074+K10703+K07508+K10248+K10203+K01068
Metabolism	Lipid metabolism	Primary bile acid biosynthesis	4	16	0.0226545	0.270948	ko00120	ENSMUSG00000024507;ENSMUSG00000030382;ENSMUSG00000042289;ENSMUSG00000050445	K12405+K08748+K12408+K07431
Metabolism	Xenobiotics biodegradation and metabolism	Drug metabolism - cytochrome P450	10	70	0.0243503	0.280028	ko00982	ENSMUSG00000001663;ENSMUSG00000001665;ENSMUSG00000025934;ENSMUSG00000028088;ENSMUSG00000029268;ENSMUSG00000032310;ENSMUSG00000035811;ENSMUSG00000060803;ENSMUSG00000068762;ENSMUSG00000090165	K00799+K00799+K00799+K00485+K00699+K07409+K00699+K00799+K00799+K00699
Metabolism	Global and overview maps	Fatty acid metabolism	8	51	0.0253496	0.280724	ko01212	ENSMUSG00000015474;ENSMUSG00000026003;ENSMUSG00000031278;ENSMUSG00000032047;ENSMUSG00000035376;ENSMUSG00000036880;ENSMUSG00000041220;ENSMUSG00000048755	K01074+K00255+K01897+K00626+K10703+K07508+K10203+K00645
Human Diseases	Endocrine and metabolic diseases	Insulin resistance	14	114	0.0294345	0.314318	ko04931	ENSMUSG00000002108;ENSMUSG00000003865;ENSMUSG00000005373;ENSMUSG00000017801;ENSMUSG00000027513;ENSMUSG00000030244;ENSMUSG00000030382;ENSMUSG00000033295;ENSMUSG00000033871;ENSMUSG00000038894;ENSMUSG00000055980;ENSMUSG00000059316;ENSMUSG00000060601;ENSMUSG00000067279	K08536+K00693+K09113+K09113+K01596+K00693+K08748+K05695+K17962+K07187+K16172+K08745+K08535+K07189
Metabolism	Carbohydrate metabolism	Starch and sucrose metabolism	6	35	0.0339504	0.339484	ko00500	ENSMUSG00000001891;ENSMUSG00000003865;ENSMUSG00000022707;ENSMUSG00000030244;ENSMUSG00000041798;ENSMUSG00000096770	K00963+K00693+K00700+K00693+K12407+K01176
Metabolism	Glycan biosynthesis and metabolism	Other glycan degradation	4	18	0.0340619	0.339484	ko00511	ENSMUSG00000005142;ENSMUSG00000007038;ENSMUSG00000029119;ENSMUSG00000031521	K12311+K01186+K12312+K01444
Organismal Systems	Endocrine system	PPAR signaling pathway	11	85	0.0360761	0.34796	ko03320	ENSMUSG00000002108;ENSMUSG00000002289;ENSMUSG00000008348;ENSMUSG00000023057;ENSMUSG00000026003;ENSMUSG00000027513;ENSMUSG00000030382;ENSMUSG00000031278;ENSMUSG00000050445;ENSMUSG00000059316;ENSMUSG00000084346	K08536+K08767+K08770+K08751+K00255+K01596+K08748+K01897+K07431+K08745+K07425
Metabolism	Amino acid metabolism	Arginine biosynthesis	4	19	0.0408106	0.359816	ko00220	ENSMUSG00000025190;ENSMUSG00000025533;ENSMUSG00000025991;ENSMUSG00000031173	K14454+K01755+K01948+K00611
Metabolism	Global and overview maps	2-Oxocarboxylic acid metabolism	4	19	0.0408106	0.359816	ko01210	ENSMUSG00000002010;ENSMUSG00000025190;ENSMUSG00000025950;ENSMUSG00000057228	K00030+K14454+K00031+K00825
Genetic Information Processing	Folding, sorting and degradation	Proteasome	7	46	0.0409156	0.359816	ko03050	ENSMUSG00000020708;ENSMUSG00000021024;ENSMUSG00000021737;ENSMUSG00000026914;ENSMUSG00000029649;ENSMUSG00000042541;ENSMUSG00000096727	K03066+K02730+K03037+K03030+K11599+K10881+K02741
Genetic Information Processing	Folding, sorting and degradation	Protein export	5	28	0.0438731	0.365862	ko03060	ENSMUSG00000030082;ENSMUSG00000054408;ENSMUSG00000073079;ENSMUSG00000078974;ENSMUSG00000112449	K10956+K12948+K03106+K07342+K03106
Cellular Processes	Transport and catabolism	Peroxisome	11	88	0.0448316	0.365862	ko04146	ENSMUSG00000000876;ENSMUSG00000020283;ENSMUSG00000021417;ENSMUSG00000024507;ENSMUSG00000025950;ENSMUSG00000026664;ENSMUSG00000027261;ENSMUSG00000028672;ENSMUSG00000028691;ENSMUSG00000031278;ENSMUSG00000031378	K13350+K13344+K13239+K12405+K00031+K00477+K11517+K01640+K13279+K01897+K05675
Environmental Information Processing	Membrane transport	ABC transporters	7	47	0.0452739	0.365862	ko02010	ENSMUSG00000026198;ENSMUSG00000026944;ENSMUSG00000027048;ENSMUSG00000031378;ENSMUSG00000031974;ENSMUSG00000037321;ENSMUSG00000040505	K05661+K05642+K05664+K05675+K05657+K05653+K05683
Metabolism	Xenobiotics biodegradation and metabolism	Metabolism of xenobiotics by cytochrome P450	9	68	0.0486148	0.382522	ko00980	ENSMUSG00000001663;ENSMUSG00000001665;ENSMUSG00000025934;ENSMUSG00000029268;ENSMUSG00000032310;ENSMUSG00000035811;ENSMUSG00000060803;ENSMUSG00000068762;ENSMUSG00000090165	K00799+K00799+K00799+K00699+K07409+K00699+K00799+K00799+K00699
Cellular Processes	Transport and catabolism	Autophagy - animal	15	135	0.0531555	0.407525	ko04140	ENSMUSG00000003068;ENSMUSG00000004936;ENSMUSG00000018171;ENSMUSG00000018567;ENSMUSG00000020715;ENSMUSG00000021116;ENSMUSG00000021559;ENSMUSG00000027164;ENSMUSG00000033124;ENSMUSG00000034354;ENSMUSG00000038375;ENSMUSG00000038894;ENSMUSG00000055980;ENSMUSG00000063065;ENSMUSG00000078566	K07298+K04368+K21248+K08341+K08852+K03237+K08803+K03175+K17907+K18082+K21247+K07187+K16172+K04371+K15464
Genetic Information Processing	Translation	Ribosome	15	136	0.0560449	0.410406	ko03010	ENSMUSG00000016833;ENSMUSG00000019710;ENSMUSG00000022370;ENSMUSG00000030045;ENSMUSG00000030879;ENSMUSG00000031320;ENSMUSG00000032518;ENSMUSG00000039680;ENSMUSG00000049751;ENSMUSG00000052962;ENSMUSG00000057322;ENSMUSG00000057863;ENSMUSG00000058267;ENSMUSG00000062997;ENSMUSG00000067288	K02963+K02895+K02871+K02884+K02879+K02987+K02998+K02990+K02929+K02916+K02923+K02920+K02954+K02918+K02979
Metabolism	Carbohydrate metabolism	Glyoxylate and dicarboxylate metabolism	5	30	0.0567229	0.410406	ko00630	ENSMUSG00000020321;ENSMUSG00000024827;ENSMUSG00000027261;ENSMUSG00000032047;ENSMUSG00000043445	K00025+K00281+K11517+K00626+K19269
Organismal Systems	Digestive system	Fat digestion and absorption	6	40	0.0598086	0.410406	ko04975	ENSMUSG00000009646;ENSMUSG00000023057;ENSMUSG00000026922;ENSMUSG00000037936;ENSMUSG00000040505;ENSMUSG00000059316	K01047+K08751+K13509+K13885+K05683+K08745
Metabolism	Lipid metabolism	Fatty acid degradation	7	50	0.0600863	0.410406	ko00071	ENSMUSG00000021417;ENSMUSG00000024132;ENSMUSG00000026003;ENSMUSG00000031278;ENSMUSG00000032047;ENSMUSG00000036880;ENSMUSG00000084346	K13239+K13238+K00255+K01897+K00626+K07508+K07425
Organismal Systems	Digestive system	Bile secretion	9	71	0.0611096	0.410406	ko04976	ENSMUSG00000023829;ENSMUSG00000027048;ENSMUSG00000030382;ENSMUSG00000030762;ENSMUSG00000037936;ENSMUSG00000040505;ENSMUSG00000047638;ENSMUSG00000060961;ENSMUSG00000067144	K08198+K05664+K08748+K09869+K13885+K05683+K08537+K13575+K08204
Metabolism	Biosynthesis of other secondary metabolites	Caffeine metabolism	2	6	0.0617668	0.410406	ko00232	ENSMUSG00000028186;ENSMUSG00000032310	K00365+K07409
Organismal Systems	Nervous system	Retrograde endocannabinoid signaling	16	150	0.0635476	0.411611	ko04723	ENSMUSG00000002416;ENSMUSG00000016427;ENSMUSG00000020022;ENSMUSG00000021764;ENSMUSG00000022450;ENSMUSG00000023089;ENSMUSG00000026032;ENSMUSG00000026260;ENSMUSG00000029632;ENSMUSG00000030869;ENSMUSG00000032562;ENSMUSG00000035674;ENSMUSG00000036402;ENSMUSG00000040048;ENSMUSG00000041881;ENSMUSG00000063065	K03958+K03945+K11352+K03937+K03950+K03949+K03959+K03954+K03948+K03955+K04630+K03947+K04347+K03966+K03951+K04371
Metabolism	Metabolism of cofactors and vitamins	Porphyrin and chlorophyll metabolism	6	41	0.066078	0.411611	ko00860	ENSMUSG00000026615;ENSMUSG00000029268;ENSMUSG00000029575;ENSMUSG00000032786;ENSMUSG00000035811;ENSMUSG00000090165	K14163+K00699+K00798+K00643+K00699+K00699
Human Diseases	Cancers	Bladder cancer	6	41	0.066078	0.411611	ko05219	ENSMUSG00000000303;ENSMUSG00000001127;ENSMUSG00000004936;ENSMUSG00000021559;ENSMUSG00000022615;ENSMUSG00000063065	K05689+K08845+K04368+K08803+K00758+K04371
Human Diseases	Cancers	Chemical carcinogenesis	11	96	0.0749678	0.440304	ko05204	ENSMUSG00000001663;ENSMUSG00000001665;ENSMUSG00000025934;ENSMUSG00000029268;ENSMUSG00000029630;ENSMUSG00000032310;ENSMUSG00000035811;ENSMUSG00000040660;ENSMUSG00000060803;ENSMUSG00000068762;ENSMUSG00000090165	K00799+K00799+K00799+K00699+K07424+K07409+K00699+K07412+K00799+K00799+K00699
Genetic Information Processing	Translation	RNA transport	17	166	0.0773002	0.440304	ko03013	ENSMUSG00000016554;ENSMUSG00000020290;ENSMUSG00000021116;ENSMUSG00000022855;ENSMUSG00000027905;ENSMUSG00000028156;ENSMUSG00000028683;ENSMUSG00000034274;ENSMUSG00000043424;ENSMUSG00000051329;ENSMUSG00000053293;ENSMUSG00000053453;ENSMUSG00000056076;ENSMUSG00000059796;ENSMUSG00000070319;ENSMUSG00000074656;ENSMUSG00000090264	K03251+K14290+K03237+K03345+K13131+K03259+K03241+K13174+K03245+K14303+K14316+K13176+K03253+K03257+K03248+K03238+K18645
Cellular Processes	Transport and catabolism	Endocytosis	25	263	0.0779579	0.440304	ko04144	ENSMUSG00000004771;ENSMUSG00000005320;ENSMUSG00000006740;ENSMUSG00000015656;ENSMUSG00000018909;ENSMUSG00000020440;ENSMUSG00000022808;ENSMUSG00000024101;ENSMUSG00000024381;ENSMUSG00000024589;ENSMUSG00000027164;ENSMUSG00000027255;ENSMUSG00000027363;ENSMUSG00000027423;ENSMUSG00000027519;ENSMUSG00000027695;ENSMUSG00000028478;ENSMUSG00000030849;ENSMUSG00000031450;ENSMUSG00000031696;ENSMUSG00000032812;…	K07904+K05095+K10396+K03283+K04439+K07940+K17919+K18461+K12562+K13305+K03175+K12493+K11839+K17920+K07891+K01115+K04644+K05093+K00909+K18468+K18439+K19475+K08291+K08291+K03283
Organismal Systems	Circulatory system	Vascular smooth muscle contraction	14	131	0.0780233	0.440304	ko04270	ENSMUSG00000001127;ENSMUSG00000004936;ENSMUSG00000009646;ENSMUSG00000018830;ENSMUSG00000020123;ENSMUSG00000020580;ENSMUSG00000020611;ENSMUSG00000028469;ENSMUSG00000041977;ENSMUSG00000045875;ENSMUSG00000049115;ENSMUSG00000063065;ENSMUSG00000084346;ENSMUSG00000090841	K08845+K04368+K01047+K10352+K04226+K17388+K04639+K12324+K12331+K04135+K04166+K04371+K07425+K12751
Human Diseases	Cancers	Pathways in cancer	47	541	0.0780472	0.440304	ko05200	ENSMUSG00000000303;ENSMUSG00000001127;ENSMUSG00000001507;ENSMUSG00000001663;ENSMUSG00000001665;ENSMUSG00000003031;ENSMUSG00000003233;ENSMUSG00000004221;ENSMUSG00000004936;ENSMUSG00000005320;ENSMUSG00000009681;ENSMUSG00000020580;ENSMUSG00000020611;ENSMUSG00000020647;ENSMUSG00000021270;ENSMUSG00000021559;ENSMUSG00000021820;ENSMUSG00000022521;ENSMUSG00000022607;ENSMUSG00000022757;ENSMUSG00000022965;…	K05689+K08845+K06482+K00799+K00799+K06624+K02353+K07210+K04368+K05095+K08878+K17388+K04639+K09101+K04079+K08803+K04515+K04498+K05725+K09292+K05133+K05130+K04702+K02157+K03068+K00799+K05717+K01679+K06619+K03175+K06052+K08774+K05093+K04362+K04630+K09455+K04347+K02375+K02432+K12331+K04166+K09289+K04515+K00799+K04371+K06231+K00799
Organismal Systems	Digestive system	Vitamin digestion and absorption	4	24	0.0849341	0.466582	ko04977	ENSMUSG00000001436;ENSMUSG00000020432;ENSMUSG00000020829;ENSMUSG00000037936	K14609+K14619+K14613+K13885
Organismal Systems	Endocrine system	Parathyroid hormone synthesis, secretion and action	12	110	0.0868302	0.466582	ko04928	ENSMUSG00000001127;ENSMUSG00000004936;ENSMUSG00000018909;ENSMUSG00000020611;ENSMUSG00000024913;ENSMUSG00000027695;ENSMUSG00000028525;ENSMUSG00000031565;ENSMUSG00000032562;ENSMUSG00000041977;ENSMUSG00000063065;ENSMUSG00000074622	K08845+K04368+K04439+K04639+K03068+K01115+K13293+K04362+K04630+K12331+K04371+K09036
Metabolism	Carbohydrate metabolism	Pentose and glucuronate interconversions	5	34	0.0882047	0.466582	ko00040	ENSMUSG00000001891;ENSMUSG00000027227;ENSMUSG00000029268;ENSMUSG00000035811;ENSMUSG00000090165	K00963+K00008+K00699+K00699+K00699
Human Diseases	Cancers	Prostate cancer	11	99	0.0889471	0.466582	ko05215	ENSMUSG00000001127;ENSMUSG00000003031;ENSMUSG00000004221;ENSMUSG00000004936;ENSMUSG00000021270;ENSMUSG00000022521;ENSMUSG00000029999;ENSMUSG00000030849;ENSMUSG00000031565;ENSMUSG00000060803;ENSMUSG00000063065	K08845+K06624+K07210+K04368+K04079+K04498+K08774+K05093+K04362+K00799+K04371
Metabolism	Carbohydrate metabolism	Fructose and mannose metabolism	5	35	0.097247	0.501325	ko00051	ENSMUSG00000022711;ENSMUSG00000025271;ENSMUSG00000026773;ENSMUSG00000027227;ENSMUSG00000029162	K17497+K19028+K01103+K00008+K00846
Human Diseases	Endocrine and metabolic diseases	Cushing syndrome	16	161	0.103597	0.525007	ko04934	ENSMUSG00000003031;ENSMUSG00000003233;ENSMUSG00000004936;ENSMUSG00000021820;ENSMUSG00000024182;ENSMUSG00000026526;ENSMUSG00000027363;ENSMUSG00000032562;ENSMUSG00000036904;ENSMUSG00000037936;ENSMUSG00000039956;ENSMUSG00000041075;ENSMUSG00000048154;ENSMUSG00000049115;ENSMUSG00000057897;ENSMUSG00000063065	K06624+K02353+K04368+K04515+K02157+K01679+K11839+K04630+K02375+K13885+K22398+K02432+K09187+K04166+K04515+K04371
Metabolism	Amino acid metabolism	Alanine, aspartate and glutamate metabolism	5	36	0.106738	0.531912	ko00250	ENSMUSG00000020774;ENSMUSG00000025190;ENSMUSG00000025533;ENSMUSG00000025991;ENSMUSG00000029246	K01437+K14454+K01755+K01948+K00764
Genetic Information Processing	Translation	Ribosome biogenesis in eukaryotes	9	80	0.109977	0.539067	ko03008	ENSMUSG00000020290;ENSMUSG00000021149;ENSMUSG00000024387;ENSMUSG00000026127;ENSMUSG00000027133;ENSMUSG00000027722;ENSMUSG00000028869;ENSMUSG00000032026;ENSMUSG00000088088	K14290+K06943+K03115+K14561+K11130+K14575+K14537+K13288+K14576
Metabolism	Amino acid metabolism	Lysine degradation	7	58	0.112564	0.542848	ko00310	ENSMUSG00000006307;ENSMUSG00000032047;ENSMUSG00000038056;ENSMUSG00000038384;ENSMUSG00000041660;ENSMUSG00000048154;ENSMUSG00000057228	K14959+K00626+K09188+K11422+K00471+K09187+K00825
Human Diseases	Cancers	Thyroid cancer	5	37	0.116665	0.553694	ko05216	ENSMUSG00000000303;ENSMUSG00000004936;ENSMUSG00000022757;ENSMUSG00000056234;ENSMUSG00000063065	K05689+K04368+K09292+K09289+K04371
Metabolism	Lipid metabolism	Sphingolipid metabolism	6	48	0.120121	0.561191	ko00600	ENSMUSG00000005899;ENSMUSG00000007038;ENSMUSG00000020097;ENSMUSG00000021054;ENSMUSG00000050931;ENSMUSG00000057342	K12353+K01186+K01634+K04716+K04714+K04718
Human Diseases	Cancers	Hepatocellular carcinoma	17	178	0.124787	0.574022	ko05225	ENSMUSG00000001127;ENSMUSG00000001663;ENSMUSG00000001665;ENSMUSG00000003233;ENSMUSG00000004936;ENSMUSG00000007880;ENSMUSG00000024182;ENSMUSG00000024913;ENSMUSG00000025934;ENSMUSG00000029999;ENSMUSG00000033237;ENSMUSG00000036904;ENSMUSG00000037935;ENSMUSG00000041075;ENSMUSG00000060803;ENSMUSG00000063065;ENSMUSG00000068762	K08845+K00799+K00799+K02353+K04368+K11653+K02157+K03068+K00799+K08774+K11765+K02375+K11651+K02432+K00799+K04371+K00799
Organismal Systems	Digestive system	Cholesterol metabolism	6	49	0.129228	0.585442	ko04979	ENSMUSG00000002289;ENSMUSG00000021771;ENSMUSG00000024091;ENSMUSG00000027048;ENSMUSG00000037936;ENSMUSG00000040505	K08767+K15040+K06096+K05664+K13885+K05683
Cellular Processes	Cellular community - eukaryotes	Adherens junction	8	73	0.141682	0.632284	ko04520	ENSMUSG00000000303;ENSMUSG00000022521;ENSMUSG00000024387;ENSMUSG00000028868;ENSMUSG00000031565;ENSMUSG00000032012;ENSMUSG00000033295;ENSMUSG00000063065	K05689+K04498+K03115+K05748+K04362+K06081+K05695+K04371
Human Diseases	Drug resistance	Antifolate resistance	4	30	0.158309	0.681563	ko01523	ENSMUSG00000001436;ENSMUSG00000004221;ENSMUSG00000020829;ENSMUSG00000029009	K14609+K07210+K14613+K00297
Organismal Systems	Environmental adaptation	Circadian rhythm	4	30	0.158309	0.681563	ko04710	ENSMUSG00000026077;ENSMUSG00000029238;ENSMUSG00000055116;ENSMUSG00000055866	K09026+K02223+K02296+K02633
Environmental Information Processing	Signal transduction	ErbB signaling pathway	9	87	0.159563	0.681563	ko04012	ENSMUSG00000001127;ENSMUSG00000003031;ENSMUSG00000004936;ENSMUSG00000021820;ENSMUSG00000022607;ENSMUSG00000026842;ENSMUSG00000029999;ENSMUSG00000057897;ENSMUSG00000063065	K08845+K06624+K04368+K04515+K05725+K06619+K08774+K04515+K04371
Cellular Processes	Transport and catabolism	Lysosome	12	124	0.165017	0.69419	ko04142	ENSMUSG00000001750;ENSMUSG00000005142;ENSMUSG00000007038;ENSMUSG00000015474;ENSMUSG00000021824;ENSMUSG00000026944;ENSMUSG00000028478;ENSMUSG00000030101;ENSMUSG00000030560;ENSMUSG00000030894;ENSMUSG00000031521;ENSMUSG00000037260	K02154+K12311+K01186+K01074+K12398+K05642+K04644+K13444+K01275+K01279+K01444+K10532
Metabolism	Nucleotide metabolism	Pyrimidine metabolism	10	100	0.167312	0.69419	ko00240	ENSMUSG00000006678;ENSMUSG00000021018;ENSMUSG00000022615;ENSMUSG00000025574;ENSMUSG00000026839;ENSMUSG00000028755;ENSMUSG00000032478;ENSMUSG00000033020;ENSMUSG00000035824;ENSMUSG00000073016	K02320+K03016+K00758+K00857+K00757+K01489+K00940+K03014+K00857+K00761
Environmental Information Processing	Signal transduction	FoxO signaling pathway	13	137	0.169485	0.69419	ko04068	ENSMUSG00000001127;ENSMUSG00000003031;ENSMUSG00000003068;ENSMUSG00000004936;ENSMUSG00000007617;ENSMUSG00000018567;ENSMUSG00000022521;ENSMUSG00000025813;ENSMUSG00000027513;ENSMUSG00000038894;ENSMUSG00000055980;ENSMUSG00000063065;ENSMUSG00000078566	K08845+K06624+K07298+K04368+K15010+K08341+K04498+K15010+K01596+K07187+K16172+K04371+K15464
Environmental Information Processing	Signal transduction	Apelin signaling pathway	13	138	0.175884	0.710665	ko04371	ENSMUSG00000000303;ENSMUSG00000003123;ENSMUSG00000004936;ENSMUSG00000018567;ENSMUSG00000020611;ENSMUSG00000027276;ENSMUSG00000029304;ENSMUSG00000030592;ENSMUSG00000032562;ENSMUSG00000036402;ENSMUSG00000049115;ENSMUSG00000057342;ENSMUSG00000063065	K05689+K07188+K04368+K08341+K04639+K06052+K06250+K04961+K04630+K04347+K04166+K04718+K04371
Metabolism	Lipid metabolism	Synthesis and degradation of ketone bodies	2	11	0.179727	0.71651	ko00072	ENSMUSG00000028672;ENSMUSG00000032047	K01640+K00626
Cellular Processes	Cellular community - eukaryotes	Signaling pathways regulating pluripotency of stem cells	13	139	0.1824	0.7176	ko04550	ENSMUSG00000003233;ENSMUSG00000004936;ENSMUSG00000005320;ENSMUSG00000020644;ENSMUSG00000021796;ENSMUSG00000024182;ENSMUSG00000025405;ENSMUSG00000030849;ENSMUSG00000031565;ENSMUSG00000036904;ENSMUSG00000038872;ENSMUSG00000041075;ENSMUSG00000063065	K02353+K04368+K05095+K17693+K04673+K02157+K22688+K05093+K04362+K02375+K09378+K02432+K04371
Organismal Systems	Endocrine system	Melanogenesis	10	103	0.190262	0.736022	ko04916	ENSMUSG00000003233;ENSMUSG00000004936;ENSMUSG00000021820;ENSMUSG00000022521;ENSMUSG00000032562;ENSMUSG00000035158;ENSMUSG00000036904;ENSMUSG00000041075;ENSMUSG00000057897;ENSMUSG00000063065	K02353+K04368+K04515+K04498+K04630+K09455+K02375+K02432+K04515+K04371
Metabolism	Metabolism of cofactors and vitamins	Retinol metabolism	9	91	0.192006	0.736022	ko00830	ENSMUSG00000029268;ENSMUSG00000029630;ENSMUSG00000032310;ENSMUSG00000035811;ENSMUSG00000040660;ENSMUSG00000056666;ENSMUSG00000060407;ENSMUSG00000084346;ENSMUSG00000090165	K00699+K07424+K07409+K00699+K07412+K09516+K07411+K07425+K00699
Organismal Systems	Excretory system	Proximal tubule bicarbonate reclamation	3	22	0.200272	0.749935	ko04964	ENSMUSG00000020321;ENSMUSG00000027513;ENSMUSG00000060961	K00025+K01596+K13575
Cellular Processes	Cellular community - eukaryotes	Tight junction	15	167	0.200652	0.749935	ko04530	ENSMUSG00000003068;ENSMUSG00000018830;ENSMUSG00000020536;ENSMUSG00000020580;ENSMUSG00000021636;ENSMUSG00000022512;ENSMUSG00000023004;ENSMUSG00000024589;ENSMUSG00000033196;ENSMUSG00000034917;ENSMUSG00000043079;ENSMUSG00000056328;ENSMUSG00000068876;ENSMUSG00000070473;ENSMUSG00000090841	K07298+K10352+K06094+K17388+K17291+K06087+K07374+K13305+K10352+K06097+K21112+K10352+K06102+K06087+K12751
Metabolism	Amino acid metabolism	Tryptophan metabolism	5	45	0.209663	0.773941	ko00380	ENSMUSG00000003477;ENSMUSG00000028011;ENSMUSG00000032047;ENSMUSG00000032310;ENSMUSG00000057228	K00562+K00453+K00626+K07409+K00825
Human Diseases	Neurodegenerative diseases	Prion diseases	4	34	0.216568	0.780459	ko05020	ENSMUSG00000004936;ENSMUSG00000024966;ENSMUSG00000036896;ENSMUSG00000063065	K04368+K09553+K03988+K04371
Organismal Systems	Endocrine system	Insulin signaling pathway	13	144	0.216649	0.780459	ko04910	ENSMUSG00000001127;ENSMUSG00000003123;ENSMUSG00000003865;ENSMUSG00000004936;ENSMUSG00000027513;ENSMUSG00000028156;ENSMUSG00000030244;ENSMUSG00000033295;ENSMUSG00000038894;ENSMUSG00000041798;ENSMUSG00000055980;ENSMUSG00000063065;ENSMUSG00000067279	K08845+K07188+K00693+K04368+K01596+K03259+K00693+K05695+K07187+K12407+K16172+K04371+K07189
Environmental Information Processing	Signal transduction	cGMP - PKG signaling pathway	15	170	0.220017	0.783156	ko04022	ENSMUSG00000004936;ENSMUSG00000015605;ENSMUSG00000020580;ENSMUSG00000020611;ENSMUSG00000021771;ENSMUSG00000028469;ENSMUSG00000030302;ENSMUSG00000030730;ENSMUSG00000032562;ENSMUSG00000038894;ENSMUSG00000045875;ENSMUSG00000049115;ENSMUSG00000055980;ENSMUSG00000058620;ENSMUSG00000063065	K04368+K04378+K17388+K04639+K15040+K12324+K05850+K05853+K04630+K07187+K04135+K04166+K16172+K04139+K04371
Organismal Systems	Digestive system	Mineral absorption	5	47	0.235936	0.829939	ko04978	ENSMUSG00000015653;ENSMUSG00000020829;ENSMUSG00000024661;ENSMUSG00000031765;ENSMUSG00000037434	K14738+K14613+K00522+K14739+K14688
Metabolism	Carbohydrate metabolism	Inositol phosphate metabolism	7	72	0.244707	0.840422	ko00562	ENSMUSG00000018547;ENSMUSG00000021987;ENSMUSG00000024896;ENSMUSG00000025178;ENSMUSG00000025477;ENSMUSG00000034354;ENSMUSG00000038861	K00920+K18083+K03103+K13711+K01106+K18082+K19801
Organismal Systems	Nervous system	Neurotrophin signaling pathway	11	123	0.250964	0.840422	ko04722	ENSMUSG00000004936;ENSMUSG00000016528;ENSMUSG00000020849;ENSMUSG00000021820;ENSMUSG00000026842;ENSMUSG00000027164;ENSMUSG00000041135;ENSMUSG00000055980;ENSMUSG00000057897;ENSMUSG00000060477;ENSMUSG00000063065	K04368+K04443+K06630+K04515+K06619+K03175+K08846+K16172+K04515+K04731+K04371
Metabolism	Amino acid metabolism	Valine, leucine and isoleucine biosynthesis	1	4	0.254047	0.840422	ko00290	ENSMUSG00000029597	K17989
Environmental Information Processing	Signal transduction	Sphingolipid signaling pathway	11	124	0.25933	0.840422	ko04071	ENSMUSG00000004936;ENSMUSG00000020097;ENSMUSG00000020580;ENSMUSG00000020611;ENSMUSG00000021054;ENSMUSG00000024777;ENSMUSG00000027695;ENSMUSG00000032562;ENSMUSG00000050931;ENSMUSG00000057342;ENSMUSG00000063065	K04368+K01634+K17388+K04639+K04716+K11584+K01115+K04630+K04714+K04718+K04371
Metabolism	Lipid metabolism	Fatty acid biosynthesis	2	14	0.259836	0.840422	ko00061	ENSMUSG00000031278;ENSMUSG00000048755	K01897+K00645
Metabolism	Glycan biosynthesis and metabolism	Glycosaminoglycan biosynthesis - keratan sulfate	2	14	0.259836	0.840422	ko00533	ENSMUSG00000028538;ENSMUSG00000051650	K00781+K00741
Organismal Systems	Nervous system	Long-term depression	6	61	0.259979	0.840422	ko04730	ENSMUSG00000001127;ENSMUSG00000004936;ENSMUSG00000020611;ENSMUSG00000030592;ENSMUSG00000032562;ENSMUSG00000063065	K08845+K04368+K04639+K04961+K04630+K04371
Environmental Information Processing	Signal transduction	Notch signaling pathway	5	49	0.263059	0.840422	ko04330	ENSMUSG00000003233;ENSMUSG00000015750;ENSMUSG00000022521;ENSMUSG00000027276;ENSMUSG00000039982	K02353+K06172+K04498+K06052+K06058
Organismal Systems	Immune system	Toll-like receptor signaling pathway	9	99	0.264213	0.840422	ko04620	ENSMUSG00000004221;ENSMUSG00000004936;ENSMUSG00000016024;ENSMUSG00000022967;ENSMUSG00000027164;ENSMUSG00000029304;ENSMUSG00000032041;ENSMUSG00000063065;ENSMUSG00000079164	K07210+K04368+K05399+K05130+K03175+K06250+K05403+K04371+K10168
Human Diseases	Infectious diseases	Tuberculosis	15	178	0.275261	0.849886	ko05152	ENSMUSG00000001750;ENSMUSG00000005774;ENSMUSG00000016024;ENSMUSG00000021820;ENSMUSG00000022521;ENSMUSG00000022965;ENSMUSG00000024164;ENSMUSG00000024359;ENSMUSG00000027164;ENSMUSG00000032041;ENSMUSG00000041135;ENSMUSG00000057342;ENSMUSG00000057897;ENSMUSG00000060477;ENSMUSG00000063065	K02154+K08061+K05399+K04515+K04498+K05133+K03990+K04043+K03175+K05403+K08846+K04718+K04515+K04731+K04371
Metabolism	Carbohydrate metabolism	Amino sugar and nucleotide sugar metabolism	5	50	0.276881	0.849886	ko00520	ENSMUSG00000001891;ENSMUSG00000022711;ENSMUSG00000028479;ENSMUSG00000041798;ENSMUSG00000056131	K00963+K17497+K12409+K12407+K01836
Human Diseases	Infectious diseases	Bacterial invasion of epithelial cells	7	75	0.277897	0.849886	ko05100	ENSMUSG00000000303;ENSMUSG00000022607;ENSMUSG00000026193;ENSMUSG00000028478;ENSMUSG00000028868;ENSMUSG00000029003;ENSMUSG00000036885	K05689+K05725+K05717+K04644+K05748+K13728+K13744
Metabolism	Carbohydrate metabolism	Pyruvate metabolism	4	38	0.279548	0.849886	ko00620	ENSMUSG00000020321;ENSMUSG00000026526;ENSMUSG00000027513;ENSMUSG00000032047	K00025+K01679+K01596+K00626
Metabolism	Lipid metabolism	Steroid hormone biosynthesis	8	88	0.2814	0.849886	ko00140	ENSMUSG00000000326;ENSMUSG00000022445;ENSMUSG00000029268;ENSMUSG00000029630;ENSMUSG00000032310;ENSMUSG00000035811;ENSMUSG00000040660;ENSMUSG00000090165	K00545+K07414+K00699+K07424+K07409+K00699+K07412+K00699
Metabolism	Glycan biosynthesis and metabolism	Glycosphingolipid biosynthesis - ganglio series	2	15	0.286813	0.85757	ko00604	ENSMUSG00000006731;ENSMUSG00000056091	K00725+K03370
Environmental Information Processing	Signal transduction	AMPK signaling pathway	11	128	0.293681	0.861551	ko04152	ENSMUSG00000003068;ENSMUSG00000003123;ENSMUSG00000003865;ENSMUSG00000024777;ENSMUSG00000025271;ENSMUSG00000026773;ENSMUSG00000027513;ENSMUSG00000030244;ENSMUSG00000038894;ENSMUSG00000045875;ENSMUSG00000055980	K07298+K07188+K00693+K11584+K19028+K01103+K01596+K00693+K07187+K04135+K16172
Metabolism	Carbohydrate metabolism	Ascorbate and aldarate metabolism	3	27	0.297109	0.861551	ko00053	ENSMUSG00000029268;ENSMUSG00000035811;ENSMUSG00000090165	K00699+K00699+K00699
Environmental Information Processing	Signal transduction	Hippo signaling pathway - multiple species	3	27	0.297109	0.861551	ko04392	ENSMUSG00000018849;ENSMUSG00000040021;ENSMUSG00000053110	K16685+K08791+K16687
Human Diseases	Cancers	Chronic myeloid leukemia	7	77	0.300626	0.861551	ko05220	ENSMUSG00000001127;ENSMUSG00000003031;ENSMUSG00000004221;ENSMUSG00000004936;ENSMUSG00000009681;ENSMUSG00000026842;ENSMUSG00000063065	K08845+K06624+K07210+K04368+K08878+K06619+K04371
Organismal Systems	Endocrine system	Glucagon signaling pathway	9	103	0.303117	0.861551	ko04922	ENSMUSG00000003865;ENSMUSG00000021820;ENSMUSG00000022521;ENSMUSG00000025127;ENSMUSG00000025271;ENSMUSG00000027513;ENSMUSG00000030244;ENSMUSG00000041798;ENSMUSG00000057897	K00693+K04515+K04498+K04583+K19028+K01596+K00693+K12407+K04515
Metabolism	Biosynthesis of other secondary metabolites	Neomycin, kanamycin and gentamicin biosynthesis	1	5	0.306767	0.861551	ko00524	ENSMUSG00000041798	K12407
Human Diseases	Cancers	Central carbon metabolism in cancer	6	65	0.30974	0.861551	ko05230	ENSMUSG00000004936;ENSMUSG00000030849;ENSMUSG00000031565;ENSMUSG00000041798;ENSMUSG00000063065;ENSMUSG00000091780	K04368+K05093+K04362+K12407+K04371+K07152
Organismal Systems	Excretory system	Aldosterone-regulated sodium reabsorption	4	40	0.312069	0.861551	ko04960	ENSMUSG00000024589;ENSMUSG00000031618;ENSMUSG00000055980;ENSMUSG00000063065	K13305+K08555+K16172+K04371
Metabolism	Lipid metabolism	Biosynthesis of unsaturated fatty acids	3	28	0.316958	0.861551	ko01040	ENSMUSG00000035376;ENSMUSG00000041220;ENSMUSG00000052392	K10703+K10203+K01068
Human Diseases	Endocrine and metabolic diseases	Maturity onset diabetes of the young	3	28	0.316958	0.861551	ko04950	ENSMUSG00000024986;ENSMUSG00000037025;ENSMUSG00000041798	K08024+K08035+K12407
Human Diseases	Infectious diseases	Herpes simplex infection	17	211	0.321335	0.865577	ko05168	ENSMUSG00000004221;ENSMUSG00000021116;ENSMUSG00000021134;ENSMUSG00000021546;ENSMUSG00000022521;ENSMUSG00000022965;ENSMUSG00000022967;ENSMUSG00000024164;ENSMUSG00000024387;ENSMUSG00000027164;ENSMUSG00000029238;ENSMUSG00000031386;ENSMUSG00000032012;ENSMUSG00000037321;ENSMUSG00000055116;ENSMUSG00000055866;ENSMUSG00000071172	K07210+K03237+K12893+K12886+K04498+K05133+K05130+K03990+K03115+K03175+K02223+K14966+K06081+K05653+K02296+K02633+K12892
Metabolism	Energy metabolism	Nitrogen metabolism	2	17	0.340313	0.908515	ko00910	ENSMUSG00000025991;ENSMUSG00000028463	K01948+K01672
Metabolism	Amino acid metabolism	Glycine, serine and threonine metabolism	4	42	0.344909	0.910524	ko00260	ENSMUSG00000002769;ENSMUSG00000024827;ENSMUSG00000029597;ENSMUSG00000032786	K00552+K00281+K17989+K00643
Metabolism	Amino acid metabolism	Valine, leucine and isoleucine degradation	5	55	0.347696	0.910524	ko00280	ENSMUSG00000027709;ENSMUSG00000028672;ENSMUSG00000032047;ENSMUSG00000036880;ENSMUSG00000041426	K01968+K01640+K00626+K07508+K05605
Environmental Information Processing	Signal transduction	HIF-1 signaling pathway	9	108	0.353433	0.910524	ko04066	ENSMUSG00000003031;ENSMUSG00000004936;ENSMUSG00000021820;ENSMUSG00000022521;ENSMUSG00000022965;ENSMUSG00000026773;ENSMUSG00000028156;ENSMUSG00000057897;ENSMUSG00000063065	K06624+K04368+K04515+K04498+K05133+K01103+K03259+K04515+K04371
Metabolism	Metabolism of other amino acids	Phosphonate and phosphinate metabolism	1	6	0.355768	0.910524	ko00440	ENSMUSG00000075703	K00993
Human Diseases	Drug resistance	Endocrine resistance	8	95	0.356292	0.910524	ko01522	ENSMUSG00000001127;ENSMUSG00000003031;ENSMUSG00000004936;ENSMUSG00000022607;ENSMUSG00000027048;ENSMUSG00000027276;ENSMUSG00000032185;ENSMUSG00000063065	K08845+K06624+K04368+K05725+K05664+K06052+K05931+K04371
Human Diseases	Cancers	Renal cell carcinoma	6	69	0.360917	0.914526	ko05211	ENSMUSG00000001127;ENSMUSG00000004936;ENSMUSG00000022521;ENSMUSG00000026526;ENSMUSG00000029999;ENSMUSG00000063065	K08845+K04368+K04498+K01679+K08774+K04371
Metabolism	Metabolism of other amino acids	Selenocompound metabolism	2	18	0.366617	0.91843	ko00450	ENSMUSG00000003477;ENSMUSG00000024899	K00562+K13811
Genetic Information Processing	Folding, sorting and degradation	RNA degradation	7	83	0.370654	0.91843	ko03018	ENSMUSG00000016018;ENSMUSG00000024359;ENSMUSG00000027714;ENSMUSG00000027770;ENSMUSG00000036478;ENSMUSG00000061559;ENSMUSG00000091625	K12598+K04043+K03678+K14442+K14443+K12602+K12624
Organismal Systems	Nervous system	Long-term potentiation	6	70	0.373816	0.91843	ko04720	ENSMUSG00000001127;ENSMUSG00000004936;ENSMUSG00000021820;ENSMUSG00000022521;ENSMUSG00000057897;ENSMUSG00000063065	K08845+K04368+K04515+K04498+K04515+K04371
Human Diseases	Infectious diseases	Legionellosis	5	57	0.376412	0.91843	ko05134	ENSMUSG00000015656;ENSMUSG00000024164;ENSMUSG00000078566;ENSMUSG00000079164;ENSMUSG00000090877	K03283+K03990+K15464+K10168+K03283
Genetic Information Processing	Translation	Aminoacyl-tRNA biosynthesis	4	44	0.377816	0.91843	ko00970	ENSMUSG00000001380;ENSMUSG00000026245;ENSMUSG00000026356;ENSMUSG00000026615	K01892+K01890+K22503+K14163
Organismal Systems	Endocrine system	Adipocytokine signaling pathway	6	71	0.386729	0.925055	ko04920	ENSMUSG00000003068;ENSMUSG00000004221;ENSMUSG00000027513;ENSMUSG00000031278;ENSMUSG00000038894;ENSMUSG00000055980	K07298+K07210+K01596+K01897+K07187+K16172
Human Diseases	Cancers	Acute myeloid leukemia	6	71	0.386729	0.925055	ko05221	ENSMUSG00000001127;ENSMUSG00000004221;ENSMUSG00000004936;ENSMUSG00000024014;ENSMUSG00000055866;ENSMUSG00000063065	K08845+K07210+K04368+K04702+K02633+K04371
Metabolism	Nucleotide metabolism	Purine metabolism	14	181	0.402132	0.953758	ko00230	ENSMUSG00000006678;ENSMUSG00000021018;ENSMUSG00000024899;ENSMUSG00000025630;ENSMUSG00000027823;ENSMUSG00000027889;ENSMUSG00000028186;ENSMUSG00000028469;ENSMUSG00000028525;ENSMUSG00000029246;ENSMUSG00000032478;ENSMUSG00000033020;ENSMUSG00000039197;ENSMUSG00000041119	K02320+K03016+K13811+K00760+K01951+K01490+K00365+K12324+K13293+K00764+K00940+K03014+K00856+K13761
Human Diseases	Cancers	Endometrial cancer	5	59	0.405108	0.953758	ko05213	ENSMUSG00000000303;ENSMUSG00000001127;ENSMUSG00000004936;ENSMUSG00000024182;ENSMUSG00000063065	K05689+K08845+K04368+K02157+K04371
Human Diseases	Cancers	Glioma	6	73	0.412536	0.956187	ko05214	ENSMUSG00000001127;ENSMUSG00000004936;ENSMUSG00000021820;ENSMUSG00000029999;ENSMUSG00000057897;ENSMUSG00000063065	K08845+K04368+K04515+K08774+K04515+K04371
Human Diseases	Cancers	Melanoma	6	73	0.412536	0.956187	ko05218	ENSMUSG00000000303;ENSMUSG00000001127;ENSMUSG00000004936;ENSMUSG00000031565;ENSMUSG00000035158;ENSMUSG00000063065	K05689+K08845+K04368+K04362+K09455+K04371
Environmental Information Processing	Signal transduction	VEGF signaling pathway	5	60	0.419401	0.964623	ko04370	ENSMUSG00000004936;ENSMUSG00000016528;ENSMUSG00000022607;ENSMUSG00000057342;ENSMUSG00000063065	K04368+K04443+K05725+K04718+K04371
Organismal Systems	Immune system	Fc gamma R-mediated phagocytosis	7	88	0.429754	0.973545	ko04666	ENSMUSG00000004936;ENSMUSG00000024381;ENSMUSG00000026879;ENSMUSG00000027695;ENSMUSG00000028868;ENSMUSG00000057342;ENSMUSG00000063065	K04368+K12562+K05768+K01115+K05748+K04718+K04371
Environmental Information Processing	Signal transduction	Hippo signaling pathway	12	157	0.431907	0.973545	ko04390	ENSMUSG00000000303;ENSMUSG00000003233;ENSMUSG00000018849;ENSMUSG00000020536;ENSMUSG00000020644;ENSMUSG00000020849;ENSMUSG00000021796;ENSMUSG00000024182;ENSMUSG00000036904;ENSMUSG00000040021;ENSMUSG00000041075;ENSMUSG00000053110	K05689+K02353+K16685+K06094+K17693+K06630+K04673+K02157+K02375+K08791+K02432+K16687
Environmental Information Processing	Signal transduction	Phosphatidylinositol signaling system	8	102	0.433048	0.973545	ko04070	ENSMUSG00000018547;ENSMUSG00000021987;ENSMUSG00000025178;ENSMUSG00000025477;ENSMUSG00000032594;ENSMUSG00000032599;ENSMUSG00000034354;ENSMUSG00000038861	K00920+K18083+K13711+K01106+K07756+K07756+K18082+K19801
Human Diseases	Cancers	Choline metabolism in cancer	8	103	0.44399	0.975523	ko05231	ENSMUSG00000004936;ENSMUSG00000022617;ENSMUSG00000023829;ENSMUSG00000027346;ENSMUSG00000027695;ENSMUSG00000028868;ENSMUSG00000040966;ENSMUSG00000063065	K04368+K14156+K08198+K18695+K01115+K05748+K08199+K04371
Human Diseases	Infectious diseases	Pertussis	6	76	0.451003	0.975523	ko05133	ENSMUSG00000024164;ENSMUSG00000027164;ENSMUSG00000032041;ENSMUSG00000032562;ENSMUSG00000036896;ENSMUSG00000063065	K03990+K03175+K05403+K04630+K03988+K04371
Human Diseases	Immune diseases	Primary immunodeficiency	3	35	0.453761	0.975523	ko05340	ENSMUSG00000004221;ENSMUSG00000005774;ENSMUSG00000037321	K07210+K08061+K05653
Human Diseases	Cardiovascular diseases	Fluid shear stress and atherosclerosis	11	146	0.457798	0.975523	ko05418	ENSMUSG00000001663;ENSMUSG00000001665;ENSMUSG00000004221;ENSMUSG00000021270;ENSMUSG00000021796;ENSMUSG00000022607;ENSMUSG00000024190;ENSMUSG00000025934;ENSMUSG00000060803;ENSMUSG00000065519;ENSMUSG00000068762	K00799+K00799+K07210+K04079+K04673+K05725+K21278+K00799+K00799+K16864+K00799
Environmental Information Processing	Signal transduction	mTOR signaling pathway	12	160	0.458358	0.975523	ko04150	ENSMUSG00000003068;ENSMUSG00000003233;ENSMUSG00000004936;ENSMUSG00000020593;ENSMUSG00000024913;ENSMUSG00000028156;ENSMUSG00000030842;ENSMUSG00000036904;ENSMUSG00000041075;ENSMUSG00000050552;ENSMUSG00000055980;ENSMUSG00000063065	K07298+K02353+K04368+K15728+K03068+K03259+K20397+K02375+K02432+K20399+K16172+K04371
Human Diseases	Endocrine and metabolic diseases	Type II diabetes mellitus	4	49	0.458917	0.975523	ko04930	ENSMUSG00000038894;ENSMUSG00000041798;ENSMUSG00000055980;ENSMUSG00000063065	K07187+K12407+K16172+K04371
Human Diseases	Cancers	Pancreatic cancer	6	77	0.463711	0.975523	ko05212	ENSMUSG00000001127;ENSMUSG00000004221;ENSMUSG00000004936;ENSMUSG00000027695;ENSMUSG00000029999;ENSMUSG00000063065	K08845+K07210+K04368+K01115+K08774+K04371
Metabolism	Metabolism of terpenoids and polyketides	Terpenoid backbone biosynthesis	2	22	0.466992	0.975523	ko00900	ENSMUSG00000032047;ENSMUSG00000039662	K00626+K00587
Cellular Processes	Cell motility	Regulation of actin cytoskeleton	16	217	0.467137	0.975523	ko04810	ENSMUSG00000001127;ENSMUSG00000001507;ENSMUSG00000004936;ENSMUSG00000005320;ENSMUSG00000018547;ENSMUSG00000020580;ENSMUSG00000020611;ENSMUSG00000022607;ENSMUSG00000022817;ENSMUSG00000026193;ENSMUSG00000026879;ENSMUSG00000028868;ENSMUSG00000030849;ENSMUSG00000031565;ENSMUSG00000036402;ENSMUSG00000063065	K08845+K06482+K04368+K05095+K00920+K17388+K04639+K05725+K06588+K05717+K05768+K05748+K05093+K04362+K04347+K04371
Metabolism	Metabolism of cofactors and vitamins	Nicotinate and nicotinamide metabolism	3	36	0.472502	0.975523	ko00760	ENSMUSG00000020572;ENSMUSG00000032271;ENSMUSG00000037847	K03462+K00541+K10524
Organismal Systems	Aging	Longevity regulating pathway - multiple species	5	64	0.47582	0.975523	ko04213	ENSMUSG00000015656;ENSMUSG00000037025;ENSMUSG00000038894;ENSMUSG00000055980;ENSMUSG00000090877	K03283+K08035+K07187+K16172+K03283
Human Diseases	Cancers	Basal cell carcinoma	5	64	0.47582	0.975523	ko05217	ENSMUSG00000003233;ENSMUSG00000024182;ENSMUSG00000036904;ENSMUSG00000041075;ENSMUSG00000064325	K02353+K02157+K02375+K02432+K06231
Human Diseases	Infectious diseases	Salmonella infection	6	78	0.476343	0.975523	ko05132	ENSMUSG00000016024;ENSMUSG00000020580;ENSMUSG00000022965;ENSMUSG00000028868;ENSMUSG00000063065;ENSMUSG00000079164	K05399+K17388+K05133+K05748+K04371+K10168
Metabolism	Energy metabolism	Sulfur metabolism	1	9	0.482978	0.978989	ko00920	ENSMUSG00000024899	K13811
Human Diseases	Infectious diseases	Hepatitis C	10	135	0.485967	0.978989	ko05160	ENSMUSG00000001127;ENSMUSG00000002108;ENSMUSG00000004221;ENSMUSG00000021116;ENSMUSG00000022512;ENSMUSG00000022967;ENSMUSG00000027164;ENSMUSG00000037936;ENSMUSG00000063065;ENSMUSG00000070473	K08845+K08536+K07210+K03237+K06087+K05130+K03175+K13885+K04371+K06087
Metabolism	Glycan biosynthesis and metabolism	Mannose type O-glycan biosyntheis	2	23	0.490601	0.978989	ko00515	ENSMUSG00000028538;ENSMUSG00000047379	K00781+K21032
Environmental Information Processing	Signal transduction	Wnt signaling pathway	11	150	0.494406	0.978989	ko04310	ENSMUSG00000003233;ENSMUSG00000020580;ENSMUSG00000021820;ENSMUSG00000022521;ENSMUSG00000022855;ENSMUSG00000024182;ENSMUSG00000024387;ENSMUSG00000024913;ENSMUSG00000036904;ENSMUSG00000041075;ENSMUSG00000057897	K02353+K17388+K04515+K04498+K03345+K02157+K03115+K03068+K02375+K02432+K04515
Human Diseases	Cancers	Breast cancer	11	150	0.494406	0.978989	ko05224	ENSMUSG00000001127;ENSMUSG00000003233;ENSMUSG00000004936;ENSMUSG00000020647;ENSMUSG00000024182;ENSMUSG00000024913;ENSMUSG00000027276;ENSMUSG00000031565;ENSMUSG00000036904;ENSMUSG00000041075;ENSMUSG00000063065	K08845+K02353+K04368+K09101+K02157+K03068+K06052+K04362+K02375+K02432+K04371
Organismal Systems	Endocrine system	Progesterone-mediated oocyte maturation	7	94	0.499603	0.979729	ko04914	ENSMUSG00000001127;ENSMUSG00000004936;ENSMUSG00000020300;ENSMUSG00000021270;ENSMUSG00000029003;ENSMUSG00000032562;ENSMUSG00000063065	K08845+K04368+K02602+K04079+K13728+K04630+K04371
Human Diseases	Drug resistance	Platinum drug resistance	6	80	0.501333	0.979729	ko01524	ENSMUSG00000001663;ENSMUSG00000001665;ENSMUSG00000025934;ENSMUSG00000060803;ENSMUSG00000063065;ENSMUSG00000068762	K00799+K00799+K00799+K00799+K04371+K00799
Human Diseases	Cancers	Gastric cancer	11	152	0.512497	0.995043	ko05226	ENSMUSG00000000303;ENSMUSG00000001127;ENSMUSG00000003031;ENSMUSG00000003233;ENSMUSG00000004936;ENSMUSG00000024182;ENSMUSG00000024913;ENSMUSG00000030849;ENSMUSG00000036904;ENSMUSG00000041075;ENSMUSG00000063065	K05689+K08845+K06624+K02353+K04368+K02157+K03068+K05093+K02375+K02432+K04371
Human Diseases	Infectious diseases	Epstein-Barr virus infection	15	210	0.521543	1	ko05169	ENSMUSG00000003031;ENSMUSG00000004221;ENSMUSG00000015656;ENSMUSG00000020290;ENSMUSG00000020708;ENSMUSG00000020849;ENSMUSG00000021018;ENSMUSG00000021737;ENSMUSG00000022521;ENSMUSG00000024387;ENSMUSG00000026914;ENSMUSG00000027164;ENSMUSG00000033020;ENSMUSG00000042541;ENSMUSG00000090877	K06624+K07210+K03283+K14290+K03066+K06630+K03016+K03037+K04498+K03115+K03030+K03175+K03014+K10881+K03283
Genetic Information Processing	Folding, sorting and degradation	Ubiquitin mediated proteolysis	10	140	0.533255	1	ko04120	ENSMUSG00000021774;ENSMUSG00000022771;ENSMUSG00000024589;ENSMUSG00000024807;ENSMUSG00000025423;ENSMUSG00000027164;ENSMUSG00000029577;ENSMUSG00000032030;ENSMUSG00000038664;ENSMUSG00000040782	K20217+K10598+K13305+K10601+K16063+K03175+K10588+K10612+K10594+K10143
Metabolism	Glycan biosynthesis and metabolism	Glycosylphosphatidylinositol(GPI)-anchor biosynthesis	2	25	0.535787	1	ko00563	ENSMUSG00000017721;ENSMUSG00000025728	K05292+K03860
Human Diseases	Infectious diseases	Influenza A	12	169	0.536369	1	ko05164	ENSMUSG00000004936;ENSMUSG00000015656;ENSMUSG00000018362;ENSMUSG00000020290;ENSMUSG00000020641;ENSMUSG00000021116;ENSMUSG00000022521;ENSMUSG00000022905;ENSMUSG00000022965;ENSMUSG00000022967;ENSMUSG00000063065;ENSMUSG00000090877	K04368+K03283+K15043+K14290+K15045+K03237+K04498+K15042+K05133+K05130+K04371+K03283
Human Diseases	Drug resistance	EGFR tyrosine kinase inhibitor resistance	6	83	0.53799	1	ko01521	ENSMUSG00000001127;ENSMUSG00000004936;ENSMUSG00000028156;ENSMUSG00000029999;ENSMUSG00000030849;ENSMUSG00000063065	K08845+K04368+K03259+K08774+K05093+K04371
Metabolism	Amino acid metabolism	Tyrosine metabolism	3	40	0.544253	1	ko00350	ENSMUSG00000000326;ENSMUSG00000001670;ENSMUSG00000025190	K00545+K00815+K14454
Organismal Systems	Environmental adaptation	Circadian entrainment	7	98	0.54463	1	ko04713	ENSMUSG00000021820;ENSMUSG00000030592;ENSMUSG00000032562;ENSMUSG00000036402;ENSMUSG00000055866;ENSMUSG00000057897;ENSMUSG00000063065	K04515+K04961+K04630+K04347+K02633+K04515+K04371
Metabolism	Metabolism of cofactors and vitamins	Folate biosynthesis	2	26	0.557325	1	ko00790	ENSMUSG00000020051;ENSMUSG00000021496	K00500+K01724
Organismal Systems	Endocrine system	Regulation of lipolysis in adipocyte	4	56	0.565418	1	ko04923	ENSMUSG00000003123;ENSMUSG00000032562;ENSMUSG00000038894;ENSMUSG00000055980	K07188+K04630+K07187+K16172
Metabolism	Glycan biosynthesis and metabolism	Glycosphingolipid biosynthesis - lacto and neolacto series	2	27	0.578142	1	ko00601	ENSMUSG00000028538;ENSMUSG00000051650	K00781+K00741
Metabolism	Carbohydrate metabolism	Butanoate metabolism	2	27	0.578142	1	ko00650	ENSMUSG00000028672;ENSMUSG00000032047	K01640+K00626
Metabolism	Metabolism of cofactors and vitamins	Ubiquinone and other terpenoid-quinone biosynthesis	1	12	0.585104	1	ko00130	ENSMUSG00000001670	K00815
Metabolism	Metabolism of other amino acids	Taurine and hypotaurine metabolism	1	12	0.585104	1	ko00430	ENSMUSG00000057134	K10712
Organismal Systems	Endocrine system	Aldosterone synthesis and secretion	7	102	0.587884	1	ko04925	ENSMUSG00000003123;ENSMUSG00000021820;ENSMUSG00000030302;ENSMUSG00000037936;ENSMUSG00000039145;ENSMUSG00000049115;ENSMUSG00000057897	K07188+K04515+K05850+K13885+K08794+K04166+K04515
Human Diseases	Infectious diseases	Chagas disease (American trypanosomiasis)	7	102	0.587884	1	ko05142	ENSMUSG00000004221;ENSMUSG00000022965;ENSMUSG00000024164;ENSMUSG00000027164;ENSMUSG00000032562;ENSMUSG00000036896;ENSMUSG00000063065	K07210+K05133+K03990+K03175+K04630+K03988+K04371
Organismal Systems	Development	Axon guidance	12	176	0.594372	1	ko04360	ENSMUSG00000019647;ENSMUSG00000020580;ENSMUSG00000021820;ENSMUSG00000022607;ENSMUSG00000026640;ENSMUSG00000026842;ENSMUSG00000028064;ENSMUSG00000030539;ENSMUSG00000032547;ENSMUSG00000032562;ENSMUSG00000057897;ENSMUSG00000063065	K06842+K17388+K04515+K05725+K06820+K06619+K06521+K06521+K05128+K04630+K04515+K04371
Organismal Systems	Immune system	Complement and coagulation cascades	6	88	0.596323	1	ko04610	ENSMUSG00000021492;ENSMUSG00000022875;ENSMUSG00000024164;ENSMUSG00000036896;ENSMUSG00000038224;ENSMUSG00000044206	K01328+K03898+K03990+K03988+K03983+K19822
Genetic Information Processing	Transcription	RNA polymerase	2	28	0.598233	1	ko03020	ENSMUSG00000021018;ENSMUSG00000033020	K03016+K03014
Organismal Systems	Excretory system	Collecting duct acid secretion	2	28	0.598233	1	ko04966	ENSMUSG00000001750;ENSMUSG00000017756	K02154+K13627
Organismal Systems	Digestive system	Pancreatic secretion	7	103	0.598376	1	ko04972	ENSMUSG00000004771;ENSMUSG00000009646;ENSMUSG00000019066;ENSMUSG00000030302;ENSMUSG00000030730;ENSMUSG00000060961;ENSMUSG00000096770	K07904+K01047+K07884+K05850+K05853+K13575+K01176
Cellular Processes	Cell growth and death	Oocyte meiosis	8	119	0.610313	1	ko04114	ENSMUSG00000004936;ENSMUSG00000020300;ENSMUSG00000020849;ENSMUSG00000021820;ENSMUSG00000024777;ENSMUSG00000029003;ENSMUSG00000057897;ENSMUSG00000063065	K04368+K02602+K06630+K04515+K11584+K13728+K04515+K04371
Organismal Systems	Endocrine system	Estrogen signaling pathway	9	134	0.612124	1	ko04915	ENSMUSG00000004936;ENSMUSG00000015656;ENSMUSG00000020647;ENSMUSG00000021270;ENSMUSG00000024222;ENSMUSG00000029999;ENSMUSG00000032562;ENSMUSG00000063065;ENSMUSG00000090877	K04368+K03283+K09101+K04079+K09571+K08774+K04630+K04371+K03283
Metabolism	Lipid metabolism	Arachidonic acid metabolism	6	90	0.618531	1	ko00590	ENSMUSG00000009646;ENSMUSG00000015889;ENSMUSG00000024055;ENSMUSG00000027983;ENSMUSG00000040660;ENSMUSG00000084346	K01047+K01254+K17726+K07422+K07412+K07425
Organismal Systems	Nervous system	Dopaminergic synapse	9	137	0.638825	1	ko04728	ENSMUSG00000000326;ENSMUSG00000006740;ENSMUSG00000021820;ENSMUSG00000024777;ENSMUSG00000029238;ENSMUSG00000032562;ENSMUSG00000036402;ENSMUSG00000055116;ENSMUSG00000057897	K00545+K10396+K04515+K11584+K02223+K04630+K04347+K02296+K04515
Human Diseases	Infectious diseases	Measles	9	137	0.638825	1	ko05162	ENSMUSG00000003031;ENSMUSG00000015656;ENSMUSG00000021116;ENSMUSG00000022965;ENSMUSG00000022967;ENSMUSG00000024387;ENSMUSG00000027164;ENSMUSG00000079316;ENSMUSG00000090877	K06624+K03283+K03237+K05133+K05130+K03115+K03175+K07899+K03283
Environmental Information Processing	Signal transduction	PI3K-Akt signaling pathway	24	359	0.643596	1	ko04151	ENSMUSG00000001507;ENSMUSG00000003031;ENSMUSG00000003068;ENSMUSG00000003865;ENSMUSG00000004221;ENSMUSG00000004936;ENSMUSG00000005320;ENSMUSG00000020849;ENSMUSG00000021270;ENSMUSG00000022607;ENSMUSG00000022817;ENSMUSG00000022967;ENSMUSG00000024777;ENSMUSG00000026193;ENSMUSG00000027513;ENSMUSG00000028156;ENSMUSG00000029304;ENSMUSG00000029999;ENSMUSG00000030244;ENSMUSG00000030849;ENSMUSG00000031565;…	K06482+K06624+K07298+K00693+K07210+K04368+K05095+K06630+K04079+K05725+K06588+K05130+K11584+K05717+K01596+K03259+K06250+K08774+K00693+K05093+K04362+K04347+K16172+K04371
Metabolism	Lipid metabolism	Glycerolipid metabolism	4	62	0.646793	1	ko00561	ENSMUSG00000020593;ENSMUSG00000024052;ENSMUSG00000026922;ENSMUSG00000031545	K15728+K15728+K13509+K13506
Metabolism	Carbohydrate metabolism	Propanoate metabolism	2	31	0.654153	1	ko00640	ENSMUSG00000032047;ENSMUSG00000041426	K00626+K05605
Human Diseases	Substance dependence	Morphine addiction	6	94	0.6608	1	ko05032	ENSMUSG00000018909;ENSMUSG00000028525;ENSMUSG00000032562;ENSMUSG00000036402;ENSMUSG00000052783;ENSMUSG00000074886	K04439+K13293+K04630+K04347+K08291+K08291
Cellular Processes	Cell growth and death	Cell cycle	8	125	0.665708	1	ko04110	ENSMUSG00000003031;ENSMUSG00000020849;ENSMUSG00000022521;ENSMUSG00000026761;ENSMUSG00000026842;ENSMUSG00000029003;ENSMUSG00000031016;ENSMUSG00000033102	K06624+K06630+K04498+K02606+K06619+K13728+K06632+K06639
Metabolism	Metabolism of cofactors and vitamins	Thiamine metabolism	1	15	0.667085	1	ko00730	ENSMUSG00000045691	K05307
Human Diseases	Infectious diseases	Toxoplasmosis	7	110	0.667728	1	ko05145	ENSMUSG00000004221;ENSMUSG00000015656;ENSMUSG00000022965;ENSMUSG00000027164;ENSMUSG00000032562;ENSMUSG00000063065;ENSMUSG00000090877	K07210+K03283+K05133+K03175+K04630+K04371+K03283
Metabolism	Lipid metabolism	Ether lipid metabolism	3	48	0.669111	1	ko00565	ENSMUSG00000009646;ENSMUSG00000027695;ENSMUSG00000075703	K01047+K01115+K00993
Human Diseases	Cancers	Small cell lung cancer	6	96	0.680805	1	ko05222	ENSMUSG00000001507;ENSMUSG00000003031;ENSMUSG00000004221;ENSMUSG00000022607;ENSMUSG00000026193;ENSMUSG00000027164	K06482+K06624+K07210+K05725+K05717+K03175
Organismal Systems	Endocrine system	Oxytocin signaling pathway	10	158	0.687312	1	ko04921	ENSMUSG00000004936;ENSMUSG00000020580;ENSMUSG00000021820;ENSMUSG00000028469;ENSMUSG00000030592;ENSMUSG00000032562;ENSMUSG00000039145;ENSMUSG00000057897;ENSMUSG00000063065;ENSMUSG00000090841	K04368+K17388+K04515+K12324+K04961+K04630+K08794+K04515+K04371+K12751
Metabolism	Carbohydrate metabolism	Galactose metabolism	2	33	0.687868	1	ko00052	ENSMUSG00000001891;ENSMUSG00000041798	K00963+K12407
Metabolism	Metabolism of other amino acids	beta-Alanine metabolism	2	33	0.687868	1	ko00410	ENSMUSG00000041426;ENSMUSG00000071708	K05605+K00802
Human Diseases	Infectious diseases	Leishmaniasis	4	66	0.695114	1	ko05140	ENSMUSG00000022965;ENSMUSG00000024164;ENSMUSG00000027164;ENSMUSG00000063065	K05133+K03990+K03175+K04371
Metabolism	Lipid metabolism	Linoleic acid metabolism	3	50	0.696101	1	ko00591	ENSMUSG00000009646;ENSMUSG00000029630;ENSMUSG00000032310	K01047+K07424+K07409
Organismal Systems	Circulatory system	Cardiac muscle contraction	5	82	0.696897	1	ko04260	ENSMUSG00000000088;ENSMUSG00000022551;ENSMUSG00000032366;ENSMUSG00000035885;ENSMUSG00000061518	K02264+K00413+K10373+K02273+K02265
Organismal Systems	Immune system	NOD-like receptor signaling pathway	11	175	0.700601	1	ko04621	ENSMUSG00000004221;ENSMUSG00000018567;ENSMUSG00000020572;ENSMUSG00000021270;ENSMUSG00000021771;ENSMUSG00000022024;ENSMUSG00000022789;ENSMUSG00000022967;ENSMUSG00000027164;ENSMUSG00000041135;ENSMUSG00000063065	K07210+K08341+K03462+K04079+K15040+K12795+K17065+K05130+K03175+K08846+K04371
Cellular Processes	Transport and catabolism	Autophagy - other eukaryotes	2	34	0.703688	1	ko04136	ENSMUSG00000018567;ENSMUSG00000033124	K08341+K17907
Organismal Systems	Nervous system	Glutamatergic synapse	7	114	0.703868	1	ko04724	ENSMUSG00000007617;ENSMUSG00000025813;ENSMUSG00000027695;ENSMUSG00000032562;ENSMUSG00000036402;ENSMUSG00000037541;ENSMUSG00000063065	K15010+K15010+K01115+K04630+K04347+K15009+K04371
Organismal Systems	Immune system	RIG-I-like receptor signaling pathway	4	68	0.717433	1	ko04622	ENSMUSG00000004221;ENSMUSG00000027164;ENSMUSG00000033107;ENSMUSG00000035692	K07210+K03175+K12170+K12159
Human Diseases	Cancers	Non-small cell lung cancer	4	68	0.717433	1	ko05223	ENSMUSG00000001127;ENSMUSG00000004936;ENSMUSG00000029999;ENSMUSG00000063065	K08845+K04368+K08774+K04371
Human Diseases	Cancers	Proteoglycans in cancer	13	208	0.717955	1	ko05205	ENSMUSG00000001127;ENSMUSG00000004936;ENSMUSG00000020580;ENSMUSG00000021820;ENSMUSG00000022607;ENSMUSG00000022817;ENSMUSG00000026193;ENSMUSG00000031565;ENSMUSG00000036904;ENSMUSG00000041075;ENSMUSG00000057897;ENSMUSG00000063065;ENSMUSG00000065519	K08845+K04368+K17388+K04515+K05725+K06588+K05717+K04362+K02375+K02432+K04515+K04371+K16864
Organismal Systems	Nervous system	Serotonergic synapse	8	132	0.724018	1	ko04726	ENSMUSG00000001127;ENSMUSG00000004936;ENSMUSG00000022445;ENSMUSG00000024190;ENSMUSG00000032562;ENSMUSG00000036402;ENSMUSG00000047155;ENSMUSG00000063065	K08845+K04368+K07414+K21278+K04630+K04347+K07428+K04371
Environmental Information Processing	Signal transduction	TGF-beta signaling pathway	5	85	0.726732	1	ko04350	ENSMUSG00000020644;ENSMUSG00000021796;ENSMUSG00000022521;ENSMUSG00000025405;ENSMUSG00000063065	K17693+K04673+K04498+K22688+K04371
Organismal Systems	Immune system	Antigen processing and presentation	5	85	0.726732	1	ko04612	ENSMUSG00000005774;ENSMUSG00000015656;ENSMUSG00000021270;ENSMUSG00000037321;ENSMUSG00000090877	K08061+K03283+K04079+K05653+K03283
Cellular Processes	Cell growth and death	Necroptosis	11	179	0.728295	1	ko04217	ENSMUSG00000021270;ENSMUSG00000021771;ENSMUSG00000021820;ENSMUSG00000022789;ENSMUSG00000022965;ENSMUSG00000022967;ENSMUSG00000024661;ENSMUSG00000027804;ENSMUSG00000029500;ENSMUSG00000053483;ENSMUSG00000057897	K04079+K15040+K04515+K17065+K05133+K05130+K00522+K05864+K15637+K21634+K04515
Organismal Systems	Endocrine system	Thyroid hormone signaling pathway	7	117	0.729214	1	ko04919	ENSMUSG00000004936;ENSMUSG00000013833;ENSMUSG00000019838;ENSMUSG00000020647;ENSMUSG00000022521;ENSMUSG00000063065;ENSMUSG00000079487	K04368+K15159+K08187+K09101+K04498+K04371+K15162
Cellular Processes	Cellular community - eukaryotes	Gap junction	5	87	0.745416	1	ko04540	ENSMUSG00000004936;ENSMUSG00000023004;ENSMUSG00000032562;ENSMUSG00000058672;ENSMUSG00000063065	K04368+K07374+K04630+K07375+K04371
Organismal Systems	Circulatory system	Adrenergic signaling in cardiomyocytes	9	151	0.748942	1	ko04261	ENSMUSG00000021820;ENSMUSG00000024777;ENSMUSG00000030302;ENSMUSG00000032366;ENSMUSG00000032562;ENSMUSG00000045875;ENSMUSG00000049115;ENSMUSG00000057897;ENSMUSG00000063065	K04515+K11584+K05850+K10373+K04630+K04135+K04166+K04515+K04371
Metabolism	Lipid metabolism	Steroid biosynthesis	1	19	0.751801	1	ko00100	ENSMUSG00000058454	K00213
Metabolism	Metabolism of cofactors and vitamins	One carbon pool by folate	1	19	0.751801	1	ko00670	ENSMUSG00000029009	K00297
Environmental Information Processing	Signal transduction	cAMP signaling pathway	12	200	0.763197	1	ko04024	ENSMUSG00000003123;ENSMUSG00000004936;ENSMUSG00000020580;ENSMUSG00000021820;ENSMUSG00000022521;ENSMUSG00000027695;ENSMUSG00000028525;ENSMUSG00000030302;ENSMUSG00000032562;ENSMUSG00000057897;ENSMUSG00000063065;ENSMUSG00000064325	K07188+K04368+K17388+K04515+K04498+K01115+K13293+K05850+K04630+K04515+K04371+K06231
Organismal Systems	Endocrine system	GnRH signaling pathway	5	90	0.771647	1	ko04912	ENSMUSG00000004936;ENSMUSG00000021820;ENSMUSG00000027695;ENSMUSG00000057897;ENSMUSG00000063065	K04368+K04515+K01115+K04515+K04371
Human Diseases	Cancers	Colorectal cancer	5	90	0.771647	1	ko05210	ENSMUSG00000001127;ENSMUSG00000004936;ENSMUSG00000024182;ENSMUSG00000029999;ENSMUSG00000063065	K08845+K04368+K02157+K08774+K04371
Metabolism	Glycan biosynthesis and metabolism	Glycosaminoglycan degradation	1	21	0.785706	1	ko00531	ENSMUSG00000037260	K10532
Human Diseases	Cardiovascular diseases	Arrhythmogenic right ventricular cardiomyopathy (ARVC)	4	75	0.786012	1	ko05412	ENSMUSG00000001507;ENSMUSG00000022817;ENSMUSG00000024331;ENSMUSG00000054889	K06482+K06588+K07601+K10381
Organismal Systems	Immune system	IL-17 signaling pathway	5	94	0.803349	1	ko04657	ENSMUSG00000002897;ENSMUSG00000004221;ENSMUSG00000021270;ENSMUSG00000027164;ENSMUSG00000063065	K05164+K07210+K04079+K03175+K04371
Genetic Information Processing	Replication and repair	Homologous recombination	2	42	0.807477	1	ko03440	ENSMUSG00000002814;ENSMUSG00000042541	K03165+K10881
Environmental Information Processing	Signal transduction	MAPK signaling pathway	18	302	0.808085	1	ko04010	ENSMUSG00000001127;ENSMUSG00000003099;ENSMUSG00000004221;ENSMUSG00000004936;ENSMUSG00000005320;ENSMUSG00000015605;ENSMUSG00000015656;ENSMUSG00000016528;ENSMUSG00000018909;ENSMUSG00000024190;ENSMUSG00000027164;ENSMUSG00000029999;ENSMUSG00000030849;ENSMUSG00000031565;ENSMUSG00000033618;ENSMUSG00000036402;ENSMUSG00000063065;ENSMUSG00000090877	K08845+K04460+K07210+K04368+K05095+K04378+K03283+K04443+K04439+K21278+K03175+K08774+K05093+K04362+K04422+K04347+K04371+K03283
Organismal Systems	Immune system	Chemokine signaling pathway	11	193	0.811625	1	ko04062	ENSMUSG00000004221;ENSMUSG00000004936;ENSMUSG00000018909;ENSMUSG00000020580;ENSMUSG00000022607;ENSMUSG00000031450;ENSMUSG00000032562;ENSMUSG00000036402;ENSMUSG00000052783;ENSMUSG00000063065;ENSMUSG00000074886	K07210+K04368+K04439+K17388+K05725+K00909+K04630+K04347+K08291+K04371+K08291
Metabolism	Glycan biosynthesis and metabolism	Other types of O-glycan biosynthesis	1	23	0.814986	1	ko00514	ENSMUSG00000028538	K00781
Organismal Systems	Immune system	Cytosolic DNA-sensing pathway	3	61	0.815286	1	ko04623	ENSMUSG00000004221;ENSMUSG00000021018;ENSMUSG00000033020	K07210+K03016+K03014
Organismal Systems	Development	Osteoclast differentiation	7	129	0.815364	1	ko04380	ENSMUSG00000004221;ENSMUSG00000004936;ENSMUSG00000022965;ENSMUSG00000022967;ENSMUSG00000027164;ENSMUSG00000035158;ENSMUSG00000063065	K07210+K04368+K05133+K05130+K03175+K09455+K04371
Genetic Information Processing	Transcription	Basal transcription factors	2	43	0.817882	1	ko03022	ENSMUSG00000033543;ENSMUSG00000067995	K03123+K03139
Human Diseases	Infectious diseases	Human papillomavirus infection	22	367	0.820975	1	ko05165	ENSMUSG00000001507;ENSMUSG00000001750;ENSMUSG00000003031;ENSMUSG00000003233;ENSMUSG00000004221;ENSMUSG00000004936;ENSMUSG00000020536;ENSMUSG00000022521;ENSMUSG00000022607;ENSMUSG00000022817;ENSMUSG00000022967;ENSMUSG00000024182;ENSMUSG00000024777;ENSMUSG00000026193;ENSMUSG00000027276;ENSMUSG00000028423;ENSMUSG00000029304;ENSMUSG00000034245;ENSMUSG00000035692;ENSMUSG00000036904;ENSMUSG00000041075;…	K06482+K02154+K06624+K02353+K07210+K04368+K06094+K04498+K05725+K06588+K05130+K02157+K11584+K05717+K06052+K12236+K06250+K11418+K12159+K02375+K02432+K04371
Organismal Systems	Nervous system	Cholinergic synapse	6	114	0.825426	1	ko04725	ENSMUSG00000004936;ENSMUSG00000021820;ENSMUSG00000032562;ENSMUSG00000036402;ENSMUSG00000057897;ENSMUSG00000063065	K04368+K04515+K04630+K04347+K04515+K04371
Environmental Information Processing	Signal transduction	Hedgehog signaling pathway	2	44	0.82778	1	ko04340	ENSMUSG00000018909;ENSMUSG00000064325	K04439+K06231
Environmental Information Processing	Signal transduction	Phospholipase D signaling pathway	8	148	0.830217	1	ko04072	ENSMUSG00000004936;ENSMUSG00000020123;ENSMUSG00000020611;ENSMUSG00000026922;ENSMUSG00000027695;ENSMUSG00000049115;ENSMUSG00000057342;ENSMUSG00000063065	K04368+K04226+K04639+K13509+K01115+K04166+K04718+K04371
Environmental Information Processing	Signal transduction	TNF signaling pathway	6	116	0.837682	1	ko04668	ENSMUSG00000004221;ENSMUSG00000004936;ENSMUSG00000022789;ENSMUSG00000027276;ENSMUSG00000029500;ENSMUSG00000063065	K07210+K04368+K17065+K06052+K15637+K04371
Metabolism	Amino acid metabolism	Histidine metabolism	1	25	0.840272	1	ko00340	ENSMUSG00000020774	K01437
Metabolism	Lipid metabolism	alpha-Linolenic acid metabolism	1	25	0.840272	1	ko00592	ENSMUSG00000009646	K01047
Environmental Information Processing	Signal transduction	Calcium signaling pathway	10	185	0.851169	1	ko04020	ENSMUSG00000020123;ENSMUSG00000021771;ENSMUSG00000021820;ENSMUSG00000030302;ENSMUSG00000030592;ENSMUSG00000030730;ENSMUSG00000045875;ENSMUSG00000049115;ENSMUSG00000057342;ENSMUSG00000057897	K04226+K15040+K04515+K05850+K04961+K05853+K04135+K04166+K04718+K04515
Environmental Information Processing	Signaling molecules and interaction	ECM-receptor interaction	4	84	0.853928	1	ko04512	ENSMUSG00000001507;ENSMUSG00000022817;ENSMUSG00000026193;ENSMUSG00000029304	K06482+K06588+K05717+K06250
Environmental Information Processing	Signal transduction	NF-kappa B signaling pathway	5	102	0.856233	1	ko04064	ENSMUSG00000004221;ENSMUSG00000016024;ENSMUSG00000024387;ENSMUSG00000027164;ENSMUSG00000032041	K07210+K05399+K03115+K03175+K05403
Human Diseases	Endocrine and metabolic diseases	AGE-RAGE signaling pathway in diabetic complications	5	102	0.856233	1	ko04933	ENSMUSG00000003031;ENSMUSG00000024014;ENSMUSG00000026193;ENSMUSG00000049115;ENSMUSG00000063065	K06624+K04702+K05717+K04166+K04371
Cellular Processes	Cell growth and death	Apoptosis	7	137	0.859883	1	ko04210	ENSMUSG00000004221;ENSMUSG00000004936;ENSMUSG00000020715;ENSMUSG00000021116;ENSMUSG00000023004;ENSMUSG00000030560;ENSMUSG00000063065	K07210+K04368+K08852+K03237+K07374+K01275+K04371
Metabolism	Carbohydrate metabolism	Glycolysis / Gluconeogenesis	3	68	0.868421	1	ko00010	ENSMUSG00000024896;ENSMUSG00000027513;ENSMUSG00000041798	K03103+K01596+K12407
Organismal Systems	Endocrine system	Cortisol synthesis and secretion	3	68	0.868421	1	ko04927	ENSMUSG00000037936;ENSMUSG00000039956;ENSMUSG00000049115	K13885+K22398+K04166
Cellular Processes	Transport and catabolism	Phagosome	9	173	0.87087	1	ko04145	ENSMUSG00000001750;ENSMUSG00000022817;ENSMUSG00000023004;ENSMUSG00000024164;ENSMUSG00000030082;ENSMUSG00000037321;ENSMUSG00000037936;ENSMUSG00000058672;ENSMUSG00000078974	K02154+K06588+K07374+K03990+K10956+K05653+K13885+K07375+K07342
Human Diseases	Cardiovascular diseases	Hypertrophic cardiomyopathy (HCM)	4	87	0.872083	1	ko05410	ENSMUSG00000001507;ENSMUSG00000022817;ENSMUSG00000032366;ENSMUSG00000051747	K06482+K06588+K10373+K12567
Organismal Systems	Immune system	Th1 and Th2 cell differentiation	4	88	0.877687	1	ko04658	ENSMUSG00000004221;ENSMUSG00000022965;ENSMUSG00000027276;ENSMUSG00000063065	K07210+K05133+K06052+K04371
Organismal Systems	Nervous system	GABAergic synapse	4	88	0.877687	1	ko04727	ENSMUSG00000018567;ENSMUSG00000030108;ENSMUSG00000032562;ENSMUSG00000036402	K08341+K05039+K04630+K04347
Organismal Systems	Sensory system	Phototransduction	1	29	0.880962	1	ko04744	ENSMUSG00000031450	K00909
Human Diseases	Cancers	Viral carcinogenesis	12	226	0.883633	1	ko05203	ENSMUSG00000003031;ENSMUSG00000004221;ENSMUSG00000015605;ENSMUSG00000016528;ENSMUSG00000020849;ENSMUSG00000021546;ENSMUSG00000022521;ENSMUSG00000024164;ENSMUSG00000026879;ENSMUSG00000033543;ENSMUSG00000034245;ENSMUSG00000063065	K06624+K07210+K04378+K04443+K06630+K12886+K04498+K03990+K05768+K03123+K11418+K04371
Cellular Processes	Cell growth and death	p53 signaling pathway	3	71	0.886735	1	ko04115	ENSMUSG00000026389;ENSMUSG00000040782;ENSMUSG00000062762	K10142+K10143+K10134
Organismal Systems	Immune system	B cell receptor signaling pathway	3	71	0.886735	1	ko04662	ENSMUSG00000004221;ENSMUSG00000004936;ENSMUSG00000063065	K07210+K04368+K04371
Genetic Information Processing	Replication and repair	Fanconi anemia pathway	2	52	0.891023	1	ko03460	ENSMUSG00000002814;ENSMUSG00000022545	K03165+K10848
Organismal Systems	Digestive system	Protein digestion and absorption	4	91	0.893241	1	ko04974	ENSMUSG00000004098;ENSMUSG00000019838;ENSMUSG00000026837;ENSMUSG00000028339	K19721+K08187+K19721+K08135
Human Diseases	Cardiovascular diseases	Dilated cardiomyopathy (DCM)	4	91	0.893241	1	ko05414	ENSMUSG00000001507;ENSMUSG00000022817;ENSMUSG00000032366;ENSMUSG00000051747	K06482+K06588+K10373+K12567
Metabolism	Amino acid metabolism	Arginine and proline metabolism	2	53	0.897203	1	ko00330	ENSMUSG00000025190;ENSMUSG00000071708	K14454+K00802
Organismal Systems	Endocrine system	Prolactin signaling pathway	3	73	0.897646	1	ko04917	ENSMUSG00000004936;ENSMUSG00000041798;ENSMUSG00000063065	K04368+K12407+K04371
Organismal Systems	Aging	Longevity regulating pathway - mammal	4	92	0.898027	1	ko04211	ENSMUSG00000003068;ENSMUSG00000028156;ENSMUSG00000038894;ENSMUSG00000055980	K07298+K03259+K07187+K16172
Human Diseases	Infectious diseases	Hepatitis B	7	146	0.899095	1	ko05161	ENSMUSG00000003031;ENSMUSG00000004221;ENSMUSG00000004936;ENSMUSG00000022521;ENSMUSG00000022967;ENSMUSG00000032041;ENSMUSG00000063065	K06624+K07210+K04368+K04498+K05130+K05403+K04371
Cellular Processes	Cell growth and death	Cellular senescence	9	182	0.904467	1	ko04218	ENSMUSG00000004936;ENSMUSG00000016528;ENSMUSG00000021127;ENSMUSG00000021771;ENSMUSG00000027804;ENSMUSG00000045817;ENSMUSG00000061436;ENSMUSG00000063065;ENSMUSG00000085793	K04368+K04443+K18753+K15040+K05864+K18753+K08826+K04371+K21775
Cellular Processes	Cell growth and death	Apoptosis - multiple species	1	32	0.904529	1	ko04215	ENSMUSG00000026278	K02561
Organismal Systems	Digestive system	Gastric acid secretion	3	75	0.907603	1	ko04971	ENSMUSG00000021820;ENSMUSG00000032562;ENSMUSG00000057897	K04515+K04630+K04515
Organismal Systems	Excretory system	Endocrine and other factor-regulated calcium reabsorption	2	55	0.908598	1	ko04961	ENSMUSG00000004771;ENSMUSG00000028478	K07904+K04644
Human Diseases	Infectious diseases	Staphylococcus aureus infection	2	55	0.908598	1	ko05150	ENSMUSG00000024164;ENSMUSG00000036896	K03990+K03988
Organismal Systems	Endocrine system	Renin-angiotensin system	1	35	0.923437	1	ko04614	ENSMUSG00000049115	K04166
Organismal Systems	Immune system	Leukocyte transendothelial migration	5	117	0.92364	1	ko04670	ENSMUSG00000020580;ENSMUSG00000022512;ENSMUSG00000022607;ENSMUSG00000032562;ENSMUSG00000070473	K17388+K06087+K05725+K04630+K06087
Organismal Systems	Digestive system	Salivary secretion	3	79	0.924929	1	ko04970	ENSMUSG00000030302;ENSMUSG00000045875;ENSMUSG00000047517	K05850+K04135+K13912
Genetic Information Processing	Replication and repair	DNA replication	1	36	0.928868	1	ko03030	ENSMUSG00000006678	K02320
Human Diseases	Immune diseases	Inflammatiory bowel disease (IBD)	2	60	0.932121	1	ko05321	ENSMUSG00000022965;ENSMUSG00000079164	K05133+K10168
Organismal Systems	Immune system	Th17 cell differentiation	4	103	0.939404	1	ko04659	ENSMUSG00000004221;ENSMUSG00000021270;ENSMUSG00000022965;ENSMUSG00000063065	K07210+K04079+K05133+K04371
Environmental Information Processing	Signal transduction	Ras signaling pathway	11	235	0.949642	1	ko04014	ENSMUSG00000004221;ENSMUSG00000004936;ENSMUSG00000005320;ENSMUSG00000009646;ENSMUSG00000026842;ENSMUSG00000027695;ENSMUSG00000029999;ENSMUSG00000030849;ENSMUSG00000031565;ENSMUSG00000036402;ENSMUSG00000063065	K07210+K04368+K05095+K01047+K06619+K01115+K08774+K05093+K04362+K04347+K04371
Organismal Systems	Nervous system	Synaptic vesicle cycle	2	65	0.949837	1	ko04721	ENSMUSG00000001750;ENSMUSG00000028478	K02154+K04644
Organismal Systems	Endocrine system	Insulin secretion	3	88	0.953567	1	ko04911	ENSMUSG00000021820;ENSMUSG00000041798;ENSMUSG00000057897	K04515+K12407+K04515
Organismal Systems	Immune system	Fc epsilon RI signaling pathway	2	67	0.955608	1	ko04664	ENSMUSG00000004936;ENSMUSG00000063065	K04368+K04371
Organismal Systems	Immune system	Intestinal immune network for IgA production	1	43	0.957515	1	ko04672	ENSMUSG00000026417	K13073
Organismal Systems	Excretory system	Vasopressin-regulated water reabsorption	1	43	0.957515	1	ko04962	ENSMUSG00000004771	K07904
Genetic Information Processing	Replication and repair	Nucleotide excision repair	1	44	0.960532	1	ko03420	ENSMUSG00000022545	K10848
Organismal Systems	Digestive system	Carbohydrate digestion and absorption	1	44	0.960532	1	ko04973	ENSMUSG00000096770	K01176
Organismal Systems	Endocrine system	Relaxin signaling pathway	5	132	0.961427	1	ko04926	ENSMUSG00000004936;ENSMUSG00000018909;ENSMUSG00000032562;ENSMUSG00000036402;ENSMUSG00000063065	K04368+K04439+K04630+K04347+K04371
Human Diseases	Substance dependence	Amphetamine addiction	2	70	0.96309	1	ko05031	ENSMUSG00000021820;ENSMUSG00000057897	K04515+K04515
Human Diseases	Infectious diseases	Kaposi sarcoma-associated herpesvirus infection	9	208	0.963184	1	ko05167	ENSMUSG00000004221;ENSMUSG00000004936;ENSMUSG00000016528;ENSMUSG00000018567;ENSMUSG00000022521;ENSMUSG00000022967;ENSMUSG00000024164;ENSMUSG00000036402;ENSMUSG00000063065	K07210+K04368+K04443+K08341+K04498+K05130+K03990+K04347+K04371
Organismal Systems	Endocrine system	Renin secretion	2	71	0.965303	1	ko04924	ENSMUSG00000032562;ENSMUSG00000049115	K04630+K04166
Human Diseases	Substance dependence	Cocaine addiction	1	48	0.970607	1	ko05030	ENSMUSG00000032562	K04630
Organismal Systems	Immune system	Natural killer cell mediated cytotoxicity	5	139	0.972363	1	ko04650	ENSMUSG00000001127;ENSMUSG00000004936;ENSMUSG00000022965;ENSMUSG00000022967;ENSMUSG00000063065	K08845+K04368+K05133+K05130+K04371
Human Diseases	Substance dependence	Alcoholism	8	198	0.973766	1	ko05034	ENSMUSG00000001127;ENSMUSG00000004936;ENSMUSG00000023942;ENSMUSG00000027018;ENSMUSG00000032562;ENSMUSG00000034245;ENSMUSG00000036402;ENSMUSG00000063065	K08845+K04368+K15014+K11303+K04630+K11418+K04347+K04371
Cellular Processes	Cellular community - eukaryotes	Focal adhesion	8	203	0.978748	1	ko04510	ENSMUSG00000001507;ENSMUSG00000004936;ENSMUSG00000020580;ENSMUSG00000022607;ENSMUSG00000022817;ENSMUSG00000026193;ENSMUSG00000029304;ENSMUSG00000063065	K06482+K04368+K17388+K05725+K06588+K05717+K06250+K04371
Human Diseases	Cancers	Transcriptional misregulation in cancers	7	184	0.978841	1	ko05202	ENSMUSG00000003031;ENSMUSG00000020644;ENSMUSG00000022607;ENSMUSG00000024986;ENSMUSG00000026435;ENSMUSG00000035158;ENSMUSG00000055866	K06624+K17693+K05725+K08024+K15379+K09455+K02633
Human Diseases	Cardiovascular diseases	Viral myocarditis	2	80	0.980238	1	ko05416	ENSMUSG00000022865;ENSMUSG00000026842	K06788+K06619
Organismal Systems	Immune system	T cell receptor signaling pathway	3	104	0.980969	1	ko04660	ENSMUSG00000004221;ENSMUSG00000004936;ENSMUSG00000063065	K07210+K04368+K04371
Organismal Systems	Immune system	Platelet activation	4	127	0.982128	1	ko04611	ENSMUSG00000020580;ENSMUSG00000020611;ENSMUSG00000032562;ENSMUSG00000063065	K17388+K04639+K04630+K04371
Human Diseases	Infectious diseases	Amoebiasis	3	107	0.983974	1	ko05146	ENSMUSG00000022607;ENSMUSG00000026193;ENSMUSG00000045827	K05725+K05717+K13963
Organismal Systems	Endocrine system	Ovarian Steroidogenesis	1	57	0.984865	1	ko04913	ENSMUSG00000037936	K13885
Human Diseases	Infectious diseases	Human cytomegalovirus infection	10	251	0.986197	1	ko05163	ENSMUSG00000004221;ENSMUSG00000004936;ENSMUSG00000020580;ENSMUSG00000020611;ENSMUSG00000022607;ENSMUSG00000032562;ENSMUSG00000036402;ENSMUSG00000037321;ENSMUSG00000041977;ENSMUSG00000063065	K07210+K04368+K17388+K04639+K05725+K04630+K04347+K05653+K12331+K04371
Environmental Information Processing	Signal transduction	Rap1 signaling pathway	8	213	0.986205	1	ko04015	ENSMUSG00000000303;ENSMUSG00000004936;ENSMUSG00000005320;ENSMUSG00000030849;ENSMUSG00000031565;ENSMUSG00000032562;ENSMUSG00000042700;ENSMUSG00000063065	K05689+K04368+K05095+K05093+K04362+K04630+K17701+K04371
Organismal Systems	Immune system	C-type lectin receptor signaling pathway	3	114	0.989321	1	ko04625	ENSMUSG00000004221;ENSMUSG00000016528;ENSMUSG00000063065	K07210+K04443+K04371
Environmental Information Processing	Signaling molecules and interaction	Cell adhesion molecules (CAMs)	5	163	0.991699	1	ko04514	ENSMUSG00000000303;ENSMUSG00000022512;ENSMUSG00000032012;ENSMUSG00000033295;ENSMUSG00000070473	K05689+K06087+K06081+K05695+K06087
Human Diseases	Immune diseases	Systemic lupus erythematosus	4	142	0.992054	1	ko05322	ENSMUSG00000002477;ENSMUSG00000024164;ENSMUSG00000030966;ENSMUSG00000036896	K11087+K03990+K10651+K03988
Genetic Information Processing	Translation	mRNA surveillance pathway	2	96	0.992908	1	ko03015	ENSMUSG00000024777;ENSMUSG00000029038	K11584+K15544
Environmental Information Processing	Signal transduction	Jak-STAT signaling pathway	5	167	0.993261	1	ko04630	ENSMUSG00000022521;ENSMUSG00000022965;ENSMUSG00000022967;ENSMUSG00000024014;ENSMUSG00000025423	K04498+K05133+K05130+K04702+K16063
Organismal Systems	Sensory system	Inflammatory mediator regulation of TRP channels	3	128	0.995345	1	ko04750	ENSMUSG00000021820;ENSMUSG00000057897;ENSMUSG00000084346	K04515+K04515+K07425
Organismal Systems	Endocrine system	Thyroid hormone synthesis	1	74	0.995689	1	ko04918	ENSMUSG00000025823	K09582
Human Diseases	Immune diseases	Rheumatoid arthritis	1	85	0.99809	1	ko05323	ENSMUSG00000001750	K02154
Human Diseases	Infectious diseases	HTLV-I infection	9	280	0.998414	1	ko05166	ENSMUSG00000003233;ENSMUSG00000004221;ENSMUSG00000015605;ENSMUSG00000020290;ENSMUSG00000021771;ENSMUSG00000022521;ENSMUSG00000030527;ENSMUSG00000036904;ENSMUSG00000041075	K02353+K07210+K04378+K14290+K15040+K04498+K16334+K02375+K02432
Organismal Systems	Immune system	Hematopoietic cell lineage	1	94	0.999019	1	ko04640	ENSMUSG00000001507	K06482
Environmental Information Processing	Signaling molecules and interaction	Neuroactive ligand-receptor interaction	6	289	0.999973	1	ko04080	ENSMUSG00000020123;ENSMUSG00000022041;ENSMUSG00000025127;ENSMUSG00000045875;ENSMUSG00000049115;ENSMUSG00000058620	K04226+K04804+K04583+K04135+K04166+K04139
Environmental Information Processing	Signaling molecules and interaction	Cytokine-cytokine receptor interaction	5	297	0.999997	1	ko04060	ENSMUSG00000002897;ENSMUSG00000021796;ENSMUSG00000022965;ENSMUSG00000022967;ENSMUSG00000025405	K05164+K04673+K05133+K05130+K22688
Organismal Systems	Sensory system	Olfactory transduction	3	1114	1	1	ko04740	ENSMUSG00000018909;ENSMUSG00000021820;ENSMUSG00000057897	K04439+K04515+K04515
