# Supplementary material for: Translatomics Probes Into the Role of Lycopene on Improving Hepatic Steatosis Induced by High-Fat Diet
Source: Front Nutr. 2021 Nov 2;8:727785. doi: 10.3389/fnut.2021.727785 (PMC8594419; doi:10.3389/fnut.2021.727785)
Supplement: Supplementary Table 6 — The gene information in different quadrants. [file Table_6.XLSX]

## Sheet: A(15)
gene_name	log2FC_Ribo-seq	log2FC_RNA-seq
H2afz	1.02105	-1.17858
Ndufa4	1.06473	-1.68314
Wfdc21	1.09307	-2.00555
Mpc2	1.09604	-1.68533
2021-09-07	1.1312	-1.07361
Zbed5	1.21063	-1.57328
Prdx1	1.21785	-1.81274
Cox5a	1.28264	-1.98465
Tbca	1.32895	-1.76361
Vsig4	1.47941	-2.03441
Cbr4	1.49777	-1.5706
Pomp	1.51639	-1.41276
Mrps18c	1.88395	-1.62384
Polr2k	1.93712	-1.33888
Rps4x	1.94977	-1.32659

## Sheet: B(355)
gene_name	log2FC_Ribo-seq	log2FC_RNA-seq
Arl4c	2.24491	-2.02039
Mdh1	1.56168	-1.38616
B230118H07Rik	2.27557	-1.36983
Phpt1	1.61072	-1.33248
Wdr61	1.77592	-1.33038
Mrpl13	1.73106	-1.32009
Acaa2	1.24853	-1.2912
Btf3	1.54516	-1.29084
Ms4a4d	2.29248	-1.28577
Cetn3	1.72185	-1.24301
Mrps14	1.32191	-1.23808
Fabp2	1.11026	-1.2346
Dpm1	1.51449	-1.16349
Psma6	1.25658	-1.15578
Nop10	1.36789	-1.15379
Sult1b1	1.55205	-1.14733
Hint1	1.1187	-1.14173
Mrpl17	1.11788	-1.13188
Anxa5	1.02811	-1.12505
Psmb9	1.83622	-1.12161
Dmac1	2.25416	-1.11212
Hprt	1.19514	-1.11006
Tufm	1.02414	-1.10234
Eif2s2	1.61907	-1.09215
Fth1	1.31423	-1.09128
Ugp2	1.16913	-1.08848
Ndufs4	1.2063	-1.08418
Ndufaf1	1.14893	-1.08398
Sugct	1.07497	-1.07871
Ssu72	1.35838	-1.07481
Fdx1	1.42601	-1.07434
Vps35	1.05319	-1.06122
Psmd14	1.43056	-1.03128
Mat2a	1.09794	-1.03016
Ndufa7	1.05374	-1.02397
Ndufb2	2.37232	-1.0196
Exosc9	1.84907	-0.988373
Atp5c1	1.12451	-0.9755
Sfr1	1.54281	-0.973151
Copg2	1.2761	-0.971983
Akr1c14	1.06446	-0.951197
Glrx3	1.4288	-0.949788
0610031O16Rik	1.99318	-0.944863
Rbbp7	1.40051	-0.942887
Ndufa1	1.48897	-0.935869
Ndufb3	1.88868	-0.931645
Tfg	1.13036	-0.92168
Susd1	2.07987	-0.913859
Acat1	1.24204	-0.912839
Snrpe	1.50596	-0.905141
Ndufab1	1.29518	-0.902268
Ube2e1	1.19009	-0.879785
Ss18l2	1.46502	-0.873808
Aadat	1.0019	-0.872674
Vapa	1.4006	-0.866082
Cct4	1.36583	-0.862203
Isg15	2.09725	-0.854387
Ostf1	1.16337	-0.846893
Mup9	3.70147	-0.844734
Decr1	1.3552	-0.836632
Mup2	2.44761	-0.832694
Rnf115	1.2267	-0.831267
Bbox1	1.36829	-0.81972
Npm1	1.13396	-0.811367
Ola1	1.42954	-0.80803
Cwc15	2.2184	-0.80606
Grsf1	1.01542	-0.804124
Rps8	4.36016	-0.801741
Zfp706	1.79361	-0.79712
Atp5e	1.53304	-0.79588
Hao1	1.21536	-0.791475
Denr	1.68043	-0.789664
Hibch	1.40697	-0.786243
Sem1	1.49329	-0.774789
Eci1	1.18029	-0.772145
Hmgcl	1.05839	-0.754884
Atp5o	1.34716	-0.749714
Copb2	1.1214	-0.745007
Hspa9	1.15308	-0.741203
Cct6a	1.03133	-0.732132
2210016F16Rik	1.3074	-0.725273
Dars	1.60971	-0.715351
2410006H16Rik	2.30607	-0.711662
Txndc9	1.22826	-0.703655
Pex13	4.77432	-0.692487
Yme1l1	1.0224	-0.661264
Sugt1	1.54732	-0.659277
Tdo2	1.71702	-0.658129
Eny2	1.52894	-0.650642
Ndufb10	1.79609	-0.642976
Gabarap	1.0135	-0.641493
Rab11a	1.01474	-0.640447
Eif4e	1.48558	-0.636392
Sord	1.1374	-0.635491
Gbe1	1.06807	-0.634372
Sult2a8	1.56006	-0.631279
Eif2s1	1.08222	-0.625951
Ndufa10	1.40569	-0.625838
Twistnb	1.77873	-0.615713
Orm1	1.06257	-0.609141
Keg1	1.24207	-0.601449
Myl6	1.2041	-0.5937
Anks4b	1.10049	-0.592118
Acsl4	1.22683	-0.581678
Lsm5	2.14009	-0.581274
Pmpcb	1.47899	-0.578615
Sdf2	1.4666	-0.576088
Luc7l3	1.66457	-0.574461
Hsd17b4	1.07941	-0.567396
Khdrbs1	1.20096	-0.5513
Cops2	1.11937	-0.542755
Psmd6	1.13394	-0.541222
Timm17a	1.44224	-0.54101
Dnajc2	1.51167	-0.535455
Hnrnpa2b1	1.19791	-0.534537
Trmt10c	1.36231	-0.530057
Eef1e1	1.72002	-0.523918
Dnajc28	1.68645	-0.523575
Borcs8	1.47772	-0.51578
Rpl36al	1.2511	-0.513927
Atp5k	1.17151	-0.512812
Hnrnpk	1.00278	-0.511349
Adk	1.23441	-0.50589
S100a1	1.67106	-0.504809
Pfdn1	2.4565	-0.501895
Hars	1.50096	-0.491427
Rida	1.47746	-0.482427
Rexo2	1.00353	-0.480673
Plaa	1.10629	-0.47548
Mccc1	1.38261	-0.468732
Hat1	2.9169	-0.465545
Gm2083	2.09736	-0.460514
Coa6	1.83357	-0.457139
Drg1	1.17971	-0.451258
Clybl	1.09654	-0.443423
Atp5md	1.63416	-0.436905
Idh1	1.14155	-0.435285
Mrps31	1.53584	-0.427324
Rab9	1.5325	-0.42583
Sdhb	1.54517	-0.420865
Sec61g	1.04136	-0.411661
Fbxl5	1.67648	-0.410735
Cdkn1b	1.53004	-0.406658
Csde1	1.22573	-0.405335
Gstp3	1.76627	-0.405322
Zmat2	1.30246	-0.402153
Cct8	1.03554	-0.389895
Ndufb4c	1.71518	-0.38824
Pgam5	1.70939	-0.382863
Srsf3	1.40883	-0.382259
Acadl	1.02383	-0.381597
Farsb	1.05672	-0.381141
Rbis	2.37353	-0.380343
Rps28	1.14424	-0.376895
Phyh	1.38029	-0.369089
Sdcbp	1.52414	-0.366737
Gsta3	1.00038	-0.352731
Uox	1.2445	-0.34754
Snx4	1.20758	-0.341712
Kpna2	1.94095	-0.327846
Snrpd1	1.37384	-0.323994
Trappc1	1.84213	-0.318481
Lta4h	1.45259	-0.316265
Mtrex	1.56333	-0.30719
Pdcd5	1.35966	-0.299004
Ncoa4	1.00419	-0.293739
Stxbp3	1.72872	-0.28313
Guf1	1.7629	-0.281551
Cox20	1.62507	-0.2777
Hsp90aa1	1.81756	-0.277477
Thoc7	1.36784	-0.27345
Atp5j	2.27569	-0.273146
Ddx1	1.04352	-0.271216
Tefm	1.77665	-0.261353
Zfp260	2.50151	-0.26095
Lamtor4	1.20281	-0.255223
Uqcc3	1.51111	-0.251572
Ddx3y	1.28369	-0.250808
Vdac2	1.70519	-0.247535
Otc	1.19886	-0.246473
Osbpl1a	1.09743	-0.243505
Snx5	1.42184	-0.228944
Cox5b	1.81683	-0.22337
Cyb5a	1.91287	-0.220249
Ubxn2a	1.07165	-0.201733
Ipo7	1.52648	-0.197523
Spc24	2.63512	-0.193553
Srp54b	1.37423	-0.186172
Ywhae	1.27205	-0.181561
Ddx19b	1.09254	-0.180532
Eif3d	1.00411	-0.179818
Psmc5	1.00613	-0.176585
Arid4a	1.65278	-0.163611
Atl2	1.27279	-0.149194
Gnmt	1.02561	-0.147724
Cul5	1.06518	-0.143807
Rpl35	1.36694	-0.135225
Dnajb4	1.73982	-0.129873
1700021F05Rik	2.70827	-0.126725
Dnaja2	1.1721	-0.124173
Kbtbd2	1.52222	-0.11766
4833439L19Rik	2.41476	-0.115294
Mrto4	1.84216	-0.114713
Glyat	1.48175	-0.114257
Prpf40a	1.15516	-0.110277
Dnm1l	1.47083	-0.10736
Rabggtb	3.03749	-0.107007
Papss2	1.16463	-0.101258
Kng1	2.67352	-0.0931435
Dnaja1	2.02899	-0.0902298
Ddx20	1.86827	-0.0877435
Eif3j2	1.03987	-0.0849542
Ncl	1.04797	-0.0822953
Timm10b	1.6435	-0.0697221
Csnk2b	1.19343	-0.0524892
Gimap9	2.47004	-0.05093
Gtf2f2	2.29363	-0.0356937
Ndufa3	1.30793	-0.030763
Ndufa5	1.11815	-0.025825
Krtcap2	1.34877	-0.0200214
Arf5	1.32337	-0.0169633
Sec23a	1.15946	-0.0167637
Lin52	1.70518	-0.012746
Isy1	2.33472	-0.00615855
Dhx36	1.28152	-0.00439791
Gstt1	1.00942	0.00651672
Eftud2	1.49828	0.00762568
Inmt	1.09168	0.00894408
Rbm39	1.39937	0.0245936
Homer2	1.17143	0.0284995
Wdr12	1.68368	0.0315279
Ndufa12	1.32111	0.0464483
Polr2f	1.89644	0.0565359
Med6	2.52962	0.0569771
Odf2l	2.75001	0.0606229
Tpp2	1.35439	0.070785
Gdi1	1.41291	0.0726258
Kif5b	1.00902	0.0777708
Megf8	1.44427	0.0784368
Eif4a1	1.36986	0.0788122
Anp32b	1.10438	0.0885473
1810058I24Rik	1.21465	0.0893
1110038B12Rik	2.26946	0.0971744
Mrpl39	1.43335	0.1061
Spata5	1.65858	0.115506
Pah	1.22822	0.121666
Zfp445	1.10931	0.123006
Gkap1	1.86041	0.138914
Mad2l1bp	1.86408	0.145884
Ddx47	1.28547	0.151795
Rhot1	1.88118	0.157176
Rpl38	1.47303	0.159708
Dis3l2	1.88348	0.183292
Recql	2.06145	0.184639
S100a13	2.72177	0.214893
Tbc1d15	1.41081	0.219235
Arid4b	1.30565	0.227905
Gstp1	1.18553	0.228214
Usp8	1.28654	0.231546
Ap3m1	1.28596	0.244383
Orc4	1.68379	0.249454
Gtpbp4	1.57398	0.260723
Gmps	1.62586	0.263586
Serpina3m	1.09505	0.264323
As3mt	1.02551	0.268209
Gnl2	1.25704	0.268267
Eif3b	1.15695	0.271807
Rnf19b	3.13027	0.27977
Map2k1	1.16565	0.286131
Cps1	1.01787	0.288463
Xpo1	1.31101	0.316195
Ppid	1.86895	0.318112
Dancr	3.12313	0.319132
Chordc1	1.80601	0.321211
Lrpprc	1.27123	0.339329
Ppil2	1.22017	0.343842
Dcaf13	2.17169	0.350379
Sf3a3	1.56132	0.353795
Fh1	1.49541	0.36569
Esf1	1.71109	0.368469
Top1	1.37827	0.386557
Acot4	1.30864	0.388564
Nat8f5	1.59758	0.418164
Ppat	2.46807	0.442717
Aspa	2.03222	0.469659
Hspa8	1.82894	0.481702
Idh3g	1.16457	0.484518
Ubap2l	1.204	0.489138
Mrpl24	1.27718	0.506681
Prmt9	1.59343	0.509866
Bod1l	1.46381	0.523669
Stip1	1.14074	0.530196
Eif2b3	1.93211	0.530592
Epb41l2	1.35812	0.532697
Bnip3	1.25339	0.538237
Hspa1b	3.06372	0.55537
Eif3g	1.50972	0.565776
Phf8	1.505	0.569825
Edrf1	1.30931	0.571016
Tbce	1.93979	0.590268
Ecm2	1.87473	0.60002
Ahsa2	2.13144	0.601146
Trip11	1.01371	0.604093
Cobll1	1.38433	0.605882
Txlng	2.29074	0.611709
Thoc5	1.43162	0.611922
Hspa4l	1.3856	0.630321
Eci2	1.458	0.635347
Ubc	1.55596	0.641564
Slc25a32	1.23945	0.651466
Rbm26	1.23677	0.653436
Sult1d1	1.47645	0.65905
Sms	2.03494	0.670563
Mecp2	2.04156	0.68151
Bcas3	1.16791	0.69054
Rbm25	1.35439	0.704061
Mup21	2.30035	0.710512
Rrp12	1.73137	0.713569
Arhgef26	1.66252	0.729026
Eprs	1.07198	0.739434
Ripk4	2.17575	0.74862
Mcrip2	1.83883	0.789008
Optn	1.1938	0.800808
Uba5	1.42049	0.813026
Pfdn2	2.11955	0.827097
Ifi203	2.04875	0.832984
Nnmt	2.64703	0.845212
Pgm3	1.02327	0.85302
Sra1	1.58147	0.8844
Gtf2a2	1.70164	0.899087
Nr1h4	1.25353	0.90733
Gck	1.10785	0.91406
Aopep	1.366	0.928029
Tsc22d3	1.73595	0.935495
Pola1	2.65341	0.938565
Tspan4	1.39882	0.94848
Dysf	2.20761	0.997556
Mphosph8	2.49499	1.01218
Nampt	1.43673	1.04353
Hsph1	1.27635	1.05129
Arhgap31	1.55585	1.055
Etnk2	1.15845	1.1049
Gpcpd1	2.21136	1.11307
Sf3b1	1.33678	1.14828
Elovl6	1.12337	1.1779
Got1	1.77546	1.43577
Abcg5	1.34651	1.58705
Osbpl3	2.50696	1.59815
Mt1	2.78091	1.92955
Snora81	2.74852	2.23824
Terc	6.99368	2.96961
Snora23	2.82873	3.39146
Rnu3a	3.48419	3.60588
Snora69	6.25554	4.7735
Snord13	2.57754	5.17502

## Sheet: C(51)
gene_name	log2FC_Ribo-seq	log2FC_RNA-seq
Rock2	1.20116	1.04017
Gys2	2.13428	1.14311
Polr2h	2.40256	1.18405
Mob4	1.68331	1.1845
Vps13a	1.0058	1.24101
Tedc2	1.12907	1.25033
Hip1r	2.09005	1.29163
Fmo5	1.20663	1.30647
Ip6k2	2.1806	1.34587
Gpat4	1.08731	1.36035
Gne	1.23996	1.36525
Nmrk1	1.89211	1.39025
Mafb	1.72748	1.48086
Lipe	1.3161	1.48798
Pck1	1.71426	1.62785
Angptl4	1.72967	1.62858
Mbd1	1.71901	1.6442
Tat	1.46503	1.64613
Thrsp	2.68205	1.69703
Fam32a	1.04708	1.70145
Asl	1.42404	1.70203
Alas1	1.368	1.71536
Coq10b	2.86516	1.72148
St3gal5	1.08307	1.73455
Lpin2	1.1359	1.8021
Tef	1.41479	1.82378
Pfkfb1	1.30409	1.90645
Wee1	2.13728	1.95604
Tk1	2.48243	2.02956
Sds	1.72956	2.04413
Akap12	2.09151	2.18062
Eif4ebp3	2.62762	2.20247
Pfkfb3	1.96544	2.20591
Por	2.01867	2.32523
Pim3	1.65937	2.36142
Cidec	3.25656	2.36263
Dbp	3.15748	2.66867
Noct	1.71279	2.68762
Fkbp5	2.37888	2.71835
Per2	1.45759	2.7559
D17H6S56E-5	1.12676	2.76701
Rgs16	3.51976	2.81232
Lpin1	3.24242	3.34776
Upp2	3.94029	3.36366
Snora74a	2.95576	3.77431
Rmrp	3.95988	3.79972
Rpph1	3.02799	4.61571
Gm20594	2.77115	5.0665
Usp2	3.10986	5.69131
Scarna13	2.7312	6.05034
Vaultrc5	1.20778	7.23084

## Sheet: D(245)
gene_name	log2FC_Ribo-seq	log2FC_RNA-seq
Sytl5	0.940791	-6.85208
Gdf6	-4.75318	-6.08325
Gm12505	0.939756	-4.07206
Serpinb1a	-1.22923	-3.66564
Mfsd9	-5.39255	-3.60869
Slc38a1	-5.55377	-3.34187
Fabp5	1.49697	-3.33237
Spon2	-1.14252	-3.31957
Lratd2	-0.934789	-2.9877
Sult1c2	0.760777	-2.88461
Inhba	-2.13057	-2.83016
Lyz2	-1.08075	-2.80595
1810064F22Rik	-4.55277	-2.63191
Pdgfc	-0.998471	-2.58956
Nup37	0.849522	-2.56238
Gbp11	-0.824705	-2.53523
Sqle	-0.759529	-2.52314
Rfx4	-1.41427	-2.51102
Clec12a	-5.78707	-2.50172
Epb41l3	-1.3771	-2.4792
Slc25a30	0.19364	-2.44461
Xrcc4	1.94974	-2.38491
Ggh	0.309386	-2.38006
Sgsm1	-1.87389	-2.35804
Pfn2	-1.25598	-2.35146
Rtn4	-0.396165	-2.31016
1810014B01Rik	-5.07815	-2.30008
Marco	1.4097	-2.29952
Particl	-4.91155	-2.28952
Hsd3b5	-0.425208	-2.2819
Gm4952	0.323991	-2.27444
Cd53	-5.64616	-2.24522
Lyz1	0.330915	-2.21597
Folr2	-0.804054	-2.18332
Snrpc	0.505274	-2.15349
Pnpla3	-5.83012	-2.12571
Cstb	0.641341	-2.1
Fst	-2.59167	-2.07402
Scai	0.554541	-2.04273
Cyp51	-0.776667	-2.03334
Wfdc17	0.874612	-2.03172
Tm2d1	-0.970164	-2.02044
Gstm4	0.525575	-2.01364
Fam89a	-1.6663	-1.98764
Cybb	0.204475	-1.98747
Cystm1	-2.11528	-1.9801
Gm14295	-1.11222	-1.97443
Rdh11	-0.424892	-1.96914
Plscr1	-0.247814	-1.96344
Akr1c6	0.575845	-1.9623
Sh3yl1	-1.44871	-1.92995
Cd9	-0.539946	-1.9299
Pir	1.25346	-1.92429
Erg28	-0.940242	-1.90064
D630039A03Rik	-1.1073	-1.89849
Atp5g3	0.623931	-1.88798
Gbp10	-1.23337	-1.87625
Rnf144a	-2.42404	-1.86971
Slc39a8	-0.723423	-1.86872
Mvd	-0.623741	-1.86636
Umad1	-1.43381	-1.86609
Tmem126b	0.946448	-1.85767
Trappc4	-0.770968	-1.85624
Klhdc7a	-1.38972	-1.83746
Asah1	-0.542094	-1.81117
Ocel1	-4.96051	-1.80537
Mtx3	0.278957	-1.7992
Lgalsl	-0.86928	-1.79603
Sucnr1	-0.645402	-1.79193
Atp5f1	0.763349	-1.79057
1700001C19Rik	-0.296011	-1.78641
Cldn2	-0.705718	-1.78218
3110040N11Rik	-1.491	-1.76555
Leap2	-0.371106	-1.76248
Gbp6	-1.68415	-1.75272
Aif1	-0.635623	-1.74115
AU041133	0.80659	-1.73565
Atp5mpl	0.771533	-1.72888
Rpl9	0.84867	-1.72408
Lamp1	-0.516486	-1.7216
Ctss	0.954861	-1.72098
Ddc	-1.21108	-1.71058
Cdkl2	-1.04231	-1.70513
Hmgcs1	-0.639886	-1.70221
Yipf1	-1.09925	-1.69746
Immp1l	0.358009	-1.69297
Glo1	-0.111062	-1.69022
Hopx	-0.387439	-1.68981
Cd5l	-0.147941	-1.68911
Ndufb6	0.542627	-1.68728
Qpct	-1.59988	-1.68558
Nudt2	1.16283	-1.67973
Cops6	0.534853	-1.67497
Dbi	0.998669	-1.67457
Eepd1	-1.26361	-1.66753
Fuca2	-5.25584	-1.66159
Ormdl1	-0.917698	-1.66013
Dazap2	-0.837009	-1.65791
Nenf	-2.20361	-1.65429
Rnf130	-0.922653	-1.64656
Malsu1	1.14263	-1.64355
Selenos	0.291431	-1.63981
Akr1c13	0.210889	-1.62905
Plin2	-0.709357	-1.61812
Gm2788	-0.987896	-1.61727
Serpina7	0.427315	-1.61435
Arsg	-0.585568	-1.60051
Sdhd	0.261164	-1.58717
Fcna	0.204672	-1.5855
Adgre4	-1.63327	-1.58515
Akr1c20	0.660172	-1.58405
Sucla2	0.345651	-1.58375
Lims1	0.368119	-1.5822
Msr1	0.433971	-1.57743
Ndfip1	0.857673	-1.57508
Rnf11	-0.590858	-1.56776
Ifi47	-0.512758	-1.56416
Ociad2	-0.47633	-1.56305
Mrpl20	0.629234	-1.55799
Psma1	0.907888	-1.54864
Cmpk2	-1.4213	-1.54582
Agxt	-0.352263	-1.54342
S1pr1	-0.915501	-1.54288
Tifa	-0.934487	-1.54114
Lyrm9	0.642415	-1.54052
Ehhadh	-0.141536	-1.5387
Psma5	-0.210733	-1.53278
Cc2d2a	-0.495827	-1.5252
Ankrd46	-0.565621	-1.52253
Bphl	0.227118	-1.52253
Slc1a4	-2.99843	-1.52057
Crot	-0.110957	-1.51872
Spr	0.463161	-1.51255
Aldh1a1	0.399382	-1.51248
Akr1b3	-1.21623	-1.50319
Fdft1	-0.384281	-1.4874
Rhbdd1	-0.867642	-1.4844
Id3	-0.352274	-1.47396
Asap2	-1.34926	-1.47157
Jpt2	-0.598435	-1.45956
Ndufaf8	0.812186	-1.45522
Tyrobp	0.508666	-1.45089
Me1	0.377616	-1.45054
Qdpr	-0.523213	-1.44982
Cyp3a59	0.734373	-1.43564
Vamp4	0.65124	-1.43471
Tmem9b	-1.30063	-1.42868
Abhd17c	-0.566572	-1.42775
H2-Q5	-1.83744	-1.42752
Tmco1	-0.276228	-1.41413
Irgm1	-0.192614	-1.40988
Fam45a	0.28242	-1.40916
Tmsb4x	0.139941	-1.40915
Gm10319	-0.32105	-1.40549
Pgam1	-0.136799	-1.40499
Pon2	-0.509685	-1.40062
Tuba1c	-0.552312	-1.39836
Slc36a1	-1.0658	-1.39823
Mrps16	0.692753	-1.39318
Cox7a2l	0.789055	-1.38966
Arl5a	-0.264024	-1.38776
Hpgd	0.646902	-1.38669
Uqcrh	0.656709	-1.38216
Cyp3a11	-0.104375	-1.3771
Echs1	0.752952	-1.37678
Tomm7	0.905597	-1.3752
Pstk	-1.14093	-1.37246
Mir17hg	0.533051	-1.37025
Sigmar1	-0.333228	-1.36338
Dynlt3	0.381263	-1.36153
Sec22a	-1.84436	-1.36066
Chmp5	0.901287	-1.35686
Fam172a	-1.16868	-1.35598
C330021F23Rik	-5.52568	-1.35487
Ly6e	-0.784791	-1.3496
Cyp2r1	0.41501	-1.34832
Mzt2	0.345751	-1.34553
Tmem263	-0.346471	-1.34547
Iah1	0.962564	-1.34396
Gm4951	0.511734	-1.34316
Ctps2	-1.94791	-1.33961
Rab32	-0.257073	-1.33413
Gstm7	0.512062	-1.32878
Adh4	0.518128	-1.32311
Cops9	-0.518693	-1.31694
Mrnip	-5.96243	-1.31341
Bst2	0.142409	-1.31337
Mfsd4b3-ps	-1.79623	-1.30097
Yipf4	0.639516	-1.29984
Psmd13	0.437742	-1.29165
2610002M06Rik	0.543731	-1.2913
Ptpn3	-0.311982	-1.29072
D3Ertd751e	1.17884	-1.28893
Lonp2	0.204539	-1.287
Mettl9	-0.165141	-1.28525
Fam162a	-0.21476	-1.28461
Rpl30	0.74682	-1.2841
Atg5	0.589437	-1.28015
Nfu1	0.91079	-1.27742
Tm4sf4	-0.172228	-1.27612
C1qa	0.616486	-1.27519
Rpl39	0.879438	-1.27282
Fam136a	-0.716425	-1.27029
H2-Q9	0.578767	-1.26513
Sub1	-0.300631	-1.26355
Thnsl2	0.613234	-1.25985
Pxmp2	0.419791	-1.25949
Anapc11	0.335723	-1.25604
Slc39a11	0.327398	-1.25565
Rin2	-1.48289	-1.25081
Chmp2b	-0.749869	-1.24742
Leprotl1	-1.39775	-1.24602
Arhgap18	1.21655	-1.24591
Mrpl43	0.222327	-1.24239
Pdcd4	-0.216578	-1.24187
Rdh14	0.629324	-1.23292
Alcam	-0.766005	-1.22454
Rnf149	-1.10436	-1.22175
Serinc5	-0.205589	-1.22023
Rps13	0.486137	-1.21531
Aasdhppt	0.684742	-1.20983
Bloc1s5	-1.42202	-1.20513
Ccn1	-2.99794	-1.19923
Necab1	0.469957	-1.19562
Ccng1	-0.447434	-1.19438
Ndufs6	0.905481	-1.19238
Pter	-0.400658	-1.19225
Coa3	0.757524	-1.17443
Ralgps1	-2.74002	-1.16316
0610009B22Rik	0.683899	-1.16159
Ociad1	0.279915	-1.15759
Nek6	-0.979569	-1.15699
Gbp7	0.874503	-1.12791
Phka2	0.568249	-1.1244
Vamp2	-2.5254	-1.11888
Actr3	-0.485545	-1.11258
Tmem70	-0.541445	-1.10909
Mrpl22	-0.967479	-1.10407
Gabarapl2	0.549516	-1.08761
Pdhx	0.978104	-1.08746
Mid1ip1	-0.466663	-1.07671
Sumo3	-0.778343	-1.05756
Mdfic	-0.630945	-1.04058
Ccdc50	-0.82977	-1.02151
Fnbp1l	-0.344969	-1.011

## Sheet: E(8922）
gene_name	log2FC_Ribo-seq	log2FC_RNA-seq
Skp1a	0.975759	-1.19804
Atp5b	0.974893	-1.40627
Fabp3	-4.67927	-5.60932
Cldn34c1	-5.04532	-5.43355
Lrriq3	-3.87904	-3.87169
Astn2	-0.514865	-3.20302
Pla2g4a	-4.92579	-3.13155
Mansc1	-4.47792	-2.93902
Nubpl	0.973178	-2.9045
Kcnj10	-1.21626	-2.89009
Pcolce2	-5.13647	-2.85918
Slc22a27	-5.24027	-2.82387
Methig1	0.111882	-2.79868
Slc5a1	-4.89094	-2.76717
Adat2	-0.616755	-2.66842
Xrcc2	-0.502511	-2.63607
Gm9776	-5.33021	-2.60681
Btc	-1.33037	-2.45969
Pls1	1.25738	-2.45449
Ttbk1	-5.52006	-2.4002
Oas3	-2.38318	-2.39142
Stambpl1	-4.12508	-2.26726
Fam241b	-1.4053	-2.26552
Wdpcp	-0.184469	-2.26283
Kantr	-4.54727	-2.22095
Ank2	-5.55656	-2.21476
Ddit4l	-1.04613	-2.19695
Mr1	-0.795536	-2.15352
Mnat1	-0.0444136	-2.15265
Gm15343	-1.37609	-2.12351
Klhl28	-0.294145	-2.11348
Mmd2	-1.35115	-2.11154
Ckap4	-0.554804	-2.10577
Nudt16	-1.78511	-2.06349
Smim22	-4.43417	-2.05903
Ccdc3	-4.8598	-2.05013
Cela1	-1.38555	-2.04007
Cd300ld	-0.164813	-2.02206
Lyrm7	0.554591	-2.02139
Mup14	0.228714	-2.01099
Dnajc24	-4.19658	-1.98041
Arhgef9	0.403503	-1.96973
Mup7	1.06223	-1.95712
1110002J07Rik	-4.67031	-1.95645
Acyp2	0.258266	-1.94131
4930579G24Rik	-4.86703	-1.93428
Wdr76	0.21401	-1.907
Psme2b	-1.66081	-1.86167
Clec4a2	-3.97008	-1.86147
2310009B15Rik	1.95792	-1.86005
Chchd6	0.214954	-1.8576
Ly75	-0.379731	-1.84167
Plaat3	-0.497473	-1.83642
Dnmt3b	-4.95648	-1.8306
Tmem229b	-0.670242	-1.82615
Gm4285	0.503141	-1.80709
Serpinb6b	-4.8744	-1.80571
Cd14	2.10564	-1.7783
Plac8	1.84261	-1.75757
Stard3nl	-2.65007	-1.73377
Trhde	-0.967958	-1.73269
Ces2e	-0.49892	-1.72597
Aldoc	0.318493	-1.72597
Mrpl46	1.6411	-1.72331
Stmn1	0.69896	-1.71506
Gm5431	0.50255	-1.71296
Pgap3	-0.906533	-1.68782
Fcgr1	-1.47711	-1.67561
Tlr12	-1.29556	-1.67512
Fcgr4	1.52498	-1.66831
Spcs1	0.286686	-1.66482
Tmlhe	1.08561	-1.66054
Chic1	-0.86243	-1.65888
Chst14	-4.98108	-1.65687
Cadm4	-5.81429	-1.6503
Gabra3	-5.13525	-1.64755
Bloc1s3	-2.97707	-1.645
Bank1	-0.729748	-1.64091
Il1rn	-4.55011	-1.64056
Lum	-0.201482	-1.63863
Zfp30	0.216819	-1.63546
Gna14	-0.787314	-1.63422
Dnajc12	-0.561555	-1.63409
Adamdec1	-4.18646	-1.62952
9030619P08Rik	-1.08906	-1.62406
Alyref	1.00166	-1.62397
Pin1	-0.0850978	-1.60277
Rad51b	-4.60033	-1.59929
Sprn	-4.04907	-1.59783
Agk	-1.34403	-1.5917
St6gal1	-0.537393	-1.5893
Itga8	0.217513	-1.58878
Gm11992	-4.04208	-1.58768
Xk	0.438745	-1.58731
Uxs1	-1.51713	-1.58447
Lrp11	0.493059	-1.57972
Cox7a2	-0.28638	-1.57716
Alg14	-1.34652	-1.56958
Adamts6	-3.93063	-1.56132
Rab8b	0.0830949	-1.55383
Usp46	-0.697851	-1.55272
Slc15a5	0.906181	-1.54056
Metrn	-4.30884	-1.53762
Tcp11l1	0.992562	-1.53385
Slc25a5	-0.476226	-1.52864
Mad2l1	0.390926	-1.52718
Itih5	-1.0301	-1.52365
Ces2b	-0.646231	-1.51814
Fam151b	-1.89613	-1.51109
Clec14a	-0.748043	-1.51062
Gpx1	-0.199338	-1.49953
Pdk4	-1.32943	-1.49942
Hnmt	0.719673	-1.49541
Crp	-0.185162	-1.4947
Sec61b	0.635095	-1.4888
Rom1	-3.60538	-1.48721
Pgk1	0.699282	-1.48641
Wnt2	0.461457	-1.48595
Il33	-4.61931	-1.48458
P2ry13	-4.38086	-1.48412
Tbxas1	-1.59237	-1.47312
Igsf11	-1.44197	-1.47274
Nicn1	-0.757679	-1.47222
Hpf1	1.14407	-1.47091
Eef1akmt1	0.41323	-1.47051
Zfp120	0.152171	-1.47018
Ubqln2	0.69882	-1.46693
Plekhb2	-0.121158	-1.46665
Selenof	0.443656	-1.46637
Ebpl	0.696169	-1.46247
Tbc1d9	0.0112361	-1.44719
Cmklr1	1.20309	-1.447
Pm20d2	-1.06974	-1.44684
Vbp1	-1.08509	-1.4458
Il22ra1	-2.76114	-1.44434
Pdzk1ip1	-5.08564	-1.43846
BC052040	1.19715	-1.43276
Ttc33	0.713505	-1.43044
Rbm45	0.580324	-1.42914
Plet1	0.304894	-1.42845
Gm8883	-0.384513	-1.42265
Veph1	-6.07271	-1.42111
Dnajc27	-4.5681	-1.42092
Nek2	-5.01075	-1.41669
Tnfrsf19	0.0272318	-1.41472
B230307C23Rik	-2.12626	-1.4147
Nsmce1	0.250252	-1.41315
Chchd2	-0.956003	-1.40868
Gm10639	-2.29977	-1.40413
Samd8	-0.552654	-1.40173
Galk2	-0.0695766	-1.40071
Hsd17b7	-0.718003	-1.39859
Uba6	0.498005	-1.38982
Etfa	0.843782	-1.3854
Pawr	1.13388	-1.38279
Svbp	1.7155	-1.38183
Tspan7	-0.251192	-1.38065
Adgre1	-0.0904987	-1.38007
Gm15501	-0.116601	-1.37767
Ube2z	-0.301068	-1.37577
Egln3	0.858091	-1.37203
Olfm3	-0.672518	-1.37106
H2-DMa	-4.73655	-1.36929
Mrpl44	1.15531	-1.36843
Clec2i	0.279514	-1.3632
Fundc2	0.488627	-1.36296
Chst2	1.39858	-1.36066
Uchl3	1.27577	-1.35912
Psmb7	0.4767	-1.35704
Lnx1	-5.17921	-1.35422
Gas1	0.487964	-1.353
Sypl	0.0130092	-1.35245
Gabarapl1	-0.676386	-1.35155
Mbl2	0.336094	-1.34808
Mup20	0.0365664	-1.343
Lynx1	-4.40056	-1.34173
Swsap1	-6.15148	-1.33942
Rspo3	0.673467	-1.33873
Prdx3	-0.185746	-1.33827
Ndufb9	0.906258	-1.3356
Dtd2	-0.905741	-1.33559
Phf6	-0.0718088	-1.3336
Siva1	-1.29446	-1.33305
Mrps22	-0.216	-1.33133
Dhrs7	-0.271725	-1.33066
Clec7a	1.53692	-1.32992
Rdh9	-0.484725	-1.3264
Mogat1	0.50648	-1.32439
Nme1	0.209253	-1.32434
Dph6	1.26703	-1.32328
Grk5	-1.83579	-1.32152
Jmjd7	-1.15109	-1.31932
Mkrn2os	-0.727491	-1.31682
Fktn	-1.01274	-1.31475
Npc2	0.237817	-1.31435
Fdps	0.423463	-1.31308
Klhdc7b	-0.531914	-1.31124
Grcc10	-0.192262	-1.31075
Fbp1	0.295092	-1.30829
Hist1h2bc	0.101953	-1.30738
Cd24a	-4.70557	-1.30597
Ckb	0.71175	-1.30229
Rarres1	-0.130561	-1.30128
Sdhc	-0.583064	-1.29767
Washc3	-0.056076	-1.2974
Arf4	0.196177	-1.2964
Ndufc1	0.211829	-1.29366
Cisd1	0.295671	-1.29099
Cyp2j5	-0.100155	-1.28903
5033403H07Rik	-2.97725	-1.28832
Pmp22	-0.25458	-1.28803
4933431E20Rik	-0.123918	-1.28706
Il1b	1.44186	-1.28485
Dcn	0.00215119	-1.28204
Glb1	-0.319414	-1.28145
E2f2	-4.99069	-1.27906
Yars2	-0.252267	-1.27861
Eif6	0.213305	-1.27795
Timm22	-0.505386	-1.27719
Gm14391	-0.893515	-1.27694
Msi2	-0.648526	-1.27337
Ccdc25	0.475833	-1.26879
Ppt1	-0.277074	-1.26852
Tceanc	-5.34372	-1.26816
Rcn2	-0.0265941	-1.2679
Srgn	0.0774564	-1.26527
Mfge8	0.0777453	-1.26434
Umps	-0.328456	-1.26332
Agbl3	0.520225	-1.26293
Slc39a5	-4.70556	-1.26211
Rps3a1	0.524146	-1.26175
Zbtb33	-1.02256	-1.26112
Tmem9	-1.56711	-1.25952
Tmem192	-0.174045	-1.25754
Mpzl1	-5.58869	-1.25686
Stx3	-2.2745	-1.25416
Ldha	0.911726	-1.25406
Tspo	0.165642	-1.25305
Itgb1bp1	-0.309905	-1.25246
S100a10	0.41508	-1.25091
Sarnp	0.470431	-1.25006
Eno1	0.671004	-1.24136
Ppp1cb	0.193626	-1.2409
Slc15a3	-1.07711	-1.24
Pgrmc2	-0.515535	-1.23931
Pmvk	0.914529	-1.23786
Sgce	-1.27586	-1.23629
Pithd1	-1.12853	-1.23479
Wdr83os	0.22659	-1.23375
Ntrk2	-0.702476	-1.23274
Tcf21	-1.35767	-1.23206
Slc44a3	-0.196193	-1.23034
Zfp867	-1.29902	-1.2297
Hdhd3	0.147	-1.22883
Gm5524	-0.878021	-1.22677
Trappc2	-0.0369194	-1.22488
Prxl2b	-0.116814	-1.22328
Tmem128	-0.535199	-1.22307
Ces2g	-0.928828	-1.22305
Taco1	-0.386867	-1.2224
Saa3	-1.39656	-1.22197
Rps9	0.693886	-1.22093
Bbs9	-1.50667	-1.22037
Frat1	-0.727243	-1.21901
Ggct	0.841629	-1.21761
Ddt	0.218499	-1.21758
Ppa2	0.917752	-1.21607
Acyp1	-5.42912	-1.21606
Timd4	-2.95156	-1.21463
Enpp6	-5.52583	-1.21154
Zfp72	-4.27479	-1.21148
Gatm	-0.357887	-1.211
Ghitm	0.453706	-1.2107
Mettl15	1.33532	-1.21042
Naip2	0.169888	-1.20826
Pls3	0.456475	-1.20795
Pnp2	-0.0889174	-1.2038
Psma2	-0.224542	-1.20368
Gchfr	0.548266	-1.20141
Stard4	0.0652834	-1.19862
44262	0.867211	-1.19823
Slc25a24	-4.91215	-1.19659
Lrrc29	-5.68994	-1.1953
Kctd12	0.143069	-1.19523
Apof	-0.350827	-1.19441
F8a	-1.79615	-1.19317
Rps20	0.549493	-1.19226
Rasgrp1	-4.82782	-1.1917
Napepld	-5.3934	-1.19143
Tlr7	0.534529	-1.19123
Nsdhl	-0.441991	-1.1897
2610528J11Rik	-0.674514	-1.18957
Abcd2	0.397885	-1.18886
Clec4n	0.798671	-1.18844
Them6	0.65339	-1.18628
Gch1	0.138931	-1.18622
Slc25a40	1.02785	-1.18582
Agpat5	-0.333426	-1.18352
Adipor2	-0.682695	-1.18133
Cdpf1	-1.1969	-1.18094
Ntn4	-3.06669	-1.18085
Rraga	0.82461	-1.18068
Tpx2	0.553777	-1.18059
Polr2g	-0.21989	-1.17985
Ly6a	0.346319	-1.17952
Clec4a1	-0.665789	-1.1795
Stx8	1.11879	-1.17888
Pecr	0.80445	-1.17828
Gng10	-5.3157	-1.1775
Tfpi2	0.0142744	-1.17594
Arhgap19	-5.63587	-1.17589
Apom	0.115597	-1.17384
Gyg	0.899182	-1.17383
Emc7	-1.1052	-1.1692
Cd74	-0.54422	-1.16913
Ran	-0.316163	-1.1678
Mocs3	-0.0611508	-1.16779
Pnp	-0.561488	-1.16776
Galk1	-0.320752	-1.16769
Fam171b	-4.18656	-1.16669
Mmgt1	-0.47997	-1.16589
Bdh1	0.553691	-1.16578
Spp2	-0.17842	-1.16351
Tstd3	-0.445	-1.16291
Dpy19l3	-0.872134	-1.16145
Stxbp6	-0.0164697	-1.1607
Car3	0.683811	-1.15978
Olig1	0.460795	-1.15805
Acsf3	-0.659287	-1.15801
Prdx4	0.732401	-1.15775
2300009A05Rik	-1.93863	-1.1572
Aldh1b1	0.407644	-1.15299
Zfp770	-2.55678	-1.15205
Smpdl3a	-0.113727	-1.15185
Gm32461	0.0865073	-1.15131
Mis12	0.358241	-1.15064
Rps7	-0.138004	-1.15004
Atpaf1	0.812267	-1.14989
Car2	0.656954	-1.14917
Ccni	0.00118781	-1.14917
Ifi27l2a	0.113996	-1.14881
Ciao2a	0.0964775	-1.14785
Tpi1	0.555256	-1.14723
Il13ra1	-0.400906	-1.14478
Acads	0.0566334	-1.14449
Cd164	-0.736389	-1.14429
Srp14	0.859604	-1.14413
Qsox2	-1.27757	-1.14368
Trub2	-0.222217	-1.1431
Samd4	0.287303	-1.14271
Tmem26	-1.37122	-1.14218
Snrpb	-0.378156	-1.1419
Arhgap30	0.163174	-1.14114
Rtraf	0.76275	-1.13978
Ccdc66	-0.81198	-1.13919
Lsm2	1.65543	-1.13899
Emc3	-0.0344219	-1.13848
Mrps18a	0.464345	-1.13794
Paip2b	-0.122936	-1.1379
Meiob	-0.39736	-1.13737
Amot	-0.511046	-1.13556
Iigp1	0.000630533	-1.13541
Psmb5	-0.265231	-1.13437
Lsm8	-0.0956851	-1.13354
Apool	0.683266	-1.13317
Smim26	0.919134	-1.13309
Lnpk	0.435165	-1.13294
Commd6	0.692118	-1.13201
Olfm1	-2.55952	-1.12793
Ndfip2	-0.393742	-1.12782
Tmem98	-1.41728	-1.12778
Fundc1	-2.2806	-1.12778
Spata22	0.363037	-1.1274
Sgsh	-0.354022	-1.12542
Nqo1	-0.641898	-1.1253
Timd2	-0.420116	-1.12527
Trf	-0.669027	-1.12521
Mamdc2	-0.877181	-1.12509
Cldn12	-0.443453	-1.12471
Eif1ax	0.410244	-1.12387
Cav2	1.72253	-1.12304
Derl3	-1.48068	-1.12257
Oard1	-0.823436	-1.12084
Lipo3	-5.47647	-1.12057
Sdha	0.849386	-1.1203
Rfc3	-2.17785	-1.12026
Mthfsd	-5.9587	-1.12008
Maob	0.72293	-1.11836
Rhobtb3	-0.598436	-1.11823
Amn1	-0.541798	-1.11805
Unc50	0.331948	-1.11761
Fbxl21	-1.37326	-1.11667
Hmmr	-2.51319	-1.11466
Lgmn	-0.167877	-1.11444
Cd47	-0.353245	-1.11371
Lrpap1	0.0869043	-1.11196
Pemt	-0.220727	-1.11168
Akr1c12	0.698068	-1.11116
Mbtps2	-1.27581	-1.11104
Mgmt	-1.22164	-1.11091
Elovl5	-0.596393	-1.11047
Siglece	-0.921607	-1.11034
Ssc4d	0.474857	-1.11026
Aurka	-1.85757	-1.11021
Gm14288	1.29802	-1.10857
Fgg	-0.907474	-1.10839
Elovl2	-0.970509	-1.10837
Cln6	-5.21416	-1.10573
Vdac3	0.429054	-1.10488
Cptp	-1.09673	-1.10484
Peli3	0.470256	-1.10413
Gla	-1.71236	-1.10403
Actg1	-0.119232	-1.10287
Ufc1	0.904886	-1.10253
Sptssa	-0.438872	-1.10003
Cd302	0.237165	-1.09998
Psmg4	0.690197	-1.09974
Tomm5	0.215781	-1.09942
Cd300a	0.90057	-1.0989
Grpel1	-0.846987	-1.09882
9530068E07Rik	-0.964892	-1.09851
Mospd1	2.00442	-1.09681
Snrpb2	0.827825	-1.09623
Cnp	-0.294078	-1.09619
Lrrc14b	0.217226	-1.09523
Arl15	-0.18846	-1.09456
Col12a1	0.429963	-1.09238
L2hgdh	-0.840517	-1.09192
Atp5a1	0.743309	-1.09129
Nudt21	0.173159	-1.09122
Prkca	0.326669	-1.09025
Acsl5	-0.825506	-1.08903
Rpl4	0.0982334	-1.08804
Gm44805	-0.472943	-1.08766
Nipsnap3b	0.149961	-1.08763
Ubxn8	0.864481	-1.08622
Khdrbs3	-0.128321	-1.08582
Mvk	-0.23993	-1.08495
Mrpl11	-1.66318	-1.08415
Ms4a6d	-4.87439	-1.0835
Msmo1	-0.145346	-1.08347
4930556M19Rik	-5.94816	-1.08329
Ifi44	0.769996	-1.08152
3110082I17Rik	0.700955	-1.08105
Ndufaf2	-2.1938	-1.08014
Tmem88b	0.442623	-1.07986
Gfm1	0.395909	-1.07973
Rpl7	-0.326584	-1.07959
Dad1	-0.226703	-1.07855
Smug1	0.120257	-1.07851
Ear2	-5.75336	-1.07753
Ncald	-1.2622	-1.07731
Efemp2	0.772189	-1.0766
Xkr9	-0.48422	-1.07553
Sc5d	-0.601049	-1.07498
Fars2	0.222443	-1.0741
Dck	0.385293	-1.07402
Rplp2	0.15617	-1.07389
Arl1	0.568269	-1.07381
1810008I18Rik	0.172604	-1.07381
Akirin1	-0.47664	-1.0736
Sdf2l1	-1.10147	-1.07288
Hsd11b1	-0.347119	-1.07086
Uqcrfs1	0.555739	-1.06957
Pdzrn3	-2.09721	-1.06946
Ikzf1	-0.160716	-1.06856
Morf4l1	0.773339	-1.06771
Bace2	1.40884	-1.06759
Calu	-0.161469	-1.06723
Cpb2	0.00386475	-1.06616
Nectin3	-0.421371	-1.06597
Xxylt1	-5.54537	-1.06572
Hsd3b4	-1.08249	-1.06471
Sort1	0.473513	-1.06469
Avpi1	0.77643	-1.06467
Wfdc2	-0.715657	-1.06379
Eef1b2	-0.21383	-1.06318
Nit2	0.539661	-1.06292
Ubqln1	-0.1876	-1.06251
Smim7	0.834717	-1.06116
Echdc3	-0.259198	-1.06115
Cd83	0.435465	-1.06044
Rab5a	0.505202	-1.05989
Tprkb	0.270788	-1.05959
Selenop	-0.673677	-1.05887
Dlat	-0.396846	-1.05887
Klhl26	-2.42381	-1.05882
Cfh	-0.0345871	-1.05834
Ethe1	-1.42735	-1.0581
Smyd4	-0.526214	-1.05742
Cish	-2.15029	-1.05687
Arf2	-1.06153	-1.05443
Ndufaf5	1.87503	-1.05437
Bud31	0.793765	-1.05429
Lrp12	-0.717495	-1.05423
Glod4	-0.0409885	-1.05315
Pea15a	0.700792	-1.05026
Elk3	-1.15885	-1.04928
Trim32	0.4559	-1.04849
Tuba1a	-0.502806	-1.04787
Rpl41	-0.136462	-1.04761
Ly86	0.743064	-1.04723
Nedd8	0.0266143	-1.04646
Pycr2	0.0377395	-1.04559
Echdc1	0.766338	-1.04462
Ahi1	-4.47788	-1.04445
B4galnt3	-1.43423	-1.04403
Lpcat1	-2.03873	-1.04365
Serpina12	-0.165226	-1.04363
Commd1	0.513932	-1.04247
Ropn1l	0.881168	-1.04209
Dut	-1.63455	-1.0405
Smlr1	0.162718	-1.03766
H3f3a	0.749235	-1.03703
Capn5	-1.57671	-1.03644
Cdyl2	-1.81026	-1.03609
Cited2	-0.756525	-1.03572
Smim19	0.358826	-1.03562
Hdhd2	-0.246346	-1.03438
Urah	-0.0193298	-1.03397
Eif2s3x	0.110368	-1.03388
Gypc	-0.641199	-1.03363
Bcl10	-1.77167	-1.03171
Nudt7	0.674307	-1.0317
Qrsl1	1.10655	-1.03136
Enpp4	-0.109173	-1.03122
Cr1l	0.437682	-1.03097
Cdc42se2	-0.862044	-1.03013
Myorg	-1.03192	-1.02864
Slc10a1	-0.522786	-1.02864
Tubb4b	-0.275483	-1.0286
Chm	0.515208	-1.02729
Pigh	-5.42489	-1.02725
2410022M11Rik	-1.29377	-1.02673
Gcat	-0.453232	-1.02631
Crppa	0.157283	-1.02558
Gcsh	-0.0656194	-1.02542
AW554918	-5.04402	-1.02478
Aamdc	-0.101857	-1.02428
1110012L19Rik	-0.15902	-1.02408
Mettl5	0.712594	-1.02321
Nqo2	-0.156154	-1.02285
Rhod	-0.904385	-1.02167
Slc2a9	-0.511846	-1.02053
Stap1	0.319274	-1.02033
2810004N23Rik	-0.391065	-1.01987
Cyp2d12	-0.390165	-1.01918
Gm13889	-4.46652	-1.01795
Cdc42	0.985896	-1.01795
Stt3a	-0.241553	-1.01706
Qprt	0.126237	-1.01705
Atg10	0.401996	-1.01702
Adam9	-0.0689019	-1.01638
Itm2b	0.148041	-1.01625
Thoc3	-0.676175	-1.01613
Pars2	-5.56525	-1.01558
Fn3krp	0.296671	-1.01492
Tmem123	-0.598144	-1.01318
Ap5b1	1.12438	-1.01289
Perp	-0.588054	-1.01178
Mgst1	0.147043	-1.00985
Atf1	-0.200283	-1.00944
Mup1	-0.819773	-1.00913
Ttr	-0.133884	-1.00852
Smdt1	-0.0993107	-1.00777
Rsl24d1	0.481525	-1.00761
Smim8	0.36432	-1.00637
Akr1b10	-4.67927	-1.00529
Timm13	0.0746003	-1.00417
Zbp1	0.346061	-1.00391
Zdhhc21	-0.523063	-1.00357
Ctsb	-0.3078	-1.00333
Eef1a1	0.227902	-1.00245
Tex261	-0.365732	-1.00231
Sf3b6	0.495168	-1.00219
Atp5l	-0.441453	-1.00153
Selenoh	1.16829	-1.00122
Isoc1	-0.24726	-1.00017
Smim14	-1.0051	-0.999916
Nsun3	0.772606	-0.999906
Trappc13	0.737609	-0.999879
Sgtb	-1.60029	-0.999718
S1pr2	-6.21873	-0.999068
Nsun6	0.212492	-0.998726
Tmem242	-0.695564	-0.99855
Hmgn5	0.955742	-0.998429
Calm2	0.852763	-0.997594
Atxn10	0.794863	-0.997249
Tmem97	-0.797389	-0.997178
C4bp	0.390421	-0.996961
Tmem160	1.15341	-0.996875
G6pdx	-0.234019	-0.996123
Ambp	-0.449269	-0.995641
Ctbs	-0.662793	-0.995465
Rpusd2	-1.13249	-0.995048
Rpl23	0.352325	-0.994892
Mtfr1	-0.41699	-0.99459
Clec1b	0.679205	-0.994017
Nudcd1	0.634117	-0.993987
Nudt18	-0.571647	-0.992924
Ncbp2	0.229867	-0.992781
Rhoa	0.0762389	-0.992666
Rhbg	0.853084	-0.992312
Suox	0.314993	-0.992307
Fam76b	-2.70184	-0.992287
Anp32e	0.8351	-0.990795
Ugt3a1	-0.64092	-0.990411
Acat2	-0.126726	-0.990094
Srsf9	-1.28528	-0.989712
Pon1	0.839839	-0.989284
Cacybp	0.949028	-0.988765
Pcna	0.795649	-0.988648
Rcor3	0.574199	-0.988299
Tomm70a	0.121664	-0.987117
Mapk1	0.0469294	-0.986635
Arpc3	0.707739	-0.98529
Prorsd1	-0.841419	-0.985218
Prkaca	-0.580972	-0.983122
Fam98b	0.130142	-0.982375
Mug2	-0.714061	-0.981264
Pggt1b	1.06028	-0.979622
Naa30	-0.0977911	-0.979573
Vhl	-0.821112	-0.978444
Vps29	-0.000688755	-0.978345
A130010J15Rik	0.797318	-0.978325
Ddah1	-0.543744	-0.978067
Klhl6	0.0424049	-0.977757
Abracl	0.898651	-0.977702
C8g	-0.581925	-0.97762
Gm14322	-0.482515	-0.977613
Txnl1	0.436017	-0.977019
Klhl24	-0.0465982	-0.976748
44449	0.199399	-0.976342
Vti1b	0.318379	-0.975311
Clns1a	-0.574264	-0.975135
Cript	0.873438	-0.975046
Myl12a	0.816924	-0.973688
Etfdh	0.491926	-0.973009
Bet1	0.365076	-0.973
Snhg6	-1.12849	-0.972212
Cxcl10	1.09992	-0.971998
Psmd10	-0.190716	-0.971483
Commd8	-0.423914	-0.97093
Slc25a17	-0.29981	-0.970899
Rps23	-0.377869	-0.970378
Lancl2	0.180645	-0.9702
Lsm4	-0.629722	-0.970031
Zfp512b	-1.47484	-0.969892
Igf2bp2	0.966074	-0.969799
Gm1966	-1.52729	-0.968472
Esd	0.454959	-0.968247
Atp6v1e1	0.256251	-0.96762
Saraf	-0.391586	-0.966475
Ids	-0.947131	-0.96625
Arf3	-0.595263	-0.965587
Vps26c	-0.468904	-0.965559
Rps21	0.702153	-0.964955
Ugt3a2	-0.17253	-0.964171
Bpnt1	-0.0555037	-0.963871
Dctn3	0.188751	-0.963473
Azin2	0.561528	-0.963353
Mrpl34	-1.00779	-0.962084
Itpripl2	0.0859992	-0.96207
Gbp2	1.71224	-0.961218
Polk	0.0280289	-0.961102
Psph	-0.926333	-0.960819
Psmb1	0.512722	-0.960403
0610040J01Rik	-1.43397	-0.960364
Cfi	-0.481212	-0.959418
Rab28	-0.622048	-0.958625
Eef1akmt2	-5.23937	-0.957294
Rnf138	-0.2398	-0.95723
Cenpq	-4.54496	-0.957033
Mrfap1	-0.670403	-0.956683
Mfsd12	-0.318557	-0.95623
Mipep	-0.208908	-0.956058
Zfp626	-0.728938	-0.955501
Pccb	-0.0841453	-0.955015
2310009A05Rik	1.00861	-0.954113
Ndufc2	0.549143	-0.953892
Sqor	0.768875	-0.953593
Galns	0.986628	-0.953333
Wdr60	-1.55828	-0.952787
Cmc2	1.54966	-0.952241
Enpp5	-0.55269	-0.950657
Nfyb	-0.529968	-0.950184
Slc25a4	-1.98718	-0.949626
Rchy1	-0.114611	-0.948275
Sccpdh	1.46698	-0.948237
Tmx4	-0.189996	-0.947812
Degs1	-0.646996	-0.947776
Rarb	-0.648815	-0.946939
Nudt1	-0.28947	-0.945912
Adgrv1	-0.286537	-0.945767
Tmem38b	0.0060298	-0.944873
Tmem33	-0.261746	-0.944146
Oasl1	-0.917262	-0.942604
Dcun1d5	0.0263738	-0.941571
Mrps33	0.900846	-0.941489
Rpl22l1	0.869429	-0.940958
Dtx3l	-0.0219665	-0.939708
Cmpk1	0.600158	-0.939698
Mrpl32	-0.45522	-0.939008
Rilpl2	0.311463	-0.939005
Prr16	-1.19674	-0.938205
Mpeg1	-0.551667	-0.938137
AU022252	-1.54395	-0.937546
Rbp4	0.24276	-0.937259
Rab10	-0.0339568	-0.937181
Guk1	-0.0128644	-0.936124
Carf	1.37095	-0.935953
Adal	-0.205618	-0.935012
C1d	0.374087	-0.934496
Prps1	-0.00567535	-0.933348
Asb2	-5.30179	-0.933012
Ndufb8	-0.142123	-0.93282
Gm10767	0.307632	-0.932087
Trappc2l	0.178487	-0.931997
Mrpl1	0.881174	-0.931987
Nipsnap2	-0.859931	-0.931587
Mrps36	-0.335527	-0.930553
Gtf2e2	0.942908	-0.929953
Lamp2	-0.295147	-0.92915
Psmd5	0.907981	-0.928822
Mettl26	-0.180063	-0.928577
Dera	0.331453	-0.928162
H2-Aa	-1.13373	-0.928105
Chrna4	-5.79158	-0.927962
Hspe1	0.302016	-0.927466
Hmgb3	-0.456089	-0.927138
Gpc4	-0.155959	-0.926235
Samhd1	0.500864	-0.92593
Yipf5	-0.232858	-0.925103
Timm8a1	0.0478713	-0.924991
Cfhr2	-0.623587	-0.924783
Eif3e	0.115511	-0.924447
Mpst	-0.136831	-0.923631
Lypla1	-0.250756	-0.923103
Rps27rt	-0.12682	-0.922893
Plekhf2	-0.490189	-0.922708
Map2	-4.72353	-0.922286
Armc1	-0.631795	-0.922207
Macrod1	-0.825656	-0.921911
Cnpy2	0.304125	-0.921898
Fcer1g	-1.25674	-0.921369
Tmem19	0.228943	-0.921163
Larp1b	-0.5403	-0.921151
Eif3m	0.844451	-0.920986
M6pr	-0.699967	-0.920321
Pigyl	-0.583141	-0.919235
Rap2b	-1.90303	-0.919125
Tmem177	-0.504308	-0.918955
Tm2d3	0.191767	-0.918235
Rpn2	-0.455052	-0.917714
Cyp2c29	-0.245224	-0.917442
Lrrc59	-0.274788	-0.914988
Cox7b	0.0366972	-0.914465
Rdh1	-1.13193	-0.914242
Exosc3	0.664135	-0.913545
Rras2	-1.44003	-0.912781
Timm29	-0.564273	-0.911431
Zfp953	0.278191	-0.911347
Pnpla8	0.534221	-0.911217
Pnrc2	0.210724	-0.910803
Zdhhc9	-0.347947	-0.910691
Cradd	-0.940857	-0.910377
Snrpd3	0.715126	-0.910084
Mbl1	-0.299586	-0.909832
Cyba	0.429621	-0.909468
Naf1	-1.50199	-0.908908
Chchd3	-0.0262665	-0.908806
Ubxn1	-0.768963	-0.908284
Shisa5	-1.14025	-0.907871
Rps15a	0.923447	-0.907418
Orm2	0.692547	-0.9063
Strap	-0.001731	-0.905851
Mettl23	0.152816	-0.905048
Tmem14c	0.0420241	-0.904612
Mrpl55	-0.706136	-0.903931
Tmx3	-0.470464	-0.903918
Ugcg	0.0391409	-0.903654
Arl6ip5	-0.48133	-0.903451
Cutal	-1.1919	-0.903449
Gm16551	0.0485985	-0.903284
Ppih	-2.51955	-0.90279
Rad23b	-0.0711163	-0.902521
Cdkn2aip	-1.2052	-0.902296
Gm42274	-1.2817	-0.901832
Rer1	-0.262738	-0.901109
Pdcd7	0.125882	-0.901086
Cpsf6	-0.50516	-0.900852
Atg101	0.598758	-0.900809
Orai1	-1.92124	-0.900641
Mpp7	0.215983	-0.899541
C5ar2	0.624817	-0.898714
Zfp994	-0.704416	-0.898689
Itm2c	-0.678411	-0.898628
Foxa1	-1.39386	-0.898223
Aldh2	0.69857	-0.898221
H2-Eb1	0.262709	-0.897852
Nmnat3	-0.974614	-0.897479
Tmem267	-0.142295	-0.896971
Mfsd6	-0.508025	-0.896911
Laptm4a	-0.576466	-0.896112
Nt5dc1	1.17344	-0.895753
Tmed2	-0.66412	-0.895658
Cpeb3	-0.939438	-0.895551
Zfp367	-1.54921	-0.894998
Ttc32	0.00542594	-0.894457
Uqcr10	0.0121837	-0.894378
Casp3	0.893868	-0.894377
44256	-2.36823	-0.894318
44256	-0.309872	-0.894318
Cd36	0.0592155	-0.894288
Gadd45a	-0.127966	-0.892414
Rnf13	0.0755524	-0.891954
Epm2aip1	-0.490742	-0.891627
Lamtor5	-1.459	-0.890965
Mre11a	0.943066	-0.890678
Hamp2	-0.0332296	-0.889072
Snapc5	-0.0258889	-0.889065
Tmem168	-0.665822	-0.888316
Adh5	0.818566	-0.888035
Hacl1	0.104476	-0.887937
Qsox1	-0.904534	-0.887882
Asnsd1	-0.904521	-0.887493
Cox6a1	0.0704253	-0.887007
Bcl2l2	0.166812	-0.886913
Lrrc42	0.663181	-0.886628
Arpin	-1.10805	-0.886113
Klhl13	0.785014	-0.885381
Prxl2a	0.484825	-0.884893
Micos13	-0.805432	-0.884811
Ube2e3	0.388448	-0.884638
C330018D20Rik	-0.81371	-0.884089
Smim13	-0.518151	-0.882902
Apmap	-0.36623	-0.882689
Ino80c	-2.78054	-0.882525
Ppia	-0.036314	-0.882373
Car8	-0.316033	-0.882176
Mmadhc	0.54373	-0.882025
Scpep1	-1.07634	-0.881835
Rpa1	0.73392	-0.881691
Wrap73	0.248515	-0.88159
Rfx3	-1.8978	-0.881547
Ces2c	-0.215456	-0.881369
Lpcat2	-1.66595	-0.880563
Vkorc1	-0.402327	-0.880258
Cald1	-0.754213	-0.880236
Cd52	-4.38767	-0.880155
Cyp2c67	-0.0850168	-0.879133
Fig4	0.11041	-0.879057
Rbbp4	0.669588	-0.87904
Ccnh	-0.0518378	-0.878635
Glrx5	0.217218	-0.878321
Ugt2a3	0.650024	-0.878255
Papolg	-1.05993	-0.878224
Ror1	-1.86764	-0.876698
Arl2bp	-0.916216	-0.876473
Higd1a	0.105656	-0.876322
Pepd	0.30173	-0.876095
Mettl27	-0.747642	-0.87588
Rnpc3	1.44974	-0.874109
Itih2	0.0545752	-0.873036
Fgfrl1	-1.54467	-0.87277
Dctn4	0.0246597	-0.872753
Maged2	-1.18717	-0.871984
Slc35a2	-1.30195	-0.869939
Zfp111	-2.34818	-0.869676
Rhou	-0.861541	-0.868862
Gtf2b	0.787201	-0.868637
Carhsp1	-0.00122057	-0.86822
Pgap1	-0.744298	-0.868169
Nxt2	0.49714	-0.866989
Gm10033	-0.0223294	-0.866007
Gsr	0.284717	-0.865938
Reep5	-0.543434	-0.865887
Atic	0.439524	-0.865377
Gc	-0.0714602	-0.865156
Akr1d1	-0.0798087	-0.865122
Tmem64	-0.844125	-0.864613
Dpys	0.82436	-0.863703
D11Wsu47e	-0.541407	-0.863489
Lhfpl2	-1.22349	-0.863488
Med19	-1.28352	-0.862848
Dipk1a	-0.306852	-0.862607
Caprin1	-0.994381	-0.861998
Lrrc25	-0.626985	-0.861552
Ccr2	-0.66771	-0.860836
Mtrf1	-0.081284	-0.860129
Prdx6	0.55535	-0.860055
Creg1	-0.624741	-0.85912
Cirbp	-0.960376	-0.859114
Uqcrc2	0.694687	-0.858873
Spryd7	0.240937	-0.858645
Calm1	0.531833	-0.858579
Hsd17b2	-0.435666	-0.858337
Psd4	0.226386	-0.858334
Mtpn	0.035577	-0.85794
Sae1	-1.55759	-0.857939
Cbx3	0.576977	-0.857854
Arpc2	0.975597	-0.857798
Bcas2	0.12436	-0.857373
Ppib	0.160791	-0.857068
Ctsd	-0.92744	-0.856151
C1qb	-0.599589	-0.856028
Rab14	0.194718	-0.855668
Phf13	-0.326189	-0.855595
Reps2	-0.225965	-0.854215
Stk17b	-0.104652	-0.854068
Tfam	-0.257128	-0.853903
Ptges3	0.818031	-0.853875
Rpl7a	0.383614	-0.853873
Lrsam1	-1.13844	-0.853681
Capza2	0.278004	-0.853259
Gatb	0.219927	-0.852774
Nxpe2	-0.340265	-0.852543
Tmem60	-0.014729	-0.852536
Hsdl2	0.805936	-0.852371
Siah1b	-5.34505	-0.851668
Prkaa2	-0.294633	-0.850834
Tmem208	-0.239356	-0.850607
Rplp1	-0.459067	-0.850541
Ccny	-0.556796	-0.850337
Ube2a	0.223159	-0.850194
Ankrd50	-1.82337	-0.849675
Oat	0.630931	-0.849364
Tmem18	0.238467	-0.849239
Thap1	0.558637	-0.848886
Shtn1	0.0275358	-0.848765
Rps3	-0.46323	-0.848686
Yju2	-5.59636	-0.848268
Aldh1a7	0.0986935	-0.848035
Igfbp2	-0.739119	-0.847926
Ddias	-0.432258	-0.847868
Elavl1	-0.0580977	-0.846707
Chchd4	1.50341	-0.846677
Rabif	-1.26488	-0.846408
Nmi	0.481541	-0.846177
Rgn	0.630837	-0.845941
Ctso	-1.23217	-0.845925
Ptpre	-5.03119	-0.845824
Fzd6	-2.38905	-0.845821
Sdc1	-0.172001	-0.845811
Laptm4b	-0.142859	-0.845595
Ift27	0.301112	-0.845217
Efemp1	0.2287	-0.844615
Derl1	-0.729394	-0.84456
Tubb5	-0.493616	-0.84316
Otulin	-0.411742	-0.843146
Zadh2	-0.871047	-0.842217
Pdia3	-0.153103	-0.842203
Ms4a6c	0.379825	-0.842134
Gars	0.815282	-0.841571
Tgds	-0.192784	-0.840515
Ttc27	1.20359	-0.840278
2900097C17Rik	-0.473666	-0.839894
Naa50	0.707944	-0.839821
Eif3i	-0.531359	-0.8394
Sh3bgrl	-0.513975	-0.838966
Snx27	-1.07477	-0.837682
Laptm5	-0.147127	-0.837545
Uchl5	0.808062	-0.837484
Ttll12	-0.723481	-0.837448
Slc40a1	-0.0711236	-0.837423
Cfdp1	-0.505272	-0.836102
Pdgfd	-5.39576	-0.835341
E130311K13Rik	-2.55552	-0.834946
Ube2n	-0.930638	-0.8349
Rpl13	0.190098	-0.834141
Unc119b	-1.35122	-0.834073
Ccr5	-2.69082	-0.834031
Slc7a8	-6.18831	-0.833903
St6galnac6	-1.31264	-0.83336
Zfp930	-5.71323	-0.833283
Pygb	-1.21484	-0.832915
Zfp655	0.104228	-0.831816
Bbs1	0.651189	-0.83111
Lcorl	0.0603375	-0.830987
Lect2	0.700171	-0.83084
Ccdc32	-1.81134	-0.830364
Nudt8	-0.0904155	-0.829902
Cib2	0.137847	-0.829674
Csrp3	0.843349	-0.829505
Tmem35b	-5.76229	-0.829411
N6amt1	0.539386	-0.829348
Acp1	-0.242186	-0.828488
Mrpl42	0.114998	-0.828128
Smim27	1.73706	-0.827942
Tmem220	0.498861	-0.8276
Mrps2	-0.36366	-0.827385
Pcca	0.989591	-0.826483
Lactb	0.617914	-0.825324
Commd10	-2.73943	-0.824789
Rab21	-0.797421	-0.82437
Serpina1d	-0.634011	-0.824291
Aqp9	-0.254117	-0.824105
Tmem59	-0.262582	-0.823763
Tspan3	-0.975164	-0.823742
Ppa1	0.46025	-0.823735
Slc22a15	-1.78013	-0.823734
Taf6l	-4.92141	-0.823694
D830050J10Rik	-4.99085	-0.823494
Pde7b	0.175422	-0.823386
Nt5e	-1.9999	-0.823239
Atg12	0.610028	-0.823164
Calm3	-0.236378	-0.822668
Casp6	0.0726677	-0.822369
Pcmt1	-0.251545	-0.821787
Gm2a	-0.556188	-0.821216
Mrpl12	-0.00629842	-0.821056
C3ar1	0.433164	-0.820874
D030056L22Rik	0.992499	-0.820763
Gnai3	0.03848	-0.820416
2010320M18Rik	-0.538925	-0.820168
Crbn	0.0215219	-0.81958
Mfsd1	-0.766895	-0.819523
Lipa	-0.561401	-0.819414
Rnase4	-0.00420639	-0.818277
Taf9	1.06924	-0.818151
Zap70	0.423619	-0.818002
Prep	0.507804	-0.817731
Mrc1	0.238989	-0.817382
Pafah1b1	0.533063	-0.816957
Trim23	0.547967	-0.816832
Akr1c19	0.98387	-0.816751
Tbc1d7	0.0469896	-0.81606
F2	-0.709248	-0.815952
Rps29	-0.166472	-0.815869
F2r	-0.757025	-0.815834
Gstm2	0.320172	-0.815356
1810037I17Rik	1.79773	-0.815347
Nol7	0.529664	-0.815161
Gstm3	-1.59048	-0.814977
Rnf4	0.371616	-0.813767
Ndufs5	0.59231	-0.813663
Rtcb	0.131343	-0.813576
Nudcd2	0.262108	-0.813395
Fads1	-0.0428962	-0.813358
Rps12	-0.552844	-0.813061
Zc3h6	-1.35146	-0.812982
Rab6a	0.436511	-0.812468
Tmem167	0.466347	-0.812361
Serpina1a	0.19744	-0.811245
Sh3bgrl2	0.514186	-0.810662
Cd300c2	0.0801459	-0.809662
Epb41l4b	-0.619357	-0.809466
Hsd17b6	-0.335566	-0.809445
Rpn1	-0.421711	-0.808209
Tmem80	-0.560957	-0.808155
Clint1	0.134614	-0.807971
Adcyap1r1	-0.636142	-0.807782
Glce	-1.28923	-0.807399
Rnf146	0.560668	-0.807252
Thap12	-0.649973	-0.807191
5730455P16Rik	-0.0956545	-0.806484
Ier3ip1	0.415942	-0.80619
Ranbp1	-0.731925	-0.806137
Cst3	0.0204496	-0.80603
Gatd3a	-0.147829	-0.805375
Tnfsfm13	-1.01804	-0.804168
9930111J21Rik1	1.01056	-0.80348
Mpdz	-0.659188	-0.803237
Ufm1	-0.126077	-0.80278
Evl	0.935085	-0.802518
Mrps28	1.80494	-0.801863
Acss2	-0.408899	-0.801306
Lbr	-0.723671	-0.801079
Zfp980	-0.94293	-0.801076
Rps5	0.196994	-0.79998
Eif1	0.412402	-0.799938
Commd5	-0.145166	-0.799469
Rpa3	2.12057	-0.799212
Ddx3x	0.530422	-0.798561
Dhfr	-0.34804	-0.798246
A430078G23Rik	-2.2597	-0.797964
Mpp6	0.626733	-0.797502
Ppm1f	0.181934	-0.795794
Mrpl33	-0.182127	-0.795394
Zfp874a	-0.951769	-0.7949
Tm2d2	-0.546639	-0.794722
Pts	-1.17212	-0.794178
4930413G21Rik	-5.24868	-0.793995
Atp6v1h	0.739206	-0.793752
Hnrnph2	0.407692	-0.793322
Cstf2t	-1.02891	-0.792947
Mup19	-0.168166	-0.792332
Srsf10	0.864196	-0.792007
Ppm1h	-5.5183	-0.792006
Mtmr2	-0.459746	-0.790171
Ube2q2	-0.396828	-0.789333
Prss23	-1.10119	-0.789167
Zfp872	2.09139	-0.789059
Churc1	0.567731	-0.788667
Yae1d1	0.522506	-0.788419
Slc35a1	-0.743489	-0.788318
H3f3b	-0.584831	-0.788256
Wdr44	0.117643	-0.788108
Lactb2	0.575857	-0.787942
Kat2b	-0.000512591	-0.787556
Gsta4	0.266784	-0.787278
Als2	-0.221608	-0.787275
Dnajc15	-0.275444	-0.786187
Psmb8	-0.546178	-0.786015
Rrm2b	-5.05722	-0.785411
Rps27l	0.509019	-0.785342
Tmem176b	-0.321254	-0.785169
Cxcl9	0.162946	-0.78485
Kctd9	0.0211269	-0.784794
Rbl1	-1.07177	-0.784302
1110032A03Rik	-0.724872	-0.784054
Sesn3	-0.0569642	-0.783939
Nox4	0.0962341	-0.783878
Gbp2b	1.39384	-0.783785
Gtf2e1	0.250489	-0.783598
Dhx32	-0.0877956	-0.783525
Rac1	0.259206	-0.783153
Mex3c	-0.836851	-0.783086
Mup3	0.979389	-0.782656
Pex3	0.258245	-0.782137
Wipf1	0.678718	-0.78191
Glul	0.0567256	-0.781568
Psmg3	-0.818863	-0.781258
Snu13	-0.25013	-0.781193
Rplp0	0.659081	-0.781162
Apon	-0.773431	-0.78116
Sparc	-0.762802	-0.78109
Mrpl27	0.214578	-0.780693
2900052L18Rik	-4.54734	-0.780192
Plcxd2	-0.531599	-0.78012
Clec2h	-5.19506	-0.779811
Zmat1	0.53325	-0.779591
Vps4b	0.122187	-0.779237
Smad5	-0.0023457	-0.779214
Oma1	0.899914	-0.778887
Rnf14	-0.871562	-0.778857
Tm7sf3	-1.01576	-0.77871
BC029722	-1.57874	-0.778475
Olfml1	-0.22212	-0.77846
Zbtb7c	-5.21757	-0.778027
Sqstm1	-0.415086	-0.777982
Trps1	-4.74329	-0.777671
Rpa2	0.284852	-0.777597
Lipc	-0.300276	-0.776931
Rps16	-0.187079	-0.776904
Ybx1	0.507043	-0.776702
Srp9	-0.0399168	-0.776513
Ccdc12	-1.22264	-0.775997
Ttf2	-6.16238	-0.775102
Rpl23a	-0.345142	-0.774455
Hmox2	-0.417678	-0.774326
Cpne3	0.32752	-0.774053
Ebp	-0.394043	-0.77365
Rnf114	-0.59014	-0.773646
Cd274	-0.67733	-0.773258
Pcbd1	-0.297409	-0.772575
Zfand1	-1.51127	-0.772559
Rbm3	1.08676	-0.77248
Rap1b	0.93402	-0.772372
Aadac	-0.688444	-0.772246
Fermt2	-0.130183	-0.771843
Daglb	-1.0384	-0.771809
Mrpl40	-0.749894	-0.771752
Gm7694	-1.11698	-0.771505
2610001J05Rik	0.65475	-0.770261
Abat	-0.108672	-0.769759
Psmb2	0.623028	-0.769636
Arpc1b	-0.321412	-0.769601
Brix1	0.805859	-0.769502
Stat1	0.36583	-0.769334
Scd2	-2.75175	-0.768837
Fras1	-0.769452	-0.768824
Canx	0.0345618	-0.768245
Anp32a	0.345921	-0.768102
Pdcd10	1.04451	-0.768099
Ykt6	-0.735387	-0.768011
Bmp5	-2.05901	-0.767972
Ppp2r5c	-0.418506	-0.767947
Atl3	-0.90456	-0.767916
St3gal2	-5.2312	-0.767891
Znrf2	-0.146232	-0.767386
Lifr	-0.0212304	-0.767191
Kifc3	-1.11102	-0.766794
Nfkbie	-1.50177	-0.766639
Ctnnb1	0.282155	-0.766449
Ttc14	-1.16613	-0.766398
Prkd3	-0.106719	-0.766359
Mtx2	0.217803	-0.766233
Tmbim4	-0.224842	-0.765917
Prdx5	-0.0734026	-0.765861
Cat	0.198576	-0.765709
Manf	0.771512	-0.765644
E230013L22Rik	-5.06963	-0.765384
Rsbn1l	-0.818572	-0.765378
Anxa2	0.301324	-0.764573
Fam110a	-1.60231	-0.764551
Cmc1	1.38383	-0.764388
Txndc16	0.392656	-0.764232
Slc16a2	-0.727349	-0.763916
Rab18	0.65126	-0.763634
Zwint	0.378664	-0.763157
Hist1h2bq	-0.164137	-0.762309
Dio1	-0.760339	-0.761947
Glud1	-0.00202367	-0.761746
Sh3bp2	-1.85833	-0.761611
Trim30d	0.488061	-0.761412
Fahd1	0.0690315	-0.760825
Lilra5	-0.0231347	-0.760709
Alkbh7	-0.979665	-0.760463
Vat1	-0.569674	-0.76026
Ppp2cb	-0.119014	-0.760162
Mrpl50	-0.811893	-0.75978
Stx12	-0.357802	-0.759593
Tmed10	-0.935607	-0.759547
Mrpl28	-0.333147	-0.759528
Slc10a5	-0.600605	-0.757729
Itpk1	-1.11678	-0.756963
LOC102640673	-3.97011	-0.75689
Kcnn1	-1.6623	-0.756738
Snx24	-0.152798	-0.755386
Ankrd28	0.935409	-0.755347
Etv5	-5.91927	-0.75531
S1pr5	-5.61024	-0.755068
Gipc1	-0.33535	-0.754653
Ywhaq	0.152646	-0.75465
Ift81	-1.11547	-0.754643
Ces1c	0.210963	-0.754273
Med9	-1.21543	-0.753386
H2-T22	-0.439694	-0.753301
Mrpl9	-1.02369	-0.752753
Fam219a	-0.352285	-0.752514
Tlr3	0.983142	-0.75188
Maip1	0.905003	-0.751699
Lap3	0.206602	-0.751504
Slc16a11	-2.78894	-0.751426
Cox16	0.947773	-0.751332
Taf5	0.759873	-0.750442
Mrps34	0.657176	-0.750432
Ech1	0.160321	-0.750269
Hint3	-0.365338	-0.750241
Serpina10	0.160561	-0.749452
Ddost	-0.602083	-0.749258
Chmp6	-2.20755	-0.748569
Rpl22	-0.570666	-0.748466
Apopt1	-0.171988	-0.747721
Zfp943	-0.00887676	-0.746955
Pgrmc1	0.694348	-0.746841
Dnase1l3	-0.431295	-0.746822
Sil1	-0.086377	-0.74681
Csgalnact2	-1.00222	-0.746023
Gpam	-0.440916	-0.745879
Tmem30a	-0.284522	-0.745739
Stbd1	0.449115	-0.745654
Gstk1	0.52628	-0.745627
Pcbp1	0.382347	-0.745551
Rnft1	-0.725197	-0.745135
Eri1	0.94747	-0.745135
Atp6v0e	-0.243383	-0.744253
Pla2g12a	-0.0659432	-0.743259
Dnajc9	0.988645	-0.743231
Arhgdib	-0.181437	-0.742978
App	-0.855769	-0.742892
3830406C13Rik	0.269167	-0.742675
4930480K23Rik	-0.571687	-0.742565
Pdss2	-0.0661372	-0.742488
Eif3f	0.583571	-0.74244
Nr2c1	-0.341756	-0.742019
Rfc5	-0.0110732	-0.741833
Nme2	0.6247	-0.741645
1110059E24Rik	1.3191	-0.741609
Copb1	0.336698	-0.741504
Rab30	-1.14187	-0.741393
Mtch1	-1.14138	-0.741135
Etfrf1	0.824715	-0.741099
Fam53c	-1.17757	-0.740589
Higd2a	-0.236094	-0.740554
Med18	0.679696	-0.74017
Tmtc3	0.150045	-0.740088
Cav1	-1.81535	-0.739957
Dusp19	-1.89878	-0.739313
Armcx5	-4.6511	-0.739103
44450	-0.713712	-0.739101
Ppp1ca	-0.107463	-0.738931
Slc31a1	0.117821	-0.738428
Brip1os	-0.406916	-0.738361
Ccn4	0.112453	-0.737817
Rprd1b	0.261228	-0.737335
Lsm14a	-0.226278	-0.73689
Pttg1ip	-0.656201	-0.736686
Rbm41	1.97174	-0.736368
Lamtor2	0.143201	-0.736094
4930412C18Rik	-3.89041	-0.736087
Akr7a5	-0.00590495	-0.735989
Seh1l	-1.15555	-0.735791
Rfc1	0.703391	-0.735577
Col14a1	-0.873645	-0.735559
Agtrap	-1.85484	-0.73526
Ntn1	-0.164956	-0.735084
Snx6	0.963613	-0.734684
Igfbp7	-0.509312	-0.734583
Rmdn1	-0.345635	-0.734329
Mup12	1.01906	-0.733967
Tm9sf3	-0.705906	-0.733644
Galm	0.026044	-0.733448
Prxl2c	-1.00379	-0.733436
Mettl7a1	0.535738	-0.73343
Cept1	0.166954	-0.733289
Spred1	0.457719	-0.731817
Chmp4b	-0.373778	-0.731809
Cox4i1	-0.208091	-0.731656
Slc18b1	-1.7768	-0.731538
Ahsg	-0.792924	-0.731471
Zfp942	0.473402	-0.731373
Mrpl36	0.0951658	-0.730796
Shmt1	0.659064	-0.730386
Smoc2	0.802067	-0.730325
Hsd17b11	-0.346369	-0.730141
Adora1	-0.494508	-0.730052
Nsmce4a	-0.407426	-0.729941
Tmem167b	-0.688771	-0.729892
Zfp62	0.489445	-0.72951
Cnbp	0.236539	-0.729287
Ptgr2	0.198739	-0.729099
Sec22b	-0.619474	-0.728734
Dcdc2a	0.707455	-0.728713
Rcbtb1	-0.0379361	-0.728686
Hist1h2be	-1.05687	-0.728657
Cd99l2	0.197753	-0.728142
Arglu1	0.194701	-0.728103
Asgr2	-0.0542	-0.727823
Fgl2	-5.23834	-0.727776
Med8	-0.156863	-0.727712
Ttpa	-0.0184423	-0.727307
Fen1	-5.2766	-0.727285
Rhoq	-0.645881	-0.727232
Trmt2b	-0.455873	-0.727136
Ccnc	-0.168658	-0.726752
Rpl12	0.972658	-0.72664
Erlin1	-0.570739	-0.726241
Colec10	0.462539	-0.725868
Oip5os1	0.0221359	-0.725515
B3galnt2	-0.780186	-0.725415
Immp2l	0.237149	-0.725295
Eif3h	0.637313	-0.725092
Tpd52l1	1.20139	-0.725088
Pbrm1	0.263202	-0.724449
Rpl34	0.357941	-0.724387
Sparcl1	-1.31851	-0.724252
Tsfm	0.98508	-0.723937
H2-Ab1	-0.774166	-0.723672
Tgoln1	-0.596478	-0.723435
Epb41l1	-5.63964	-0.723411
Snrnp35	1.10108	-0.722391
Dnajc19	-1.1232	-0.721701
Parp12	-0.601817	-0.721549
Aimp1	1.16048	-0.721422
Tmem135	-0.0750506	-0.721281
Tor4a	0.549307	-0.721232
Prnp	-0.480772	-0.720667
Hmox1	0.0537769	-0.7206
Itpripl1	-0.774237	-0.720157
Dhrs7b	0.549624	-0.719358
Tnfsf10	-1.93709	-0.719158
Mrpl16	0.382626	-0.718913
Akr1e1	-1.02956	-0.71865
Fmr1	-0.000592183	-0.718612
Coa7	1.25097	-0.718418
Apoo	1.22941	-0.717681
Lsm1	0.631261	-0.717539
Vti1a	-0.210237	-0.717497
Rab5b	0.0533381	-0.717326
Pllp	-1.3677	-0.71652
Stxbp4	-1.55838	-0.716222
Btf3l4	0.620789	-0.715952
Psmd11	-0.0382157	-0.715848
Ssr3	-0.172971	-0.715715
Pam	-0.779058	-0.715649
Polr3h	-1.17055	-0.715497
Lgals9	-0.148191	-0.715496
Litaf	-0.575409	-0.71464
Ankrd49	-0.154279	-0.714077
Zfp160	-2.13623	-0.714033
Commd2	-0.599273	-0.71399
Tmem42	0.213828	-0.71396
Cth	0.635555	-0.713889
Chac2	0.662217	-0.713625
Anxa3	1.66721	-0.713603
Tpt1	0.255798	-0.7133
Rpl11	-0.211636	-0.713243
Mtln	0.506707	-0.712907
Scd1	-0.465087	-0.712901
Map3k2	-0.163882	-0.712855
Lin7a	0.234055	-0.712442
Tmem159	-3.78738	-0.712369
Tuft1	1.48619	-0.712254
Gstm5	1.09228	-0.7116
Aldh5a1	-0.737467	-0.711358
5730409E04Rik	-0.0461348	-0.710734
Rbm7	0.263493	-0.710235
F830016B08Rik	0.294724	-0.709952
Emc2	0.309358	-0.709568
Sat2	1.77364	-0.709559
Capza1	0.245842	-0.709484
Cd82	-0.462353	-0.709303
Mmp19	-0.356	-0.708651
Bche	-0.0778276	-0.708407
Ugt2b38	-0.0512703	-0.708332
Snap23	0.299684	-0.708278
Ssr4	0.68098	-0.708202
Ubl3	-0.365761	-0.70743
Teddm1b	-5.29957	-0.707306
Nsmce3	-1.1061	-0.707048
Cds2	-0.517074	-0.706951
Rap1a	0.92093	-0.706563
Mrps30	0.416349	-0.706546
Ifi209	-3.93056	-0.70633
Snapc1	-0.067995	-0.705889
Serpinf1	-0.479041	-0.705459
Atad1	-0.954371	-0.705304
Exosc7	0.4818	-0.704988
Serpinb6a	0.198933	-0.704719
Insig1	-0.918125	-0.704291
Cd151	-1.06856	-0.704177
Ints10	1.17404	-0.704163
Arrdc3	-0.497825	-0.70359
44257	-1.11337	-0.703249
44257	0.375925	-0.703249
Gm4788	-0.145072	-0.703249
Slc35d1	-0.837456	-0.703195
Igtp	-0.270137	-0.702878
Cmbl	0.0251171	-0.70274
Tmem53	-0.472193	-0.701999
Osgepl1	0.992213	-0.70095
Cpox	-0.164643	-0.700472
Apoh	-0.686479	-0.700267
Gsto1	-0.243527	-0.700141
Pdcd6	0.62301	-0.699949
Hsbp1	0.597785	-0.699913
Rpap3	1.29995	-0.699847
Ipp	0.453362	-0.699842
Rnf187	0.247327	-0.699467
Slc39a3	-1.3364	-0.699402
Zfp961	-5.44621	-0.699207
Eif1a	0.0988148	-0.698771
Coq7	0.63507	-0.698746
Kdm1b	0.359495	-0.698616
Rfc4	-1.12999	-0.698543
Arl3	2.2243	-0.698506
Rac2	0.487942	-0.697201
Rps27a	0.697909	-0.697018
Tnfaip8l2	0.520561	-0.696313
2010315B03Rik	-1.60993	-0.696045
Abhd5	-0.627883	-0.69528
Cyb5d1	-0.417197	-0.69436
Wdyhv1	0.0631496	-0.694127
Cops5	0.722466	-0.693883
Hnrnpa3	0.379662	-0.693768
Ccdc167	-1.80327	-0.69369
1110065P20Rik	-0.683594	-0.693532
Trmt12	-5.03741	-0.693326
Yipf6	-1.02924	-0.693307
Vta1	-0.790988	-0.692485
Exoc4	-0.227695	-0.69233
Tenm3	-0.152737	-0.692244
Il1rap	0.0415276	-0.691782
Gpalpp1	-0.455056	-0.6914
Got2	-0.167478	-0.691194
Tbc1d12	-0.707976	-0.690809
Pla2g7	-0.18907	-0.690621
Eif4h	0.518684	-0.690431
Magee1	-1.75514	-0.69026
Cyb561	-0.562066	-0.690154
Crls1	-0.405821	-0.68992
Dhrs1	0.360465	-0.689834
Srprb	0.103254	-0.689657
Atg4c	-0.840024	-0.689563
Aig1	0.711287	-0.689411
Herpud2	-1.17633	-0.689259
C2cd2	-0.871346	-0.689189
Med28	-1.40192	-0.688728
Bcap29	0.686564	-0.688679
Enho	-1.53085	-0.688478
Ipo8	0.500045	-0.688328
Cxcl12	-0.793003	-0.687726
Htra1	-1.44678	-0.687598
Acadsb	0.212451	-0.687575
Kras	-0.498789	-0.687386
Atxn7l1	0.0556733	-0.687234
Sec13	0.876837	-0.68699
Tfrc	-0.24595	-0.686958
Hsp90b1	-0.0458487	-0.686536
Nab1	-0.141291	-0.68615
Vapb	-0.115234	-0.685795
Rps26	-0.626804	-0.685571
Ifit2	-2.15307	-0.685384
Ap1s1	-1.64869	-0.685328
C1qbp	0.917236	-0.685018
Mrps24	0.290644	-0.68483
Bgn	-0.573831	-0.684746
Saa2	0.266442	-0.684471
Mtfp1	-0.616426	-0.684169
Acbd4	0.0985901	-0.683839
Tbcb	0.280494	-0.683633
Rfesd	-0.237954	-0.683132
Cog7	0.76289	-0.682912
Nup35	0.787824	-0.682784
Gm15506	-5.834	-0.682775
Gm7030	-5.49985	-0.682774
Gtf2ird1	0.0781871	-0.682682
Coasy	0.596398	-0.682204
Spcs2	-0.866641	-0.68192
Dhx9	0.827076	-0.681529
Gtf3c4	-0.409347	-0.68125
Sumo2	0.617683	-0.681162
Dennd6a	0.128907	-0.681109
Islr	-5.2491	-0.681006
Cdc26	0.110486	-0.680865
Ugt2b5	0.174687	-0.680719
Arpc5	0.193276	-0.680634
Ces3b	-0.226698	-0.679986
Rarres2	0.150047	-0.679844
Tgm4	-0.893115	-0.679739
Cse1l	0.541859	-0.679614
Fgfr3	-1.14969	-0.679236
Fam3c	-0.556213	-0.678835
Cacul1	-0.705861	-0.678156
Eme2	-1.01579	-0.678091
Ormdl3	0.0470638	-0.678068
Mcrip1	0.370486	-0.67803
Trim34a	-0.303841	-0.677453
Rps6	0.606671	-0.677307
Idh2	0.755042	-0.676938
Eif2ak2	-0.818709	-0.676892
Sigirr	-1.13486	-0.676844
Dzip3	0.161872	-0.675665
Fuom	1.54146	-0.675314
Rit1	-1.83511	-0.675098
Resf1	-1.45388	-0.675066
Casp9	-1.22891	-0.674241
Eps15	-0.267733	-0.67385
Gnpnat1	0.501103	-0.673351
Stim1	0.137355	-0.673333
Cib1	-0.0375927	-0.673031
Pknox1	-0.12214	-0.672949
Dstn	0.741348	-0.672788
Tmem198b	1.36125	-0.672733
Tmed4	-0.410949	-0.671522
Nifk	-0.937079	-0.670938
Rnaset2a	-0.815584	-0.670798
Qk	-0.195399	-0.670704
Snap29	0.3894	-0.670047
Zswim7	-0.262448	-0.669943
Pdcd2	0.446508	-0.669639
Hadhb	0.168175	-0.669596
Swi5	0.99561	-0.66924
Ppp3r1	0.556541	-0.669187
Usp45	0.376689	-0.669111
Ube2d2a	0.535756	-0.668864
Iars	0.639384	-0.668573
Cox6c	0.234282	-0.668545
Prps2	0.185347	-0.668123
Paox	-1.1008	-0.667601
Sec22c	-1.62053	-0.667441
Enox2	-0.192981	-0.666927
Cs	0.545963	-0.6667
Vnn1	-0.0284138	-0.66653
Dld	0.975645	-0.666364
Ankrd44	0.17348	-0.665731
Tbcc	1.43	-0.665043
Neto2	-4.9419	-0.664786
Cisd2	-0.312717	-0.664639
Cebpg	0.167001	-0.664457
Pnldc1	-5.19877	-0.664013
Ormdl2	-0.55193	-0.663958
Itfg1	-0.416476	-0.663692
Rpl37a	0.462341	-0.663218
Nid1	-0.0140406	-0.662988
Gng11	-0.563362	-0.662606
Pklr	0.0806941	-0.662416
Rasa2	-2.02686	-0.662176
Nme7	-2.84824	-0.66175
Micu2	0.947236	-0.661476
Galnt10	-0.0333866	-0.661365
Map4	-0.620921	-0.661152
Leo1	0.466321	-0.661138
Rap2c	-1.18578	-0.6611
Rpl32	0.033624	-0.660931
Eef2	-0.46424	-0.660521
Ajuba	-2.23573	-0.66001
Mtg1	0.523681	-0.659899
Akap5	-1.5022	-0.659897
Colec11	-0.831125	-0.65965
Psmd12	0.539346	-0.65931
Prdx2	0.580456	-0.658543
Srpx2	-5.01902	-0.658454
Appl1	-0.189118	-0.658355
Mlst8	-0.391819	-0.657915
Smo	-0.536244	-0.65781
Pafah1b3	-0.680713	-0.657807
Psmd3	-0.281406	-0.657779
Rps17	-0.729045	-0.657472
Krt8	-0.00258341	-0.657276
Pctp	0.0814894	-0.656911
Raet1e	-2.10526	-0.656713
Mapkapk3	-5.43879	-0.65653
Snrpf	0.0355588	-0.656358
Atp1b3	-0.0907849	-0.656021
Atp5j2	0.30017	-0.655723
Heatr3	0.775618	-0.655547
Gskip	-2.2321	-0.655525
Il10ra	-0.188377	-0.655229
Ctdspl2	-0.783995	-0.655093
Tmem86a	1.33408	-0.654773
Tc2n	-0.208471	-0.654753
Hadh	0.206912	-0.654232
Zfp608	-5.63964	-0.654151
Slc16a9	-0.0913277	-0.654007
Abraxas2	-0.207519	-0.65319
Lipt1	0.513855	-0.652895
Ppm1b	-0.41593	-0.651773
Fam185a	-1.11695	-0.651464
Gng5	0.0971149	-0.651277
Usp6nl	-1.3271	-0.650167
Dnajc3	-0.0642455	-0.649804
Fmo4	0.920266	-0.649719
Rps11	0.670349	-0.649538
Surf4	-0.490917	-0.649328
Mdh2	0.52739	-0.649235
Ggact	-0.267155	-0.648793
Cd44	0.379138	-0.648468
Ahcyl2	0.131567	-0.648364
Cnot9	-0.65667	-0.648121
Crebl2	0.692508	-0.647809
Ppcs	1.2386	-0.64769
Pygl	0.0042521	-0.647575
Naca	0.315756	-0.647446
Clu	-0.643517	-0.647146
Wdr20	-0.677707	-0.647078
Rab5c	-0.612799	-0.646877
Jmjd4	-0.0371564	-0.646589
Prelp	-1.08807	-0.646578
Psma7	0.526678	-0.646509
Gjb2	-0.903331	-0.646319
Itpa	0.195761	-0.646302
Fam8a1	-1.15482	-0.645507
Sco1	-0.552322	-0.645173
Suclg2	0.335312	-0.645155
Mrpl30	0.840312	-0.64499
Pdzk1	0.818405	-0.64441
Asgr1	0.618013	-0.644398
Ndufa9	0.811182	-0.644152
Mmp15	-0.920179	-0.643973
Amdhd1	-0.274584	-0.643252
Pex7	0.70874	-0.64323
Abca8b	-0.816904	-0.643174
Apex1	0.810471	-0.642879
Tsnax	0.389068	-0.642551
Rab34	1.52335	-0.642345
Slc25a46	-0.00708754	-0.642074
Rpl10	0.470165	-0.641863
Nptn	-0.195834	-0.641723
Ostm1	0.200483	-0.641658
Coro1c	-0.491691	-0.641633
Gjb1	-0.92311	-0.641493
Acbd5	0.353075	-0.641312
Ramac	-1.56583	-0.640553
Kbtbd7	-0.0266134	-0.640282
Timm8b	-0.182798	-0.640045
Tuba4a	-0.455213	-0.639493
Lin9	-1.01429	-0.639386
Magix	0.379252	-0.639036
Plpp6	-0.280672	-0.638
Serinc1	-0.588254	-0.63773
Gbp9	-2.0362	-0.637721
Zfand3	-0.993144	-0.637634
Tmem126a	1.36081	-0.637396
Timm50	0.679439	-0.637185
Nars	0.965018	-0.636908
Eif1b	0.585608	-0.636738
Arl8b	-0.617985	-0.63661
Tob1	-0.44027	-0.636449
Larp4	0.440185	-0.63623
Ang	-0.495531	-0.636114
Bbip1	0.783628	-0.636055
44261	-0.341842	-0.636018
Ccdc91	0.469592	-0.635179
Fpgt	0.248589	-0.634393
Abca3	-1.10151	-0.634245
Rack1	0.275681	-0.634145
Tmbim6	-0.713265	-0.634104
Tomm20	0.201878	-0.633965
Brms1l	0.933754	-0.633773
Zbtb41	-1.15023	-0.633208
Atp6v1b2	-0.0743797	-0.631765
Thnsl1	-1.58895	-0.631632
Oaz2	-0.010549	-0.63134
Lysmd3	0.388645	-0.631233
Eif4g2	-0.898154	-0.630349
Slc13a3	-0.664039	-0.630142
Vps45	1.4076	-0.629918
Cbwd1	-1.40983	-0.629328
Ap1ar	-0.628588	-0.629291
Pex11g	-0.504088	-0.628483
Rabl3	0.274269	-0.628418
Tada1	-0.0883013	-0.628224
Cyp2c68	-0.294817	-0.627869
Chsy1	1.54377	-0.62744
Tpk1	0.695491	-0.627157
Itgb1	-0.248159	-0.62687
Id4	-0.389743	-0.626833
Bend7	-0.78107	-0.626786
Gpd1	0.071734	-0.626553
Rnaseh2c	-0.00124062	-0.626472
Arhgap26	-1.3864	-0.626287
Sox9	-0.603345	-0.62522
Mrrf	-1.49064	-0.625069
Pold2	0.613847	-0.624911
Eif5a	0.767144	-0.624894
H2-T23	-1.03663	-0.624882
Insc	-1.56572	-0.624793
Arl6ip1	-0.277948	-0.624487
Kdsr	-0.862462	-0.624416
Dapk2	-1.05731	-0.623921
Akr1a1	0.36596	-0.623217
Thumpd1	-0.435835	-0.623054
Sf3b5	-1.58402	-0.622891
Nt5c3	-0.21274	-0.622772
Rbm47	0.435934	-0.622761
Siglec1	-1.14259	-0.622663
Pacrgl	-5.35936	-0.622659
Ruvbl1	0.545557	-0.622547
1110004F10Rik	0.592948	-0.621805
Rcbtb2	0.513984	-0.621412
Uvssa	-1.06597	-0.62138
Necap1	0.657969	-0.621203
2810021J22Rik	2.99107	-0.62105
Sap18	-0.635859	-0.620992
Fcgr3	-5.36908	-0.620941
Tmem106b	-0.193455	-0.620751
Zfp758	-0.6615	-0.62071
Gpd2	0.843562	-0.620442
Ccdc47	0.168731	-0.620421
Zranb2	0.542969	-0.61998
Otud6b	0.617654	-0.61986
Pex2	0.133493	-0.619708
Tspan18	-1.52335	-0.61969
Aqp1	-0.602814	-0.619668
Zfp637	-2.88523	-0.619592
Sdhaf2	0.686096	-0.619439
Enpep	0.0857961	-0.61937
Abtb2	0.130106	-0.619289
Lpgat1	-0.68584	-0.619188
Slc37a1	-1.55306	-0.618973
Nid2	-0.495739	-0.618518
Gulo	-0.565037	-0.618456
1700001L05Rik	-0.333825	-0.618006
Mcfd2	-0.447776	-0.617911
G3bp2	-0.789815	-0.617286
H2-Q1	-0.55922	-0.617006
Atp11c	-0.34296	-0.616155
Slc2a8	-1.10182	-0.615904
Ppip5k1	-6.0501	-0.615831
Mcm4	-0.808242	-0.615737
Smpd3	-1.01294	-0.615727
Tbc1d8b	0.146589	-0.615659
Psmd8	-0.603931	-0.615508
Dynlt1f	1.03951	-0.615417
Prlr	-0.437707	-0.615156
Cep76	-0.100195	-0.615063
Cadm3	-0.512592	-0.615032
Clec4a3	-0.511257	-0.615011
Cetn2	0.926413	-0.614645
Pzp	-0.49223	-0.614375
Mfsd5	-0.766413	-0.61382
Itih1	-0.643612	-0.613672
Zfp873	-5.57874	-0.613268
Akap10	-1.12951	-0.613225
Morc4	1.21705	-0.612856
Fbxo8	-0.52832	-0.612842
Csad	0.207318	-0.612661
Serpinc1	-0.746432	-0.612625
Arl14ep	0.575304	-0.612549
Atp6v1c1	0.67932	-0.612535
Kif3b	0.131748	-0.612446
Mest	-0.601587	-0.612418
Chrac1	-2.47502	-0.612257
Pigk	-0.22874	-0.611894
Spryd4	-1.08132	-0.611475
Wdr25	1.52934	-0.611107
Sdc2	0.0725471	-0.610844
Gm10336	0.538282	-0.610641
Arhgap6	0.427008	-0.610609
Slc2a5	0.64637	-0.610599
Mthfsl	0.279927	-0.609888
Tmem14a	-1.58072	-0.609837
Cycs	0.634235	-0.609579
Adgrg6	-1.21485	-0.609573
Camkk2	-0.679791	-0.609361
Dbndd2	1.02526	-0.609359
Klhl8	-1.71617	-0.609287
Papln	0.777459	-0.609064
Ddx17	-0.765325	-0.609058
P2ry12	-0.662558	-0.608615
Cct7	0.0480367	-0.608023
Lgr5	-0.257094	-0.60801
Micos10	-0.14096	-0.607651
Nipal3	-0.728627	-0.606933
Akip1	0.985375	-0.606583
Ccng2	1.23088	-0.606421
Set	0.768278	-0.605361
Tnfrsf1a	-0.697773	-0.605312
Trpt1	-5.57905	-0.605265
Zeb2	-1.03063	-0.605131
Rps10	-0.685554	-0.605124
Alg6	-0.121705	-0.604994
Cavin2	0.2073	-0.603867
Tbc1d32	0.400203	-0.603827
Mpv17l	0.582527	-0.60335
Nuak1	0.141809	-0.603229
Nudt4	-0.968106	-0.603157
Pot1a	-0.813005	-0.60245
Nphp1	-4.44908	-0.602381
Erc2	-2.53066	-0.602337
Rnf121	-1.29326	-0.602263
Cinp	0.571661	-0.601824
Tnfaip8	1.32679	-0.601742
Pop5	-0.522364	-0.60173
Pink1	-0.464542	-0.601492
Slc35a5	-1.05661	-0.601346
Twsg1	-0.74475	-0.601257
B230219D22Rik	-0.320289	-0.60109
BC048403	-1.37899	-0.600664
Fbxo21	-0.661202	-0.600437
Acer3	-0.555471	-0.599603
Myef2	1.21208	-0.599437
Ankra2	0.358549	-0.599338
Ywhab	0.317411	-0.599208
Adam10	-0.241767	-0.599037
Ednra	-2.04267	-0.598862
Sar1b	0.437305	-0.59871
Upb1	0.185159	-0.598631
Cks2	-0.412371	-0.598457
Heca	-0.4249	-0.598363
Fer	0.131498	-0.598283
Serbp1	0.849695	-0.597803
Tmbim1	-0.969571	-0.597708
Serpind1	-0.5062	-0.597439
Atpif1	-0.190772	-0.597403
Wtap	0.538126	-0.596958
Pex16	0.451148	-0.596946
Mrps23	-0.0927272	-0.596635
Rcan2	-2.18815	-0.59662
Sec11a	-0.408146	-0.596307
Agfg1	-0.940063	-0.596286
Trim30a	0.286458	-0.596202
Mfhas1	-0.55535	-0.596038
Tgm2	-0.273968	-0.596013
Srr	-0.94959	-0.595894
Scarb2	0.124407	-0.595798
Fgfr1op2	-0.702471	-0.595525
Slirp	0.879943	-0.595507
C730027H18Rik	-0.187273	-0.595309
Arfip1	-0.353064	-0.595112
Gsap	0.0571325	-0.595026
Cd1d1	-0.012641	-0.594842
Med13	-0.431693	-0.594599
Rpl31	0.684589	-0.594325
Polr2l	0.0175177	-0.593523
Osgep	-0.0201119	-0.593322
Rpl27a	-0.123198	-0.593253
Clic5	-0.198479	-0.593147
Ctsh	0.0176141	-0.592912
Bcap31	-0.406304	-0.592798
Zfp324	-2.15384	-0.592754
Tsr1	0.680212	-0.592562
Fuca1	-0.563491	-0.592043
Uqcrc1	0.460791	-0.59168
Cfhr1	-0.36452	-0.591558
Mkks	-0.0586409	-0.591385
Ppp4r3b	0.682708	-0.590976
Mblac2	-1.57318	-0.590726
Fpr2	-4.34332	-0.590346
Cdc25a	-0.189085	-0.590061
Trappc6b	1.14588	-0.589949
Mcph1	-0.750688	-0.589867
Cyp2d11	-0.46674	-0.58947
Saysd1	-0.12358	-0.589225
Gucy1a1	-0.318026	-0.589179
Them7	-0.142423	-0.589158
Pigx	-1.26341	-0.588805
Golph3	0.0437216	-0.588537
Tnfrsf11a	-5.36679	-0.587932
Mrpl48	0.195324	-0.587914
Shoc2	-0.0814002	-0.587494
Manbal	-0.055025	-0.587358
E330009J07Rik	-1.67972	-0.587279
Clic1	1.33186	-0.58715
Tmed3	0.0278163	-0.587024
Fam199x	-0.0402507	-0.586767
Csf1r	-0.487011	-0.586489
Afm	-0.427104	-0.586126
Top2a	1.00438	-0.586023
Gclm	-0.371146	-0.58594
Psmc6	0.836347	-0.585887
Dusp6	-0.0359235	-0.585743
Rassf8	-1.02004	-0.585612
Zfp597	-0.234079	-0.585402
Lgals3	-1.62765	-0.585028
Paics	0.827489	-0.584214
Polr2d	0.530636	-0.584191
Zfp40	-4.87686	-0.584191
C8b	0.462473	-0.583463
Hnrnpab	-0.199612	-0.583297
Tsen34	1.01341	-0.583149
Slco1b2	0.163475	-0.58305
Ifnar2	0.855118	-0.582955
Cnih4	-0.385213	-0.582711
Ccs	0.763452	-0.582693
Lyrm2	-1.05154	-0.582564
Senp5	-1.00557	-0.582144
Ulk2	-0.453769	-0.581902
Tagln2	0.523797	-0.581531
Entpd2	-0.915163	-0.58144
Cadm1	-1.18743	-0.581286
Gtf2i	-0.47772	-0.581211
Ppp2ca	0.0876348	-0.580785
Tspan14	-0.0629534	-0.580686
Cwc27	-5.57932	-0.58046
Naglu	-1.32452	-0.579687
Zfp280c	0.523764	-0.57952
Park7	-0.222052	-0.579276
Lrat	0.693817	-0.579013
Tab1	-5.80286	-0.578933
Psmc1	0.0329992	-0.578549
Tmem184a	-2.0438	-0.578023
Cct5	0.942184	-0.578015
Irf5	0.949259	-0.577914
Timm17b	-0.174836	-0.577805
Scfd1	0.494196	-0.577631
Fam122b	-5.16465	-0.577272
Rabep1	-0.846026	-0.577269
Aimp2	1.56695	-0.577153
Sptlc2	-1.10919	-0.576851
Gm15417	-5.3949	-0.576514
Cpped1	-0.512141	-0.576263
Ces1g	0.319256	-0.576004
Gltpd2	-1.09067	-0.575858
Kdelr1	-0.958843	-0.575816
Fbxl4	-0.418758	-0.575777
Rbpj	-0.420545	-0.57575
Adgrl2	-0.0748254	-0.575459
Bccip	1.00262	-0.575381
Rpp30	1.14415	-0.575193
Rad21	-0.679275	-0.57519
Snrnp27	0.314098	-0.575026
Cyp4f14	-0.834339	-0.57469
Cyp2e1	0.165864	-0.574667
Mkrn2	-1.02216	-0.574288
Mmut	0.626416	-0.574264
Met	-0.203574	-0.574209
Nudt19	0.407279	-0.573758
9130401M01Rik	-2.63898	-0.57332
Pigw	-5.47055	-0.573107
Bod1	-0.477808	-0.573047
Ablim1	-0.990054	-0.573034
Tasor	0.320008	-0.57297
Tmem254b	-0.85851	-0.572689
Slbp	0.374925	-0.572651
Hspd1	-0.35092	-0.572191
Ciita	-0.607294	-0.572131
Reep3	-0.744616	-0.572088
Mrpl3	1.08995	-0.571834
Pdia6	-0.14242	-0.571802
Tinf2	-0.52581	-0.571313
Rdh7	0.0493508	-0.571269
Ctnnd1	0.409159	-0.570795
Abcg1	-0.552665	-0.570781
Zfp110	0.0174176	-0.57071
Pip4p1	-0.286283	-0.570684
Hsf2	-0.303195	-0.570502
Rps19	0.613807	-0.570412
Mrm2	0.620165	-0.5704
Pdpk1	0.344255	-0.570349
Gorab	-2.14918	-0.570079
Rab5if	-0.142887	-0.569551
Sh3d19	-0.651269	-0.569191
Atp5g1	-0.635965	-0.568786
Hibadh	0.706091	-0.568484
D10Wsu102e	-0.0626627	-0.568428
Cyp20a1	-1.38322	-0.568389
Tsr2	0.119901	-0.568048
Rpl36a	0.288873	-0.568024
Noa1	0.470483	-0.567737
Arhgef16	-0.0875775	-0.56765
Dock10	-0.886952	-0.567618
Fgb	-0.553635	-0.567086
Gm10778	0.16312	-0.566535
Gstcd	-1.33841	-0.566451
Pofut1	-0.332136	-0.566212
[truncated: 6,923 more rows]

## Sheet: F(430)
gene_name	log2FC_Ribo-seq	log2FC_RNA-seq
Slc46a3	-0.452188	1.00774
Pofut2	-2.05968	1.01
Sh2b3	-1.07148	1.01279
Fbxo34	-0.711956	1.01331
Ubald1	-2.16665	1.01513
Tie1	-0.389254	1.01912
Nop14	0.832633	1.02068
Pus7	0.271208	1.02212
Peak1	-0.208337	1.02425
Sugp1	0.342632	1.0244
Mrtfb	-0.0202735	1.02873
Acy1	0.0751178	1.02949
1700017B05Rik	-0.249859	1.03058
Ccdc174	0.330702	1.03353
Vac14	0.417613	1.03404
Tacc2	-0.758069	1.03605
Cdhr5	-0.985484	1.03788
Necap2	-0.210107	1.04159
Prkce	0.023146	1.04201
Leng1	-0.686364	1.04946
Celf2	-1.18473	1.05065
Surf2	-0.11502	1.05282
Nolc1	0.403724	1.05303
Ddx41	-0.3744	1.05309
Hdac4	-1.18122	1.05462
Dxo	0.672515	1.05951
Ssh2	-0.275471	1.06882
Sgsm3	-0.28141	1.07041
Gpatch1	1.28356	1.07072
Dctn1	-0.206045	1.0719
Ctif	-0.311964	1.0746
Txnip	0.497191	1.07785
Ptp4a3	0.320422	1.0795
Col6a1	-0.060364	1.08511
Lmnb2	1.3529	1.0868
Rnf25	-0.98748	1.08906
Paf1	0.647127	1.08991
Mrtfa	-0.0313072	1.09355
Ubr2	0.493657	1.09442
Ttc7b	-0.0403461	1.09526
Parp6	-0.0362852	1.09676
Foxo1	0.036252	1.09852
Plbd2	-0.40958	1.09862
Cnot4	-0.828431	1.09922
Cdk18	0.423856	1.10027
Arl4d	1.30173	1.10177
Caskin2	-1.12446	1.10317
Junb	-0.499554	1.10655
Rara	-0.0662272	1.10673
Dedd2	0.326577	1.11044
Lonrf3	0.110533	1.1124
Lypla2	-0.37038	1.11317
Lrp3	-0.695306	1.11429
Dhx34	-1.09138	1.11624
Fam120b	-0.742138	1.11644
Zc3h3	-0.811029	1.12188
Gimap6	-1.10363	1.12607
Itpr2	-0.764211	1.12972
Gas2l3	-1.20627	1.13516
Vps72	-0.879306	1.13782
Slc9a3r2	0.0886422	1.13807
Ddx46	0.836823	1.13898
Ppp1r15a	0.328687	1.13907
Anks3	-0.0239799	1.14032
Aass	0.590179	1.14203
C2cd3	1.15088	1.14858
Flt4	0.873734	1.15057
Atn1	-1.18	1.15096
Tmem131	-0.717347	1.15298
Hook2	1.04881	1.15919
Hdgfl2	-0.685097	1.16048
Grina	-0.637362	1.16267
Ubac1	0.668695	1.16588
Ripor1	-0.779743	1.1675
Pet100	-1.03163	1.16827
Map3k21	-5.28072	1.16882
Zfp575	0.0558761	1.17462
G6pc3	0.33251	1.17504
Abhd6	0.427728	1.17646
Upf1	0.0986492	1.17657
Fmo2	1.11438	1.18013
Sf3a2	-2.26426	1.18206
Cactin	-0.709168	1.18422
Tnrc6c	-1.43084	1.18744
Dhx57	0.0762476	1.18799
Cyp27a1	-0.29248	1.19423
9430015G10Rik	-4.56248	1.19785
Dmac2	-0.589084	1.19849
Ftsj3	0.168415	1.19875
Sh3tc1	0.0661216	1.20001
Sytl1	-0.00278815	1.20023
Acd	-0.296929	1.20369
Ccdc22	0.802717	1.2048
Mlxip	-2.0954	1.20767
Kdm6b	-0.21353	1.21415
Klc4	0.524519	1.21525
Lzts2	-1.63443	1.21626
Zfp574	-0.200781	1.2174
Ppp1r12c	0.407959	1.21838
Tyms	1.47081	1.21851
Klf15	-0.675834	1.2186
Herc2	-0.579611	1.22323
Taok2	-0.380147	1.22675
Gm4737	0.487142	1.22811
Pnpla2	-0.636221	1.23417
Trim24	1.09572	1.23677
Neb	-1.80599	1.24356
Cep250	-0.54713	1.24453
Ptpn23	-0.214011	1.24539
Flt1	0.229224	1.24579
Tmtc2	0.502037	1.24678
Gps2	-1.93595	1.24789
Rasgrp2	-0.313958	1.24881
Mfsd11	-0.648619	1.24881
Tead1	-0.558138	1.24924
Camsap1	-1.23402	1.25054
Ap3d1	-0.61081	1.25076
Tut1	1.03926	1.2545
Adgrf5	0.351899	1.25484
Rhbdf1	-5.40122	1.25558
Ogfrl1	-0.266544	1.25824
Prkd2	-0.227167	1.25955
Slc22a5	0.988412	1.26004
Plekhg3	-0.404164	1.26039
Icam1	0.477575	1.26075
Slc26a10	-1.44071	1.26379
Mnt	-2.45461	1.26791
Plekhf1	0.036372	1.27
Lrp4	0.604384	1.27014
Proser2	-1.11366	1.27017
Tmcc1	-0.250753	1.27402
Mapt	-1.18529	1.2743
Pdcd11	0.124769	1.27704
Jak3	0.993753	1.27814
Ubn2	-0.75732	1.27849
Mdn1	0.691259	1.28098
Akap13	0.0772735	1.28136
Nav1	-0.335049	1.28714
Tcof1	-0.733989	1.29047
Nsrp1	-0.363224	1.29185
Arhgef15	-0.176905	1.29667
Nsd3	-0.637047	1.30064
Plce1	1.24588	1.30492
Ascc2	0.402008	1.30789
Tmub1	-0.363858	1.3115
Prodh	0.760965	1.31273
Actn4	-0.0974055	1.31463
Adamts10	0.261417	1.31541
Fastk	1.22781	1.31777
Dmwd	-0.73122	1.31889
Actr5	-0.754782	1.31916
Slc50a1	-1.64316	1.31943
Zfp113	-0.713629	1.32077
Crtc2	-0.405788	1.32127
Ccdc84	-5.1792	1.32199
Unc45a	0.39259	1.32357
Mbd6	-0.904352	1.32473
Atg2a	0.559077	1.32856
Deaf1	-1.51912	1.33221
Cd3eap	-0.986358	1.33229
Noc2l	-0.568244	1.33421
Larp4b	-0.484674	1.33541
Itpr1	0.0202601	1.33788
Kctd15	0.61423	1.34227
Ces1d	0.720695	1.34663
Dnmbp	-0.878485	1.3483
Alg12	-1.41071	1.35364
Pptc7	-0.0715395	1.35414
Csrnp1	-1.07344	1.35526
Kcnk5	-0.161898	1.35812
Adgrl1	-5.96021	1.35841
Trak1	-0.357297	1.35869
Elmod3	-0.530741	1.36152
Vps9d1	0.176196	1.36296
Zmiz2	-0.787378	1.36333
Trip10	1.47323	1.36406
Robo4	-0.0539472	1.3646
Zscan12	0.435755	1.37004
Prr12	-1.94124	1.37072
Rhobtb1	-0.503713	1.37598
Nfkb2	-0.201773	1.37888
Supt5	-0.188368	1.38001
Slc6a9	-0.819328	1.38049
Slc43a3	-0.747658	1.38209
Tmem101	-4.90865	1.38225
Ctla2a	-0.439882	1.38315
Rbbp8	-0.497709	1.38812
Abcb9	-0.294357	1.39051
Smyd2	-1.03369	1.39107
Acvr2b	-1.40671	1.3951
Sh3bgrl3	-5.73991	1.39743
Dclre1a	0.492986	1.39766
Rabl6	-1.53013	1.39774
Arhgap45	-0.19967	1.39885
Nlgn2	-4.46093	1.39888
Hba-a1	0.770269	1.39962
Slc20a1	0.0740817	1.40346
Scaf1	-0.772497	1.40491
Trp53bp2	-0.323906	1.40554
Clip1	0.363044	1.40645
Polr1a	1.03065	1.40832
Cntrl	0.874516	1.40889
Esrra	-0.441785	1.40925
Ncor2	-0.259063	1.41384
Pabpc4	-0.622529	1.41754
Snapc4	-1.94496	1.41756
Hba-a2	-0.539955	1.42071
Cry2	0.583985	1.42221
Map3k5	0.105541	1.42563
Slc43a1	-0.442548	1.42843
Mybbp1a	0.534265	1.43099
Kri1	-0.839676	1.43143
Brpf3	-0.360167	1.43268
Clk3	-0.18563	1.43332
Srsf4	-1.21213	1.43546
R3hdm1	-0.614012	1.43606
Sec14l4	0.473811	1.43814
Pole	2.64906	1.43902
Pcyt2	0.0645673	1.43984
Slc25a19	-0.030804	1.44466
Phldb1	-5.85693	1.4502
Ppan	-1.09273	1.45227
Col6a3	-0.511036	1.45378
Stk19	-0.390599	1.45636
Spata2l	1.08433	1.45713
Mmaa	0.223941	1.46177
Baiap2	-0.833275	1.46214
Kif3a	-0.719348	1.46249
Rarg	-0.138957	1.46544
Fyn	0.276168	1.46746
Ahdc1	-0.93339	1.47511
Hsf4	-1.03826	1.4756
Hnrnph3	-0.670296	1.48136
Ddx39b	0.437558	1.48151
Phkg2	-1.16183	1.48366
Gde1	0.0594747	1.48912
Frmd4b	-0.85962	1.49257
Ppp3ca	0.687631	1.49616
Rbm6	-0.373556	1.50237
Trmt5	-6.12482	1.50238
Zfp451	-0.148544	1.50417
Clasrp	-5.34457	1.5129
Zfp281	-0.359226	1.51298
Zmynd15	1.65742	1.52068
Cyp46a1	-0.482156	1.52517
Ddit3	-1.4317	1.52914
Scnn1a	0.178306	1.53512
Lrrc32	0.489033	1.53781
Rbm38	-0.77524	1.53899
Ushbp1	1.54053	1.54068
Pla2g6	0.500448	1.54153
Rbm4	0.312333	1.54842
Mast2	-1.36868	1.54955
Acer2	1.06148	1.54956
Pde4a	0.915017	1.55129
Zfp276	-1.05494	1.55332
Ddx55	1.00289	1.55425
Nt5c2	0.676578	1.55559
Stab1	0.0609188	1.55785
Esr1	-0.300337	1.56142
Agpat1	-2.74097	1.56822
Rapgef3	0.725587	1.57458
Phf11c	-1.24123	1.57589
Slc17a9	-5.61744	1.58315
Dhx16	-0.477999	1.58385
Atad2	0.0825631	1.58508
Carmil1	0.0528574	1.58659
Tulp3	-4.54986	1.58683
Apex2	-1.92799	1.5871
Hpd	0.903654	1.59191
Prpf3	0.761435	1.59351
Sipa1	-1.49043	1.59666
Ivns1abp	0.775025	1.59776
Klf13	-0.208349	1.59943
Lrrfip2	0.620308	1.5996
Plxna4	-0.507574	1.60092
Dlgap4	-2.16336	1.60119
Rapgef4	0.722563	1.60167
Fam102a	0.473685	1.6019
Mapk1ip1	0.241044	1.60251
Zfp142	-0.629713	1.60409
Arhgef1	0.546965	1.608
Gata6	0.435825	1.60841
Isyna1	0.732979	1.60885
Sema3f	0.21745	1.61029
Agap2	0.540459	1.61188
Ifi207	-0.267905	1.61199
Scarf1	-1.09034	1.61372
Lims2	0.77775	1.61411
Zbtb40	-1.23197	1.6144
Pdlim7	-0.0236678	1.62096
Lmbr1l	-0.392251	1.62259
Tmed5	0.421715	1.62444
Samd1	-0.556891	1.63158
Cbx6	-5.82441	1.63612
Rhbdd2	-0.237149	1.63967
Frrs1	-0.838909	1.64227
Mfsd2a	-0.0106749	1.64241
Mrpl38	0.445219	1.64663
Herpud1	0.95281	1.64891
Arhgef17	-5.78257	1.65122
Tnks1bp1	-0.349017	1.65372
Adcy4	-0.56055	1.65495
Lepr	-1.91433	1.65832
Lnpep	-0.698497	1.66084
Abcd4	0.233726	1.66125
Arap3	0.0684817	1.66431
Banp	1.33838	1.66933
Safb2	-1.09891	1.67281
Foxo3	0.491701	1.6736
Ggt5	-5.06381	1.67771
Fdxr	0.879457	1.67833
Notch3	-5.96567	1.68013
Sik1	0.475481	1.68113
Gpr4	-5.0792	1.68166
Grem2	1.05269	1.69732
Gm15455	-1.41082	1.70802
Rfx1	-2.05015	1.71794
Slc25a51	-0.643171	1.72023
Txndc11	0.223181	1.72039
Simc1	-0.847019	1.72331
1810055G02Rik	-0.83155	1.72707
Adam15	-0.865135	1.72792
Sh2d3c	1.57395	1.73195
Fam214a	0.155399	1.73311
Col27a1	-1.4233	1.73543
Xylb	-0.0973717	1.74621
Tmc7	0.592386	1.75341
Snrpa1	1.1349	1.75795
Zbtb48	1.82892	1.759
Sdsl	1.90805	1.76388
Ablim3	-1.33489	1.76593
Hist1h4h	-1.16382	1.77288
Pcgf2	-1.14012	1.78557
Tnxb	-0.443008	1.78711
Rorc	0.145357	1.79242
Chd7	-0.644188	1.79954
Adamtsl5	-4.86573	1.8006
Pear1	-1.31444	1.82101
Shank3	1.12726	1.82441
Gtf2ird2	-0.897065	1.82725
Kcnb1	2.2486	1.83481
Naa80	0.0345168	1.84762
Clca3a1	0.827909	1.84876
Gm9159	-0.2603	1.84996
Afmid	0.222012	1.85145
Plk3	0.0260947	1.85353
Hlx	0.305343	1.85934
Zfp750	-0.222888	1.86469
Marveld1	-0.619724	1.86982
Dop1b	-0.340213	1.87376
Notch4	-1.67968	1.88003
Prr3	-0.687511	1.90116
Rusc2	-1.21561	1.90495
Podn	0.525388	1.90958
Nr1i2	-0.132891	1.92339
Faap100	-2.57179	1.92389
Plekhg2	-6.1801	1.92817
Ngef	0.427912	1.93979
Zpr1	0.898956	1.94455
Zranb1	-0.314683	1.94512
Nos3	-4.92925	1.96292
Tro	-0.140886	1.99266
Ntm	-4.38106	2.00506
Chd1l	1.36226	2.00554
Speg	-4.67032	2.00742
Cebpb	0.780986	2.02076
Alpl	0.270675	2.02765
P4ha1	0.973996	2.02944
Mknk2	0.923361	2.03192
Tcim	1.21872	2.03581
Osmr	1.01407	2.08574
Lrrn3	-5.19289	2.0951
Gin1	0.706449	2.11119
Emsy	-0.686407	2.11192
Tsku	0.915168	2.12196
Inhbb	0.315111	2.14326
Sycp3	-0.934981	2.1482
Adamtsl4	-4.38104	2.14825
Eif5b	0.604662	2.15503
Rasip1	0.0627914	2.16008
Cebpd	-0.291149	2.17153
Adamtsl2	-1.1602	2.17968
Hecw2	1.07593	2.20374
Wdr92	0.948481	2.21269
Osbpl5	-0.876804	2.22001
H2-Bl	-2.79222	2.24078
Snhg3	-0.947299	2.24313
Gadd45g	0.909015	2.24317
Nr4a1	-0.987642	2.25434
Zbtb45	-5.17105	2.31127
C4a	-1.56674	2.33666
Slc8a1	-1.98822	2.34524
Cxcl1	-4.94148	2.35585
C330024D21Rik	-5.79959	2.38479
Il6ra	0.285048	2.38496
Fbf1	-1.81782	2.42491
Fbxo31	0.688426	2.46049
Map2k6	-0.68718	2.46461
Cfd	2.09971	2.47135
Zfp972	0.414013	2.47309
Plin4	-0.0463834	2.50959
Ces1b	-0.994208	2.51594
Per3	1.79932	2.62986
Foxn3	-1.3771	2.64824
Sorbs3	0.532472	2.69268
Tbc1d8	0.363638	2.73141
Olfr856-ps1	-1.51177	2.73871
Csrnp2	-0.964438	2.80145
Zbtb20	0.199159	2.83418
Ap1s3	-2.00156	2.85636
Mt2	1.52017	2.86352
Cnbd2	-0.515611	2.99093
Erdr1	0.436891	3.13701
4930519L02Rik	-1.60255	3.28785
Cyp2b10	1.12974	3.31892
Per1	0.92918	3.35104
Nrg4	2.10319	3.3989
Hist1h4c	1.16904	3.58624
Ces1a	-0.371037	3.7365
Zbtb16	1.10649	3.80882
Hist1h1e	-0.479676	4.03732
Il5ra	-2.29002	4.13555
Scarna6	0.689691	4.34887
Lars2	-0.782003	4.64267
Rn45s	-0.350763	5.54787
Snord17	1.11157	5.63438
Cd55b	-0.127724	5.99789
Snord118	0.750701	6.83751
Rnu12	-0.354803	7.51049

## Sheet: G(61)
gene_name	log2FC_Ribo-seq	log2FC_RNA-seq
Npas2	-6.51326	-8.94699
Acpp	-7.21041	-3.30277
Avpr1a	-2.03283	-3.06564
Slc41a2	-2.59168	-2.92564
Glt28d2	-6.52769	-2.65737
Aqp8	-1.82732	-2.64495
Atp2b2	-3.93603	-2.46207
Camk1d	-2.11718	-2.34017
Cldn1	-2.66371	-2.28124
Sdhaf4	-3.20954	-2.11619
Spp1	-1.66249	-2.07942
Rnf125	-1.80363	-2.07577
Insig2	-1.42403	-2.02512
Elovl3	-1.98892	-1.94758
Zc3h12d	-3.31536	-1.94592
Atf5	-2.02011	-1.94221
Gask1a	-3.26736	-1.88125
Pid1	-1.04455	-1.82545
Tubb2a	-1.85975	-1.81928
Lrfn3	-8.5155	-1.79086
Ctsc	-1.11121	-1.74504
C1qc	-1.70892	-1.73892
Cdk5rap1	-3.0852	-1.66388
Pla2g12b	-1.8194	-1.64101
Smagp	-2.30891	-1.63969
Cdh1	-1.92489	-1.62184
Sh3pxd2a	-1.89341	-1.60815
Mreg	-1.79599	-1.58484
Rtn4rl1	-7.11908	-1.55909
Slc16a1	-1.82147	-1.55799
Id2	-1.41081	-1.53284
Pde4b	-1.61173	-1.51693
Oaz1	-1.60786	-1.47695
Hdac11	-1.4373	-1.44631
Rell1	-2.95258	-1.44331
Slc30a10	-3.32109	-1.4289
Gas7	-2.33736	-1.40139
Arhgef10l	-2.15076	-1.39641
Ugt2b35	-1.23174	-1.3917
Cda	-2.55018	-1.3899
Dtx4	-4.19563	-1.32835
Cxadr	-1.26568	-1.29955
Lrrc8d	-1.66939	-1.29776
Ppp1r3c	-1.06503	-1.29689
Tsc22d1	-1.1435	-1.29016
Commd7	-3.7856	-1.27377
Lamtor1	-2.68798	-1.27222
Btg1	-1.08025	-1.23318
Slc17a4	-1.28753	-1.20392
Mad2l2	-3.72076	-1.1959
Irgm2	-1.64989	-1.19089
Srxn1	-1.64405	-1.18229
Tymp	-1.75469	-1.16177
Cpeb4	-1.48893	-1.16031
44448	-1.04664	-1.13912
Rbmx	-3.13423	-1.12784
Fam149a	-2.45261	-1.12082
Cdc14b	-1.26381	-1.104
Cox14	-3.69733	-1.06514
Nr2f2	-2.13009	-1.0505
Selenoi	-1.74168	-1.03208

## Sheet: H(724)
gene_name	log2FC_Ribo-seq	log2FC_RNA-seq
Neat1	-3.8498	0.349795
Zfp457	-6.34011	-3.95782
Cyp2b9	-7.82732	-2.51896
Serpinb9	-6.8899	-2.13203
Adra1a	-3.03696	-1.80863
Tstd1	-6.3383	-1.63068
B4gat1	-2.58235	-1.56447
Spred2	-7.12037	-1.45162
Tmem203	-2.32501	-1.30203
Pebp1	-1.022	-1.30026
Sowahb	-6.55605	-1.27769
Mrpl35	-1.57951	-1.27388
Cdcp1	-6.43884	-1.25442
Phospho1	-3.69248	-1.24809
Cox8a	-1.10948	-1.24508
Nat8f1	-1.22154	-1.24414
Lrrc3	-1.65067	-1.21143
Svip	-2.23364	-1.20457
Ostc	-1.44305	-1.19497
Tfcp2l1	-2.77026	-1.18523
Stom	-1.65366	-1.16567
Sdr9c7	-1.40118	-1.16455
Paqr9	-1.27793	-1.15539
Steap2	-7.34249	-1.14648
Gm11437	-3.75502	-1.14434
Slc22a1	-1.00886	-1.13121
Steap3	-3.59715	-1.12872
Tuba1b	-2.29574	-1.11977
Fzd7	-1.78652	-1.10352
Coq8a	-1.7304	-1.09489
Dpy30	-2.0466	-1.09239
Icmt	-1.94265	-1.0893
Jag1	-3.76886	-1.07593
Arntl	-7.67264	-1.06803
Smco4	-6.62287	-1.06471
Slc35f5	-1.24313	-1.05905
Hhex	-1.12448	-1.05682
Man2b2	-1.79225	-1.05652
Rab3d	-3.54899	-1.05444
Tmed7	-1.40351	-1.03496
Tnfaip2	-2.39842	-1.01863
Ptpn9	-2.69585	-1.0163
Nrn1	-1.05164	-1.01385
Rsad2	-3.33795	-1.01219
Pcbd2	-2.38642	-1.01145
Uprt	-1.99807	-1.00175
Lasp1	-1.43542	-0.999151
Selenot	-1.11782	-0.986146
Slc46a1	-2.04679	-0.983923
Mical2	-1.34915	-0.983896
Asb7	-2.23838	-0.981753
Gmcl1	-3.69201	-0.976994
Tnfaip8l1	-1.38314	-0.973467
Ptprf	-1.76382	-0.970022
Nav2	-2.83429	-0.963268
Ndufa6	-1.196	-0.957787
1700066M21Rik	-2.24847	-0.956696
Gna13	-1.37642	-0.956666
Pyurf	-2.39403	-0.956566
Mob3b	-1.94861	-0.951124
Etnk1	-1.02694	-0.948239
Timp2	-3.77887	-0.947831
0610030E20Rik	-1.85643	-0.937323
Sgms2	-1.55136	-0.933489
Mat2b	-1.62698	-0.928023
Trappc6a	-6.21188	-0.925333
Mtmr6	-1.75659	-0.921331
Serinc2	-2.89568	-0.917059
Pm20d1	-1.58711	-0.915446
Mal2	-1.25377	-0.914231
Hspa13	-1.63509	-0.903302
Pde9a	-2.15007	-0.88363
Tspan9	-1.35204	-0.882814
Mcat	-2.62981	-0.881075
Gstm6	-1.16274	-0.880993
Clta	-1.69711	-0.879375
Emc10	-1.81673	-0.874885
Hs2st1	-2.02318	-0.873666
St5	-1.41357	-0.871096
Stra6l	-2.06663	-0.870455
Nkiras2	-7.3812	-0.869614
Lgals3bp	-1.14198	-0.864545
Cyb5b	-1.26932	-0.86134
Plekha3	-2.17024	-0.852527
Srp54a	-6.17225	-0.852421
Ank	-1.46065	-0.852215
Zfp36l1	-1.74766	-0.849169
Mmd	-1.80141	-0.849105
Pnkd	-2.49589	-0.833415
Armcx3	-2.51372	-0.832838
Retsat	-1.35543	-0.832355
BC004004	-1.66628	-0.826711
Mmab	-2.34297	-0.820935
Blcap	-3.61761	-0.818529
Trim2	-1.4088	-0.815172
Bmpr1a	-2.18047	-0.81209
Hhip	-6.5695	-0.808731
Acnat2	-3.03778	-0.807801
Tgfa	-1.79219	-0.807137
Pglyrp2	-1.11676	-0.80615
Col15a1	-7.03301	-0.798717
Itgb5	-1.26257	-0.796683
Dr1	-2.04872	-0.795674
Gstt3	-1.45898	-0.767733
Slc35b2	-1.6592	-0.767455
Shank2	-3.34207	-0.765509
Mapk1ip1l	-1.15483	-0.763481
Tprgl	-1.6666	-0.762612
Dcaf7	-2.10258	-0.762219
Iba57	-3.07696	-0.753965
Slco2a1	-2.38559	-0.743071
Gclc	-1.04155	-0.740702
Yif1a	-1.21084	-0.740494
Fign	-2.59478	-0.740099
Fam210b	-1.20356	-0.736992
C130074G19Rik	-1.28353	-0.734722
Sumf1	-1.60256	-0.731828
Pou2f1	-2.28469	-0.731252
Srsf5	-1.28579	-0.730868
Pgp	-1.91564	-0.726408
Abcb11	-1.14068	-0.725835
Slc6a6	-2.41968	-0.714528
Irs1	-1.53644	-0.707533
Plxna2	-1.77845	-0.707421
Crip2	-1.21663	-0.703895
Clock	-1.73226	-0.701241
Emc6	-1.74695	-0.700282
Atxn7l3b	-1.45456	-0.696719
1110008P14Rik	-2.77567	-0.685848
Lrig1	-1.99083	-0.679874
Clpx	-1.60443	-0.670024
Fam160a1	-6.88142	-0.669658
Tmem170	-6.54427	-0.669181
Cggbp1	-1.10076	-0.657075
Hpx	-1.39115	-0.655615
Spcs3	-1.04408	-0.651928
Mfsd14b	-1.27031	-0.650638
Fam210a	-1.116	-0.646219
Rbfox2	-1.65166	-0.643279
Mn1	-3.53566	-0.639205
Thap6	-6.58123	-0.632263
Shroom2	-2.10683	-0.630899
Slc27a5	-1.04365	-0.619736
Slc35d2	-1.84065	-0.619377
Tmem147	-1.24018	-0.617976
Gng12	-1.38117	-0.616576
Cyp2u1	-1.52341	-0.607038
Hnrnpa0	-1.74627	-0.60614
Ext2	-2.72738	-0.598245
Slc39a1	-1.63671	-0.592761
Rassf3	-1.86688	-0.591696
Cyc1	-1.11419	-0.586163
Mb21d2	-1.73441	-0.585189
Gpr146	-1.53446	-0.584298
Pkhd1	-2.56944	-0.575294
Phldb2	-1.30909	-0.571617
Btbd1	-1.33699	-0.568731
Gldc	-1.53515	-0.56609
Aph1a	-1.36292	-0.565147
Repin1	-2.05283	-0.563386
Fgfr2	-1.73173	-0.561347
Ado	-2.53182	-0.555349
Gm20300	-1.31973	-0.554919
Rfx5	-3.45176	-0.551901
Vmp1	-1.42568	-0.550685
Zfp385a	-3.36656	-0.545524
C3	-1.14204	-0.542742
Nlrc5	-7.28085	-0.536836
Slc4a4	-1.2667	-0.536378
Gramd4	-6.27624	-0.534426
Mrpl58	-1.66207	-0.531948
Spsb3	-6.9202	-0.528107
Tbcel	-1.25008	-0.51805
Itih4	-1.01701	-0.515987
Vma21	-1.27591	-0.514585
Aga	-2.111	-0.514023
B3gnt2	-4.17699	-0.512966
Ninj1	-1.81984	-0.512069
Retreg2	-1.46004	-0.505375
Nectin1	-2.77199	-0.504179
Ndst1	-1.42856	-0.502737
Slc22a7	-1.54379	-0.498921
Thtpa	-1.93354	-0.497351
Capn10	-3.88183	-0.497075
Hsd3b7	-1.31128	-0.494177
Stt3b	-1.20486	-0.49368
Tmem30b	-2.21593	-0.487865
C77080	-2.55675	-0.487714
Tmem260	-2.67791	-0.487452
Apol7b	-7.00926	-0.487258
D130020L05Rik	-6.62949	-0.486779
Borcs6	-6.4426	-0.486069
Snapin	-2.03699	-0.485243
Rcor1	-1.55531	-0.483803
Sgpp1	-1.23584	-0.479188
Sys1	-2.12468	-0.478786
Rpsa	-1.21181	-0.476825
Ptdss1	-1.11318	-0.473921
Opa3	-2.17682	-0.469421
Crtc3	-2.07282	-0.463483
Mrap	-1.52317	-0.461125
Sod3	-2.4754	-0.459817
Adra2b	-6.9193	-0.457395
Med16	-3.15104	-0.45686
Cdkn2aipnl	-6.52043	-0.446433
Tmprss6	-1.10136	-0.446045
Slc26a1	-1.36598	-0.445201
9130023H24Rik	-6.60817	-0.441485
Sertad2	-2.45622	-0.438097
Slc27a4	-1.27987	-0.438048
Cyp1a2	-1.36051	-0.436762
Etl4	-1.90787	-0.435831
A230050P20Rik	-3.85238	-0.431637
Fam114a1	-1.88847	-0.426811
Myrf	-1.82863	-0.426513
Hs3st3b1	-1.17213	-0.425825
Acnat1	-2.05749	-0.425533
Dock8	-1.44324	-0.422877
Sft2d2	-1.27621	-0.422109
Tm9sf4	-1.06253	-0.419402
Ypel2	-1.59744	-0.417748
Gpx4	-1.13496	-0.417427
Pld1	-3.60419	-0.417071
Ptprg	-1.17264	-0.415632
Fem1a	-2.62396	-0.414877
Nme6	-2.8431	-0.41463
Map3k13	-1.83738	-0.410281
Mief1	-1.34855	-0.407831
H1f0	-1.76312	-0.407351
Slc16a10	-1.26046	-0.40595
Ston2	-1.68535	-0.405129
St3gal3	-1.66253	-0.401851
Pxdc1	-1.7114	-0.400009
Cop1	-1.7454	-0.397089
Gprc5c	-1.38748	-0.395079
Bok	-6.57969	-0.391125
Extl1	-3.84096	-0.383064
Slc22a30	-3.17902	-0.380151
Dsc2	-1.20114	-0.38007
Rundc3a	-6.27159	-0.378974
Tram1	-1.10296	-0.37775
Pqlc1	-1.19028	-0.377736
Ppdpf	-1.65989	-0.37756
Cldn3	-1.64576	-0.374442
Zdhhc5	-1.36431	-0.370761
Fbxo9	-1.35357	-0.36873
Helz2	-1.85819	-0.367899
Atxn1	-1.46317	-0.367065
Atxn1l	-1.65603	-0.366625
Lrrc14	-2.35809	-0.365153
Tcn2	-1.69267	-0.36351
Zdhhc18	-1.89584	-0.36313
Pdia4	-1.14614	-0.358598
Abca2	-2.44962	-0.358478
Xkr8	-6.83629	-0.356475
Fn1	-1.12427	-0.355864
6820431F20Rik	-2.51707	-0.353458
Mup15	-4.62862	-0.347322
Nr2f6	-1.60136	-0.346988
Itsn1	-1.57544	-0.346663
Mir22hg	-2.32415	-0.34605
Cfap36	-6.33195	-0.345051
Khk	-1.03848	-0.344482
Nr3c2	-2.29231	-0.343785
5033406O09Rik	-6.34392	-0.340924
Gm14296	-1.85955	-0.339405
Serpinf2	-1.26564	-0.339366
Pias2	-1.64164	-0.336008
Mettl4	-1.99427	-0.335787
Arap1	-1.26237	-0.333587
Minpp1	-1.41166	-0.330615
Trim21	-3.17614	-0.326326
Zbtb4	-2.34221	-0.322303
Ikbkg	-1.18706	-0.321761
Sec61a1	-1.27293	-0.320426
Slc22a23	-1.37936	-0.315017
Kpna1	-1.1285	-0.314406
2010003K11Rik	-2.87431	-0.312953
Szrd1	-1.80756	-0.311138
Ilvbl	-1.98399	-0.30499
Inhbc	-1.43762	-0.304176
Cyp2a12	-1.93007	-0.30356
Osgin1	-2.34663	-0.302362
Hfe	-1.23445	-0.297477
Agtr1a	-2.25964	-0.293205
Atp8b1	-1.13638	-0.292025
Ubald2	-1.78289	-0.290237
C730029A08Rik	-1.67733	-0.289313
Phip	-2.44576	-0.288553
Slc45a3	-2.45891	-0.282528
Gps1	-1.07062	-0.279311
Adnp2	-3.38717	-0.278301
Pef1	-2.36723	-0.277048
Rcn3	-6.33781	-0.27567
Ppp1r21	-1.86122	-0.272214
Ppt2	-1.55574	-0.270588
Agpat2	-1.14319	-0.270245
Khnyn	-1.79663	-0.268843
Atp11a	-4.37253	-0.264024
Tmem104	-3.62523	-0.259553
Cyp3a25	-1.34462	-0.254529
BC005561	-6.35304	-0.252439
Cyp8b1	-1.44081	-0.248475
Tigd2	-2.51947	-0.243961
Fzd8	-4.07556	-0.243624
Srf	-3.61086	-0.239502
Slc39a9	-1.25443	-0.238395
Ctdsp1	-1.09908	-0.235633
Pim1	-3.04985	-0.233228
Cxxc5	-2.26166	-0.232431
Ccdc85c	-1.7342	-0.218186
Gucd1	-1.4151	-0.215924
LTO1	-3.2944	-0.213914
Mycl	-3.32135	-0.212253
Cenpb	-1.95529	-0.210681
Mthfr	-2.21532	-0.207275
Hcfc1	-1.48636	-0.202747
Mcc	-1.30957	-0.202267
Mfap1a	-6.51301	-0.183631
Ifngr2	-2.77467	-0.181477
Hyou1	-1.24356	-0.179807
Zfp280b	-3.74855	-0.178223
Inip	-6.36211	-0.175363
Sco2	-1.73973	-0.175041
Mogs	-1.39055	-0.174855
Zc3h12c	-8.08592	-0.174475
Irf6	-1.70006	-0.173987
Srebf2	-1.07841	-0.173835
Lats1	-1.24794	-0.173238
Tmem125	-6.75494	-0.173237
Zfp180	-2.03538	-0.172481
Tpm1	-1.74932	-0.171357
2310039H08Rik	-1.77408	-0.167335
Dhcr7	-1.89193	-0.16481
Casd1	-1.47729	-0.16368
Ncbp3	-1.93469	-0.161612
Tmem250-ps	-1.63777	-0.150667
Ovca2	-7.55268	-0.149977
Dido1	-1.67836	-0.139819
Ythdc2	-1.72826	-0.137285
Ndst2	-2.18106	-0.132994
Syngr2	-1.96393	-0.132832
Zfyve26	-1.29477	-0.130336
Slc30a1	-1.4445	-0.126314
Kank1	-1.37891	-0.121047
Ern1	-1.12494	-0.120879
Il17ra	-3.31064	-0.116079
Slc52a2	-3.35778	-0.113272
Ddx54	-2.8804	-0.11184
Irf2bpl	-1.32659	-0.110781
Wdtc1	-1.05675	-0.109486
Slc17a2	-1.33996	-0.105436
AI661453	-4.64721	-0.103663
Zbtb22	-7.43972	-0.102711
H13	-1.49011	-0.100276
Hax1	-1.35005	-0.0935093
Mapkapk2	-1.27303	-0.0880002
Pcdh1	-1.35295	-0.0825116
Senp2	-1.56624	-0.0801601
Synj2bp	-1.15179	-0.0767795
Zzz3	-1.22612	-0.0762495
Mrps6	-6.45509	-0.0709418
Zfhx4	-2.25544	-0.0694392
Comt	-1.2621	-0.068902
Dsp	-1.35326	-0.0582118
Hgsnat	-1.18336	-0.0561388
Akap2	-2.3764	-0.0552295
Dcaf5	-1.89441	-0.0541001
Mfap3	-2.37156	-0.0539306
Kdm4a	-1.34164	-0.0509251
Kdm2a	-1.63291	-0.050852
Zkscan17	-2.20536	-0.0484127
Faf2	-1.40767	-0.0455705
Fignl2	-2.97288	-0.0446936
Mitf	-6.35404	-0.0434678
Palld	-1.07296	-0.0406513
Tmie	-2.41066	-0.040097
Gnai2	-1.09321	-0.0374128
Zfp644	-1.40555	-0.0342897
Sgpl1	-2.13928	-0.0322911
Rab22a	-1.79049	-0.0313336
Wwc1	-1.62761	-0.0296743
Dapk1	-1.63109	-0.0281601
Cmtm4	-1.07675	-0.0280671
Mboat7	-1.9917	-0.0276386
Pi4k2a	-2.10316	-0.022936
Cadps2	-1.68875	-0.0217586
Tjp3	-8.73532	-0.0175178
Romo1	-1.38271	-0.0165349
Gsn	-1.7425	-0.0160743
Traf6	-2.87401	-0.0113924
Chrna2	-6.51458	-0.00823265
Ttc13	-1.74543	-0.00736987
Tk2	-2.00285	-0.0071484
Slc35c2	-1.88851	-0.00241825
Marveld2	-3.2574	0.00622527
Mrpl19	-3.18316	0.00811314
Mxi1	-2.20423	0.00911283
Sh3bp5	-1.28366	0.0129445
Pip4k2b	-2.6271	0.0175093
Tulp4	-1.41315	0.0221013
Zer1	-2.27474	0.022584
Wsb2	-1.41469	0.0246482
Atraid	-1.17134	0.0299096
Ei24	-1.67922	0.0329791
Mlx	-1.7915	0.0345691
Tug1	-2.48476	0.0364454
Mapk3	-2.20392	0.0372957
Pi4kb	-1.8511	0.0375761
Tapt1	-1.10959	0.0397589
Grk6	-2.09861	0.0398692
Lemd3	-2.8628	0.0402159
Lrp5	-1.00425	0.044144
Kif1c	-1.5698	0.0613575
Nsmf	-1.41565	0.0616489
Cdk2ap2	-2.42033	0.0620485
Nrros	-6.60004	0.0685899
Gm19619	-6.2817	0.0694275
Tirap	-3.0881	0.0728284
Ago1	-1.3803	0.0730862
Lmo4	-3.04524	0.073649
Spns2	-2.17393	0.0749862
Hlf	-1.50271	0.0753493
Rnf217	-1.72423	0.0767018
Bach2	-3.38657	0.0801833
Wipf2	-2.85254	0.0824262
Bicral	-3.14129	0.0824997
Yipf2	-2.59191	0.0826212
Wrn	-2.99995	0.0827327
Zfp703	-6.50505	0.0834902
Rpl36	-1.35038	0.0877302
Pxmp4	-1.28844	0.0889694
Ryk	-1.77392	0.0913944
Ripk2	-6.09139	0.0923693
Tfr2	-1.18206	0.0958534
Bace1	-1.64392	0.0969687
Trir	-1.338	0.0970489
Arfgap2	-1.17452	0.0982301
Mgat4b	-1.40761	0.101311
4932438A13Rik	-1.54904	0.101437
Pigr	-1.0448	0.10174
F12	-1.02466	0.102843
Glmp	-1.63688	0.109792
Camk2g	-2.41499	0.113706
Cgn	-1.62303	0.120538
Axin1	-1.88117	0.121045
Trp53inp2	-1.16922	0.123018
Slc39a7	-1.85585	0.123789
Inpp5a	-2.11889	0.124285
Tial1	-2.2444	0.126867
Mgat1	-1.23831	0.12768
Dennd2d	-6.77866	0.129334
Uaca	-6.18073	0.130254
Rnf43	-2.31628	0.13156
Zdhhc7	-2.62131	0.132933
Gtf3a	-5.98785	0.136773
Mettl6	-6.97253	0.139485
Trio	-2.12327	0.141136
Col5a3	-3.68053	0.142095
Prmt6	-6.25968	0.148218
Usf3	-2.02	0.151807
Foxa2	-1.84763	0.157634
Mtmr3	-1.4744	0.160477
Slc25a23	-1.18799	0.16188
Nup160	-2.18416	0.16545
Etv3	-2.90803	0.166416
Tap1	-1.45557	0.169975
Scap	-1.7755	0.17122
Ssbp3	-2.12323	0.171504
Fkbp8	-1.16365	0.18534
Abcb10	-1.63289	0.18877
Polg	-1.46833	0.19017
Yap1	-1.24083	0.196174
Pigt	-2.36791	0.198546
Rreb1	-1.75265	0.201206
Gtpbp1	-1.7156	0.203383
Hjv	-2.29349	0.203458
Pigq	-1.18752	0.206342
Man1b1	-1.94459	0.220033
Lbp	-2.33539	0.220437
Tmco4	-3.3079	0.221439
Zdhhc8	-2.42436	0.221846
Lrrc8a	-1.56328	0.224008
Imp4	-2.75359	0.225597
Neu1	-1.76668	0.225735
Ccdc157	-2.44096	0.227507
Zfp771	-2.65574	0.228903
Cyp2d26	-1.02444	0.232083
Tlr5	-2.15941	0.232785
Scarb1	-1.53959	0.238486
4930523C07Rik	-6.66812	0.23882
Slc38a10	-1.45897	0.242062
Ints7	-2.70775	0.246219
Larp1	-1.19403	0.247455
Zbtb43	-2.04199	0.247912
Araf	-1.44931	0.250103
Tubgcp6	-2.5601	0.256356
Dmtf1	-2.87358	0.260051
Ccdc82	-2.47776	0.260357
Abcd1	-1.62604	0.275265
Dnajc22	-2.3278	0.279832
2900026A02Rik	-1.27213	0.280022
Irak2	-2.22722	0.283458
Nr1h3	-1.63851	0.284601
Sidt2	-1.23257	0.285592
Ppp5c	-1.50887	0.289882
Jade2	-3.22395	0.291335
Slc6a13	-1.88161	0.291655
Slc25a42	-1.79507	0.299645
Zmiz1	-1.6124	0.300093
Prox1	-1.23987	0.309365
Zfp235	-6.21705	0.309477
Hacd2	-1.42499	0.312035
Zfp36l2	-1.38539	0.315195
4930470H14Rik	-2.32813	0.324812
Ncoa1	-1.61666	0.329104
Maf1	-7.01221	0.32947
Pom121	-2.13343	0.33065
Zfp652	-2.64604	0.331566
Tcf20	-1.11717	0.333511
Cep104	-6.43003	0.33587
Arhgef19	-2.81859	0.336559
Dynlt1a	-3.24532	0.336744
Ifnar1	-1.21201	0.338847
Zfp467	-2.60462	0.339106
Cep57	-6.06311	0.339674
Crebbp	-1.24501	0.341198
Ampd2	-1.56681	0.361712
Hjurp	-2.32268	0.363555
Tpcn1	-1.03835	0.364253
Sall1	-4.37973	0.366505
Bin1	-6.47142	0.366756
Dnmt3a	-2.12363	0.369614
Asxl1	-2.27742	0.370278
Zfhx2	-3.69065	0.373647
Sptbn1	-1.30905	0.37689
Grk4	-2.45947	0.378173
Sema4a	-3.03894	0.379303
G530011O06Rik	-7.30792	0.38373
Eefsec	-1.85473	0.388768
Man2b1	-1.03061	0.395415
Llgl1	-6.63357	0.395866
Alg8	-6.56321	0.396854
Ip6k1	-1.40649	0.400726
Dyrk2	-2.97597	0.401737
Dusp1	-1.80993	0.404492
Luc7l2	-1.33722	0.406569
Irs2	-2.91933	0.408452
Col5a1	-6.55127	0.409778
Gm7102	-2.26231	0.410073
Fam20a	-2.1033	0.410487
Malat1	-2.16275	0.412974
Mllt6	-1.63078	0.418063
Cdk13	-1.33241	0.419148
Smarce1	-1.75745	0.420534
Carm1	-2.44476	0.42256
Itga3	-3.11707	0.423772
Abcb6	-1.29541	0.427698
Arhgef11	-1.19672	0.428806
Bckdk	-2.237	0.429976
Nipal1	-6.72594	0.433374
Top3a	-3.18842	0.4352
4930511M06Rik	-6.89818	0.43943
Onecut2	-1.53899	0.444936
Zfp937	-1.50098	0.44639
4930435F18Rik	-3.69638	0.447887
A130077B15Rik	-1.87882	0.451755
Pus1	-6.56423	0.458565
Rnf167	-1.59303	0.460064
Eps8l2	-1.80905	0.461493
Kmt2d	-1.25341	0.462932
Ess2	-6.19482	0.464382
Glt8d1	-6.00373	0.466569
Ercc4	-6.36206	0.468988
Srcap	-1.00051	0.479581
Proz	-1.05411	0.482939
Akap1	-1.42843	0.485193
Htt	-1.17325	0.488705
Fgfr4	-2.48609	0.488974
Gcgr	-1.21917	0.492916
Map7d1	-1.90448	0.493229
Bcr	-1.03198	0.496885
Mbtps1	-1.91524	0.497322
Ncoa6	-1.69807	0.498601
Ppp1r9a	-6.49693	0.502349
Arid1a	-1.48275	0.502584
Pmm2	-1.71504	0.503259
Reep4	-6.65582	0.505824
Phf7	-5.97227	0.507008
Gatad2a	-1.4031	0.510368
Ptpn21	-2.50042	0.512192
Ints3	-2.29401	0.514862
Rsrc2	-2.89303	0.515092
Os9	-1.11506	0.519102
Dvl3	-2.00562	0.521515
Fam222b	-2.42972	0.526599
S100a11	-6.21601	0.530562
Atpsckmt	-6.74104	0.537248
1810032O08Rik	-2.66222	0.540739
Arrb1	-2.28225	0.542982
Nedd4l	-1.0765	0.544452
Nfx1	-1.31404	0.544888
Cul9	-6.17081	0.546981
Plekha7	-6.02999	0.547407
Ugt1a10	-6.35054	0.55208
Slc38a7	-1.62258	0.553851
Nckipsd	-5.97135	0.55444
Ccdc15	-2.13452	0.555515
Fbxl20	-1.89913	0.556562
Cyp2d13	-1.61898	0.569271
Alg10b	-1.40307	0.579059
Kmt2c	-1.41722	0.586746
Zfp35	-6.91053	0.600116
Aak1	-1.77452	0.601406
Ptk2	-1.58669	0.604279
Tbc1d2b	-1.57141	0.608093
Homer1	-2.67477	0.611158
Rrbp1	-1.05517	0.614197
Usp21	-2.47587	0.616862
Samd4b	-1.97672	0.616869
Preb	-1.6756	0.620342
Camk2b	-6.61946	0.622482
Szt2	-1.82764	0.626889
Pbx2	-2.53367	0.630927
Celsr1	-1.27224	0.63159
Eng	-1.39559	0.636509
Rad54l2	-1.11576	0.639
Washc1	-2.1676	0.643096
Tnrc6a	-1.70333	0.643348
Sipa1l1	-1.6509	0.648733
Sphk2	-1.47444	0.650546
Eppk1	-1.09853	0.651456
Marcksl1-ps4	-6.04171	0.667139
Cyp4f13	-1.37192	0.673399
Tmem201	-7.54551	0.676683
Pald1	-3.32303	0.678621
Herc1	-1.35276	0.68791
Xpo6	-1.26664	0.695928
4833420G17Rik	-2.44406	0.697178
Clcn5	-6.39632	0.707605
Myoparr	-6.18317	0.70915
Dpagt1	-2.43477	0.71033
Nr1h2	-2.38688	0.717289
Uhrf1bp1l	-1.19182	0.726808
Gm10069	-5.91345	0.727156
Sptbn2	-1.72178	0.727456
Smpd4	-7.47251	0.731754
Plscr3	-6.66125	0.731765
Dpp9	-1.55438	0.741107
Plekha6	-1.73752	0.742936
Tpp1	-1.21807	0.7452
Arid2	-1.88879	0.747607
Mms19	-2.11833	0.75277
Cyp4x1	-1.59498	0.756783
Tubgcp3	-6.14654	0.757312
Sppl2b	-2.20141	0.769417
Irf2bp2	-1.14357	0.782394
Csk	-1.4009	0.786077
Mlxipl	-1.1952	0.788564
Btbd2	-4.10725	0.78941
Mical3	-2.06534	0.795591
Zfp523	-2.53111	0.796256
Ube3b	-1.36326	0.800916
Lpcat3	-1.20111	0.802026
Baz2b	-3.11599	0.810085
Gm14762	-2.46137	0.822993
Fbrsl1	-2.81678	0.830634
Atg9a	-2.09688	0.835671
Sema6a	-3.18837	0.839285
Plec	-1.50722	0.847471
Phf12	-2.09217	0.851844
Rcc2	-2.06836	0.8642
Wiz	-3.82211	0.873138
Zfp395	-1.5761	0.880168
Emilin1	-1.92727	0.892775
Prrc2a	-1.84101	0.89663
Fam214b	-7.1946	0.898349
Synpo	-3.02724	0.901622
Cic	-1.50307	0.903472
A630089N07Rik	-2.16686	0.905695
B4galnt1	-1.5994	0.908823
Slc8b1	-2.57727	0.912017
Mrgpra6	-1.84268	0.912475
Syne1	-1.25215	0.913393
Tmem259	-1.45811	0.923164
Fgd6	-1.00863	0.923353
Wasf2	-1.46867	0.926104
Abl1	-1.7134	0.933186
Sbf1	-1.37572	0.94
Fbxl6	-6.2085	0.940247
Mpnd	-1.73834	0.947944
Chkb	-1.74886	0.952373
Pcnx3	-1.51094	0.955574
Zfp488	-1.7738	0.961899
Bcl9l	-1.62395	0.962438
Stk11	-1.59426	0.997748
Rtkn	-6.0922	1.01701
Tmem25	-2.07912	1.01756
Hectd4	-1.53699	1.03282
Capn15	-2.91211	1.03562
Kmt2b	-2.64724	1.04867
Tmppe	-2.98792	1.06022
Fnbp4	-6.83033	1.07609
Slc12a7	-1.86859	1.07829
Pitpnm2	-1.98721	1.08909
Tcirg1	-1.73879	1.09196
Med12	-2.19219	1.09259
Tox	-6.18164	1.11262
Npr2	-1.20756	1.11426
Pi15	-6.47894	1.12969
4930431F12Rik	-6.68266	1.1708
Cyp2d37-ps	-6.60872	1.20031
Tmem132e	-6.0138	1.23082
Tmem150a	-2.08585	1.27359
Map11	-6.41548	1.28113
Urml	-3.02925	1.30515
Tmem131l	-2.26382	1.30927
Sfswap	-6.80147	1.31163
Hist1h4a	-3.26468	1.59842
Gys1	-6.41695	1.60595
Gm30963	-6.09645	1.6218
Rnf225	-2.25922	1.92863
Gm6614	-7.40133	1.98644
Gm12596	-3.44737	5.00439

## Sheet: I(30)
gene_name	log2FC_Ribo-seq	log2FC_RNA-seq
Zfhx3	-1.53698	1.03044
Ppp2r5b	-6.13134	1.04382
Setd1b	-1.44939	1.06309
Plcl2	-2.40305	1.11309
Ppp1r16a	-1.88468	1.11878
Snrpa	-2.04218	1.13186
Hmg20b	-2.18172	1.17122
Zfp777	-6.42095	1.20815
Fgfr1	-6.22028	1.24016
Tns2	-1.67139	1.24133
Foxp4	-2.4344	1.30565
Cnst	-6.04655	1.32399
Slc12a4	-2.15176	1.33906
Ppargc1b	-2.43901	1.37565
Kcnq1ot1	-2.39375	1.45084
Bfar	-1.42267	1.45543
Mast3	-1.72877	1.49824
Slc19a1	-6.46501	1.53417
Sema4b	-3.26101	1.55113
Syvn1	-2.4214	1.68067
Hipk2	-1.82032	1.82378
Slc29a1	-1.36661	1.86691
Myh11	-2.22857	2.14499
Rn4.5s	-7.09002	2.50033
4930512M02Rik	-6.37855	2.57213
Grk1	-3.65472	2.80067
Bud13	-6.16477	2.95515
Snord15b	-2.66164	4.06294
Ttn	-9.53177	4.7081
Hist1h3f	-1.68032	6.51562
